# Supplementary material for: Analysis of Content, Social Networks, and Sentiment of Front-of-Pack Nutrition Labeling in the European Union on Twitter
Source: Front Nutr. 2022 Apr 25;9:846730. doi: 10.3389/fnut.2022.846730 (PMC9083270; doi:10.3389/fnut.2022.846730)
Supplement: Supplementary file 1 [file Table_1.XLSX]

## Sheet: CONVERT ALL DATA
Source.Name	data__created_at	includes__users__name	includes__users__description	includes__users__location	includes__tweets__lang	data__lang	includes__tweets__author_id	includes__tweets__text	includes__tweets__referenced_tweets__type	data__author_id	data__text	data__referenced_tweets__type	includes__places__country_code	includes__places__country	includes__places__geo__type	includes__places__geo__bbox__001	includes__places__geo__bbox__002	includes__places__geo__bbox__003	includes__places__geo__bbox__004	includes__places__place_type	includes__places__id	includes__places__name	includes__places__full_name	data__entities__urls__start	data__entities__urls__end	data__entities__urls__url	data__entities__urls__expanded_url	data__entities__urls__display_url	data__entities__annotations__start	data__entities__annotations__end	data__entities__annotations__probability	data__entities__annotations__type	data__entities__annotations__normalized_text	data__context_annotations__|	data__context_annotations__|__id	data__context_annotations__|__name	data__context_annotations__|__description	data__entities__mentions__start	data__entities__mentions__end	data__entities__mentions__username	data__entities__mentions__id	data__entities__hashtags__start	data__entities__hashtags__end	data__entities__hashtags__tag	data__in_reply_to_user_id	data__geo__coordinates__type	data__geo__coordinates__coordinates__001	data__geo__coordinates__coordinates__002	data__source
jsonAT1.csv	2021-05-22 09:05:41	Chris 🇦🇹 🇪🇺 fighting corruption #RejoinEU	Fighting my dragons, brick by brick, on the road back to #EU.	A 6363 Westendorf, Österreich	en	en	20679021	@paullewismoney People don't have to buy it. You can shop at local butcher who will tell you provenance.	replied_to	715760036	@domandkittysmum @paullewismoney The laws of supply and demand will dictate trends. Recent 30% increase in food-banks hints millions of us will be looking to stretch a pittance still further. No more #EU labelling no safeguards.#RejoinEU @TheNewEuropean 🇦🇹🇪🇺	replied_to	AT	Österreich	Feature					city	d6efdf891b9c2e9b	Westendorf	Westendorf, Österreich															0	16	domandkittysmum	20679021	200	203	EU	20679021				Twitter for iPhone
jsonAT1.csv
jsonAT1.csv		Paul Lewis	Financial journalist broadcaster speaker. Seek truth find truth tell truth. Unequivocally for free speech & press. Wilkie Collins expert. Like = file not agree	UK. Usually in London.																																		238	253	TheNewEuropean	7.48864e+17
jsonAT1.csv		The New European - Think Without Borders	Award-winning political & cultural journalism. \nFearless, honest, independent. Not easily intimidated.\nSupport us by subscribing: https://t.co/frRW8LpeZF	United Kingdom
jsonAT1.csv		Chris Grant	Reformed accountant now working in transnational education. Research interests TNE, research ethics, research methods. All views are my own	Adlington, Cheshire																																		17	32	paullewismoney	221338206	228	237	RejoinEU
jsonAT2.csv	2019-02-26 18:46:55	Mike	Nerd, SRE, OE1OMK, opinionated ex-Googler. As Aristotle once said - Η ζωή είναι ένα αγγούρι, η γυναίκα είναι το ποδήλατο.	Wien, Österreich	en	en	25099282	@BootstrapCook Listen to @rustyrockets and @SimonAmstell talking about vegan cheese being available in Tesco. I love them both but a smack of Marie Antoinette off them! #letthemeatvegancheese	replied_to	757055	@pamelora @BootstrapCook @rustyrockets @SimonAmstell Vegan cheese, aka “the stuff you’re not allowed to call cheese in many jurisdictions with sensible food labelling laws”.	replied_to	AT	Österreich	Feature					city	9f659d51e5c5deae	Wien	Wien, Österreich											domain	10	Person	Named people in the world like Nelson Mandela	0	9	pamelora	25099282				25099282				Twitter for iPhone
jsonAT2.csv																																		domain	65	Interests and Hobbies Vertical	Top level interests and hobbies groupings, like Food or Travel
jsonAT2.csv																																		domain	30	Entities [Entity Service]	Entity Service top level domain, every item that is in Entity Service should be in this domain
jsonAT2.csv																																		entity	8.24777e+17	Generic Food	Generic Food
jsonAT2.csv																																		domain	30	Entities [Entity Service]	Entity Service top level domain, every item that is in Entity Service should be in this domain
jsonAT2.csv																																		entity	8.25063e+17	Cheese	Cheese
jsonAT2.csv
jsonAT2.csv
jsonAT2.csv
jsonAT2.csv
jsonAT2.csv
jsonAT2.csv
jsonAT2.csv
jsonAT2.csv
jsonAT2.csv
jsonAT2.csv
jsonAT2.csv		jack monroe	largely unprofessional word wrangler	📧Rscoular@unitedagents.co.uk																														domain	56	Actor	An actor or actress in the world, like Kate Winslet or Leonardo DiCaprio	25	38	rustyrockets	19562228
jsonAT2.csv		Pamela O'Leary	Guidance Counsellor and TYCo with Cork Educate Together Secondary. Philosophy explorer, Ethics Bowl, RP Trainer. Tea ☕☕☕drinker, Mainly mummy.	Cork																														entity	8.08675e+17	Russell Brand	Russell Brand	10	24	BootstrapCook	512554477
jsonAT2.csv		Russell Brand	Sign up here to receive vital messages directly from me and to get your place on the ark if we can’t sort this sh*t out. https://t.co/EI4XN6PtT1																															entity	8.08675e+17	Russell Brand	Russell Brand	39	52	SimonAmstell	469399075
jsonAT2.csv		Simon Amstell	stand up comedian, writer, director etc.	london																														entity	8.25048e+17	Food	Food
jsonAT3.csv	2018-04-02 17:51:41	Chris 🇦🇹 🇪🇺 fighting corruption #RejoinEU	Fighting my dragons, brick by brick, on the road back to #EU.	A 6363 Westendorf, Österreich	en	en	8.99762e+17	Australia to demand Britain accepts hormone-treated beef as the price of a Brexit trade deal.\n\nPlease RT if you don’t want your family eating hormone-treated Brexit beef and chlorinated chicken.\n\nWe’re better off if we #StopBrexit and #Remain in the EU. https://t.co/I2Dpwh7leB		715760036	Post #Brexit the govt would relax food source labelling to “support” public. There would be zero chance to identify hormone produce and select safe alternatives from smkt shelf. The plus side : next generation could be taller than #EU cousins : all above 2m. EU safeguards 🇪🇺 https://t.co/ryrKj5k9jc	quoted	AT	Österreich	Feature					city	d6efdf891b9c2e9b	Westendorf	Westendorf, Österreich	277	300	https://t.co/ryrKj5k9jc	https://twitter.com/remain_central/status/980746393957683200	twitter.com/remain_central…						domain	65	Interests and Hobbies Vertical	Top level interests and hobbies groupings, like Food or Travel					5	12	Brexit					Twitter for iPhone
jsonAT3.csv																																		domain	30	Entities [Entity Service]	Entity Service top level domain, every item that is in Entity Service should be in this domain
jsonAT3.csv																																		entity	8.24777e+17	Generic Food	Generic Food
jsonAT3.csv																																		domain	30	Entities [Entity Service]	Entity Service top level domain, every item that is in Entity Service should be in this domain
jsonAT3.csv																																		entity	8.25049e+17	Chicken recipes	Chicken
jsonAT3.csv		Remain Central #FBPE #IAmEuropean #Rejoin	Campaigning to #Rejoin the European Union. News and views for pro-Europeans. #IAmEuropean. #FBPE. 🇪🇺	UK in the EU																														entity	8.25048e+17	Food	Food					232	235	EU
jsonAT4.csv	2016-03-19 18:38:05	Stefan Zehetner	Cash Crop Farmer Owner of Huron Cover Crops - The more that you read, the more things you will know. The more that you learn, the more places you'll go!	Hensall, Ontario	en	en	141431404	@TheYoungFarmer7 @Pasztor79 @LMcLachlan60 Yes. Lots of poor quality food coming off poorly-managed conventional farms under those conditions	replied_to	1546220544	@songberryfarm @Pasztor79 @LMcLachlan60 exactly, so labelling nutrition and quality of food is more important than a "organic" label	replied_to	AT	Österreich	Feature					city	0036224b2a183fcf	Linz	Linz, Österreich															0	14	songberryfarm	141431404				141431404				Twitter for iPhone
jsonAT4.csv					en		141431404	@Pasztor79 @LMcLachlan60 IMO the underwhelming reaction to a mandatory label would help put things into perspective.	replied_to																													26	39	LMcLachlan60	3050656497
jsonAT4.csv	2016-03-19 18:21:06					en				1546220544	@songberryfarm @Pasztor79 @LMcLachlan60 how about nutrition labelling, lots of worn out, overworked organic land producing poor quality food	replied_to																										0	14	songberryfarm	141431404				141431404				Twitter for iPhone
jsonAT4.csv		Lawrence McLachlan	Cash Crop Farmer Maple Producer Eternal Optimist. One day at a time 🇨🇦🇨🇦🇨🇦🇨🇦🇨🇦	Nairn Ontario																																		26	39	LMcLachlan60	3050656497
jsonAT4.csv		Mike Pasztor 🌽🌱🌾🐂🐷🥒🌶	Corn, soybeans, vegetables, ginseng and dabble in some livestock. GFO Delegate, NSCIA Director Pioneer Seed Sales Tweets and opinions are my own.	Norfolk County, Ontario Canada																																		15	25	Pasztor79	324149813
jsonAT4.csv		Rob Taller-in-Real-Life Wallbridge	Pro-diversity (in #ag & all else). 2 kids, 1 wife. CCA-ON 4R NMS. #soilhealth #organic farms. Outdoorsy. (Sometimes sarcastic) views = mine, mine alone! He/him.	Aylmer, Quebec																																		15	25	Pasztor79	324149813
jsonBE1.csv					en		1.3287e+18	We are really glad to take part in this stimulating event, hosted by @FarmEurope, about #Nutriscore.\n\nA great opportunity to reiterate our firm opposition to this absurd #FOPNL, that rewards artificial products and penalizes the natural and traditional ones.\n\n#NoNutriscore #EU https://t.co/Xr0FY85fQy					BE	België	Feature	3.13411	51.1582	3.31021	51.3633	city	8f4af0a2f7f81f49	Brugge	Brugge, België											entity	8.47869e+17	Home & family	Hobbies and interests					158	172	alimentazione
jsonBE1.csv		Rosanna Conte	Deputata del Parlamento Europeo con la Lega per la circoscrizione Nord-Orientale (Friuli Venezia Giulia, Veneto, Trentino Alto Adige, Emilia Romagna)	Caorle, Veneto	es		1.40728e+18	ta wenisimo este jugo https://t.co/f0TlkHYOIt																										domain	65	Interests and Hobbies Vertical	Top level interests and hobbies groupings, like Food or Travel
jsonBE1.csv	2021-11-01 10:49:05	Farm Europe	Farm Europe is a multicultural think tank that aims to stimulate thinking on rural economies. #thinktank #agriculture #food #environment #debate	Bruxelles, Belgique	nl	it	1088943962	Sciensano: “Nutri-Score op schappen in winkels niet genoeg om consument systematisch voor gezondere voedingsproducten te doen kiezen” https://t.co/yAo3dTm7uz		1.30362e+18	#FarmtoFork, @Rosannaconte_: sì alla difesa del Made in Italy 🇮🇹 , no agli insetti a tavola e al Nutriscore 🚫 https://t.co/2MN0aP1Wvj		BE	België	Feature	4.47996	51.1296	4.56518	51.1905	city	3435ebf86aed6c03	Boechout	Boechout, België	110	133	https://t.co/2MN0aP1Wvj	https://twitter.com/Lega_gruppoID/status/1455109631437647872/video/1	pic.twitter.com/2MN0aP1Wvj										13	27	Rosannaconte_	1.1282e+18	0	11	FarmtoFork					Twitter for iPhone
jsonBE1.csv	2021-10-30 00:54:27				fr	fr	1.00332e+18	Le nutriscore est un outil utilisé par les industriels pour vendre leurs produits.\nA chacun d’être responsable ,de s’informer réellement sur son alimentation. Ce n’est pas compliqué…Privilégions les produits frais et cuisinons. Et le fromage , c’est bon ! #equilibrealimentaire https://t.co/ddi5G66Aya	quoted	627676459	@Langlai73410097 Bel exemple. Le nutriscore de Coca cola est B, le jus de fruit frais D. Cherchons l erreur....	replied_to	BE	België	Feature	5.24264	50.8538	5.35197	50.9102	city	a6702fb13ddad7ae	Alken	Alken, België											domain	45	Brand Vertical	Top level entities that describe a Brands industry	0	16	Langlai73410097	1.00332e+18				1.00332e+18				Twitter for Android
jsonBE1.csv		No-Nutriscore Alliance	The Nutriscore is a truly unfair and discriminatory food labelling system, which misleads consumers, destroying entire European production chains. #NoNutriscore	Brussels, Belgium	es		243233973	El @Senadoesp pide un etiquetado nutricional que realce la dieta mediterránea. Aprueba una versión suavizada de una moción que promovía el PP contra #Nutriscore Lo cuento. Vía @EFEnoticias y @Efeagro https://t.co/MygH3fy3M0																										domain	47	Brand	Brands and Companies
jsonBE1.csv	2021-11-18 22:07:13	Kevin Pierloot	♻️ 🚯\n#destrandhelden\n#properstrandlopers\n#mooimakers	De kust	nl	nl	140966826	Dat @colruyt een prijs ging krijgen van @comeos_nl voor hun ecoscore dit jaar. Er zijn zekerheden in het leven. \n\nDat er geen enkele evaluatie over impact voorlopig is. Dat was ook zeker.\n\nMaar kijk in de folder klonk het goed.\n\nhttps://t.co/vahfBbcWn1		140966826	Mooi dat men de nutriscore onder een vergrootglas durft te plaatsen. Laten we dat ook eens doen bij die prijswinnende Ecoscore nu.	replied_to	BE	België	Feature	2.84026	51.1846	3.00374	51.2435	city	9e1ba235915b10a6	Oostende	Oostende, België																						140966826				Twitter for Android
jsonBE1.csv					pl		1.11516e+18	Czytanie etykiet żywności to jeden z najlepszych sposobów monitorowania spożycia cukru. https://t.co/oG7HVQFlUF	quoted																									entity	8.50144e+17	Soda	Soda
jsonBE1.csv		Lega Parlamento Europeo (gruppo ID)	Delegazione della Lega al Parlamento Europeo, gruppo Identità e Democrazia.	Brussels, Belgium	en		1.14926e+18	As shadow rapporteur, I voted against❌the AGRI Implementation report on on-farm animal welfare.\n\nHaving passed (36/5/7), we now have an unrealistic report that considers non-compliances in 🇪🇺 to be 'anecdotal cases' &amp; fails to see the need to reduce livestock production (...)																										entity	8.25048e+17	Food	Food
jsonBE1.csv		Bernard Vandenberg	Un orage emporté par les vents de l histoire. \nJe n en suis plus si sur. \nRobert Badinter	Belgique	fr		324397601	@montebourg @glacelamemere @UEFrance Ce même groupe qui, sans aucun doute quand la CE préparait en 01.2018 une proposition législative sur l’indication d’origine des aliments « a réagi vivement à cette décision &amp; a appelé la CE à annuler la mesure, estimant que celle-ci nuirait au marché unique européen » @EURACTIV https://t.co/xcdkBgShU4	replied_to																									entity	8.34828e+17	Drinks	Drinks
jsonBE1.csv	2021-04-26 10:36:01					en				1.07503e+18	🇭🇷 Minister @marvuckovic and \nother EU #Agriculture Ministers are meeting today via VTC to discuss: \n\n📌 Post 2020 #CAP reform package \n📌 Market situation \n📌 Agri Trade \n📌 EU strategy on animal welfare \n📌 Food labelling \n\n#AGRIFISH https://t.co/g1mZZJdVdH													231	254	https://t.co/g1mZZJdVdH	https://twitter.com/CroatiaInEU/status/1386599938637844481/photo/1	pic.twitter.com/g1mZZJdVdH										12	24	marvuckovic	1.20684e+18	39	51	Agriculture					Twitter for iPhone
jsonBE1.csv	2021-07-28 22:21:13	Mercedes Salas	Periodista de agencia #Madrid. Fui corresponsal en #Bruselas. \nExdirectora Comunicación del @mapagob\nCuenta personal. \nRT are not endorsements			nl				569363111	Vandaag kreeg ik bezoek vaneen groep enthousiaste Belgische jongeren die Europa vragen om een EcoScore (vergelijkbaar met de Nutriscore) in te voeren. Een label waarmee ecologische impact wordt aangetoond. Steun jij ook hun initiatief? Teken dan via https://t.co/FC6vCDbzxR https://t.co/xnYYqXHWuo													250	273	https://t.co/FC6vCDbzxR	http://europeanecoscore.com/	europeanecoscore.com																					Twitter for iPhone
jsonBE1.csv	2021-06-26 18:18:59	Francisco Guerreiro 🇵🇹 🇪🇺	MEP @greensEFA. Vegan. Feminist. Animal Welfare/activist			en				32307080	Ooops!! Anything strange here? #nutriscore #mediterraneandiet #italianfood https://t.co/McSde5N3hX													75	98	https://t.co/McSde5N3hX	https://twitter.com/SouthsideMojo/status/1408822107849609226/photo/1	pic.twitter.com/McSde5N3hX						domain	65	Interests and Hobbies Vertical	Top level interests and hobbies groupings, like Food or Travel					31	42	nutriscore					Twitter for iPhone
jsonBE1.csv	2021-10-25 19:58:03					nl				548238536	Lotte Kopecky heeft een nutriscore B.																							domain	6	Sports Event													Twitter for Android
jsonBE1.csv	2021-10-26 00:52:39					es				1.40728e+18	lo de la nutriscore de abajo a la izquierda lo tienen muchos productos en Bélgica y Holanda pero no se que criterio sigue porque a una salsa de tomate le da una d y a una lasaña gigante congelada de un euro toda sospechosa le da una a	replied_to																	74	80	0.9811	Place	Bélgica												1.40728e+18				Twitter for Android
jsonBE1.csv	2021-02-07 11:54:10					pl				63194187	Jeszcze wsparty podatkiem cukrowym, lepszymi kompetencjami w zdrowiu (#healthliteracy), plus ulepszonymi etykietami, jako np. #nutriscore.. Nowy Europejski Plan Walki z Rakiem oraz Strategia #OdPolaDoStołu so dobrym startem w tym kierunku. #EUCancerPlan\n#EUFarm2Fork https://t.co/5uZ7pG09e3	quoted												267	290	https://t.co/5uZ7pG09e3	https://twitter.com/PsseRypin/status/1358364575318605826	twitter.com/PsseRypin/stat…														70	85	healthliteracy					Twitter for Android
jsonBE1.csv	2021-01-20 18:49:33					en				9.23183e+17	In Dec 2020, the 🇪🇺launched a user friendly IT solution called #FLIS. The benefits?\n\n✅Retrieve the mandatory🇪🇺#labelling indications for 87≠ categories \n\n✅Links to the relevant legal &amp; guidance📄\n\n✅Helps food business operators with the mandatory 🏷requirements\n\n#TweetADay\n👇 https://t.co/BnnRwtzGN8													278	301	https://t.co/BnnRwtzGN8	https://twitter.com/CatarinaPetisca/status/1351950002478854150/photo/1	pic.twitter.com/BnnRwtzGN8														63	68	FLIS					Twitter for iPhone
jsonBE1.csv	2021-11-18 19:57:27					it				1.11803e+18	Cominciamo a entrare nel merito, anche con nutrizionisti e docenti universitari, del pericolo che il #Nutriscore rappresenta per un certo modello virtuoso di #alimentazione!\n\nForse in #Italia ad alcuni manca ancora la consapevolezza della gravità di questa proposta!\n\n@FarmEurope https://t.co/S03H5lv4h3	quoted	BE	België	Feature	4.34734	50.8007	4.40339	50.8406	city	3060d31f8bf75f53	Elsene	Elsene, België	280	303	https://t.co/S03H5lv4h3	https://twitter.com/NoNutriscore/status/1461394080525602824	twitter.com/NoNutriscore/s…						domain	30	Entities [Entity Service]	Entity Service top level domain, every item that is in Entity Service should be in this domain	268	279	FarmEurope	2981793616	101	112	Nutriscore					Twitter for Android
jsonBE1.csv	2021-10-26 14:32:01					en				1.14926e+18	An appalling amendment stating that foie gras production respects AW also passed.\n\nUnfortunately, majority agreed that AW labelling for food products should only be voluntary, contradicting ENVI's view (mandatory).\n\nTwo amendments to ban the practice of killing male 🐣also fell.	replied_to																																	1.14926e+18				Twitter for Android
jsonBE1.csv	2021-10-27 00:31:50					es				2149479180	Algo está claro, el #Nutriscore suma más enemigos que aliados. Y el @Senadoesp se ha dado cuenta. Espero que el @mapagob anteponga un sistema prodefensor de la #DietaMediterránea a los intereses partidistas de @consumogob y @agarzon de una vez. @NoNutriscore https://t.co/vGy14I54sm	quoted												259	282	https://t.co/vGy14I54sm	https://twitter.com/salas_mercedes/status/1453034929688821760	twitter.com/salas_mercedes…						domain	10	Person	Named people in the world like Nelson Mandela	68	78	Senadoesp	712338200	20	31	Nutriscore					Twitter for iPhone
jsonBE1.csv	2021-07-08 21:17:24					nl				548238536	@quisthoudt @PGemengd Welke nutriscore heeft watermeloen?	replied_to																										12	21	PGemengd	1.25886e+18				2247726913				Twitter for Android
jsonBE1.csv	2021-03-17 06:05:51					fr				324397601	@montebourg @glacelamemere @UEFrance @EURACTIV Lien vers l’article https://t.co/fDp8kmAvjH	replied_to												67	90	https://t.co/fDp8kmAvjH	https://www.euractiv.fr/section/agriculture-alimentation/news/country-of-origin-food-labelling-will-be-mandatory-commission-clarifies/	euractiv.fr/section/agricu…										0	11	montebourg	69255422				324397601				Twitter for iPhone
jsonBE1.csv	2021-11-18 11:16:51					nl				11584152	@KoenVanderElst Ja kan iemand me uitleggen waarom verse gerookte zalm nutriscore D heeft en ontbijtgranen met toegevoegde suikers B? https://t.co/Gmia4F7KZU	replied_to	BE	België	Feature	4.88875	51.2626	4.98469	51.3953	city	52e0f89ce306d8eb	Turnhout	Turnhout, België	133	156	https://t.co/Gmia4F7KZU	https://twitter.com/zerre/status/1461277212032778241/photo/1	pic.twitter.com/Gmia4F7KZU										0	15	KoenVanderElst	1088943962				1088943962				Twitter for iPhone
jsonBE1.csv													BE	België	Feature	4.31399	50.7963	4.43695	50.9137	city	0653bb913c88c1ea	Brussel	Brussel, België											entity	1.26099e+18	Organic
jsonBE1.csv													BE	België	Feature	4.37891	50.8224	4.41148	50.8447	city	8f54da0b876827dc	Etterbeek	Etterbeek, België											entity	7.81975e+17	CPG
jsonBE1.csv																																		domain	46	Brand Category	Categories within Brand Verticals that narrow down the scope of Brands
jsonBE1.csv																																		entity	7.81975e+17	Beverage
jsonBE1.csv																																		entity	8.34828e+17	Generic Drinks	Generic Drinks
jsonBE1.csv																																		domain	67	Interests and Hobbies	Interests, opinions, and behaviors of individuals, groups, or cultures; like Speciality Cooking or Theme Parks
jsonBE1.csv																																		entity	8.50148e+17	Juice	Juice
jsonBE1.csv																																		entity	1.11569e+18	Alberto Garzón	Head of Izquierda Unida (Spain)	112	120	mapagob	280425258	160	178	DietaMediterránea
jsonBE1.csv																																		domain	35	Politician	Politicians in the world, like Joe Biden	210	221	consumogob	1.22426e+18
jsonBE1.csv																																		entity	1.11569e+18	Alberto Garzón	Head of Izquierda Unida (Spain)	224	232	agarzon	11904592
jsonBE1.csv																																						245	258	NoNutriscore	1.3287e+18
jsonBE1.csv																																		entity	1.10303e+18	Tokyo 2020 Summer Olympics	Tokyo 2020 Summer Olympics
jsonBE1.csv																																		entity	8.47901e+17	Cycling	Cycling
jsonBE1.csv																								274	297	https://t.co/xnYYqXHWuo	https://twitter.com/FrankVroonen/status/1420479477658816519/photo/1	pic.twitter.com/xnYYqXHWuo
jsonBE1.csv																																		domain	30	Entities [Entity Service]	Entity Service top level domain, every item that is in Entity Service should be in this domain
jsonBE1.csv																																		entity	8.60141e+17	Italian cuisine	Italian Cuisine
jsonBE1.csv																																										114	118	CAP
jsonBE1.csv																																										221	230	AGRIFISH
jsonBE1.csv																																						12	26	glacelamemere	1.21201e+18
jsonBE1.csv																																						27	36	UEFrance	484872080
jsonBE1.csv																																										110	120	labelling
jsonBE1.csv																																										265	275	TweetADay
jsonBE1.csv
jsonBE1.csv
jsonBE1.csv
jsonBE1.csv
jsonBE1.csv
jsonBE1.csv
jsonBE1.csv		☰ Arnaud Montebourg	Entrepreneur (https://t.co/h56NPJQSsR - https://t.co/RL8cVsmLQO - https://t.co/NtOHLaP5Oh).\nAncien ministre de l’économie.\nCandidat à l’élection #Présidentielle2022.
jsonBE1.csv		Alberto Garzón🔻	Economista. Ministro de Consumo del Gobierno de España. Coordinador de @IzquierdaUnida. Autor de '¿Quién vota a la derecha?' (Península, 2019)	Málaga																														entity	1.39294e+18	Olympic Cycling
jsonBE1.csv		Bertrand Wert	Work4 @EUEIC🚀#SMEs l Citoyen🇪🇺engagé♻️ l Chef de groupe @ecoloxl @groenelsene | @eelvbenelux l ConseillerConsulaire🇫🇷en🇧🇪 l Administrateur @memorializieu	Bruxelles, Belgique																																						254	266	EUFarm2Fork
jsonBE1.csv		Catarina Petisca	“Mama always said life is a box of chocolates” 🎥 Sorry Mr. Gump🏃🏻‍♂but there’s also broccoli 🥦 and Apple📱Think climate. Be kind. Live better.	Brussels, Belgium
jsonBE1.csv		Commission européenne 🇪🇺	Représentation en France de la Commission européenne. RT ne sont pas des agréments.\n\nFacebook : UEenFrance / Instagram : uefrance	Paris, France
jsonBE1.csv		Croatia in the EU	Official account of the Permanent Representation of Croatia to the European Union 🇭🇷🇪🇺 / Stalno predstavništvo Republike Hrvatske pri Europskoj uniji	Brussels, Belgium																																						191	205	OdPolaDoStołu
jsonBE1.csv		Dorota Sienkiewicz😷	Senior Policy Coordinator & Policy Platform lead for EuroHealthNet; tweets = personal take on Health Equity & Public Health, SEEDs, politics & commercial issues	Brussels, Bydgoszcz
jsonBE1.csv		EURACTIV	Independent, multilingual, pan-European, & constructive. We build the European public sphere. Become a EURACTIV supporter: https://t.co/5QW6JPHpnN | #eaDebates	Brussels
jsonBE1.csv		Francesco Tramontin	Virtuous Lobbyist and Evil Rocker. Group Public Policy at Ferrero. The views expressed are mine unless you convince me otherwise	Brussel, België																																						126	137	nutriscore
jsonBE1.csv		Frank Vroonen	#Limburg #Groen Schepen van #burgerparticipatie, #mobiliteit, #klimaat, ruimtelijke ordening, #landbouw, #wonen, #patrimonium #Alken	Alken, België																														entity	8.60134e+17	Cuisines	Cuisines
jsonBE1.csv		Geert De Busschere	Elke dag een nieuwe bio, soms ben ik het beu. Maar dan begin ik typen, wat me typeert, en dan bedenk ik: ja, dat ben ik.	Boechout																														domain	66	Interests and Hobbies Category	A grouping of interests and hobbies entities, like Novelty Food or Destinations					62	74	italianfood
jsonBE1.csv		Glace La Mémère	Marque équitable de glaces 100% bios fabriquées chez le paysan. La recette du circuit ultra-court ! #LaMémère
jsonBE1.csv		JOSÉ MARÍA CASTILLA	Good professional,better person @Univ_Villanueva @mcpc_unav @GSPMgwu #PDAP #Corporate & #PoliticalComm #Lobby #Agribusiness #Tauromaquia La verdad te hará libre	Brussels-Madrid-Córdoba																														domain	67	Interests and Hobbies	Interests, opinions, and behaviors of individuals, groups, or cultures; like Speciality Cooking or Theme Parks
jsonBE1.csv		King Koenah 🇧🇪 🌈	Pundamentalist. Kom erbij en zwans.																															domain	65	Interests and Hobbies Vertical	Top level interests and hobbies groupings, like Food or Travel
jsonBE1.csv		Marco Campomenosi	🇮🇹🏴󠁧󠁢󠁥󠁮󠁧󠁿Europarlamentare, Capodelegazione @LegaSalvini nel gruppo @IDParty_ - visita il mio sito 👉 https://t.co/BV9QYV4P0D										BE	België	Feature	4.49182	50.649	4.64836	50.6965	city	aa7f54ab4d11f8cb	Ottignies-Louvain-la-Neuve	Ottignies-Louvain-la-Neuve, Belgique											domain	30	Entities [Entity Service]	Entity Service top level domain, every item that is in Entity Service should be in this domain					184	191	Italia
jsonBE1.csv		Marija Vuckovic	Ministrica poljoprivrede	Republic of Croatia																																						240	253	EUCancerPlan
jsonBE1.csv		Ministerio de Agricultura, Pesca y Alimentación	Perfil oficial del Ministerio de Agricultura, Pesca y Alimentación del Gobierno de España. 🇪🇺🇪🇸 #UnaPACparaTODOS #AlimentáisNuestraVida	España																														domain	11	Sport	Types of sports, like soccer and basketball
jsonBE1.csv		Ministerio de Consumo	Perfil oficial del Ministerio de Consumo 📱 Gobierno de España 💼 Alberto Garzón - @agarzon	Paseo del Prado, 18 (Madrid)																														domain	11	Sport	Types of sports, like soccer and basketball
jsonBE1.csv		PSSE RYPIN😷	Państwowa Inspekcja Sanitarna\nCel dbanie o bezpieczeństwo we wszelkich aspektach życia i pracy człowieka. ❤️ nie zawsze 👍- czasem uwaga na problem. #zdrowie	Rypin, Kujawsko-Pomorskie
jsonBE1.csv		Senado de España	Canal de comunicación del Senado en la red. \nTambién en Instagram: https://t.co/2b79zT4mp5 ElSenadoTV en YouTube: https://t.co/sOcj1HEhFj																										84	90	0.934	Place	Holanda
jsonBE1.csv		Stiels ↗️ Nederland era 🇳🇱	Limburgse coronatwittervluchteling met lage hashtagtolerantie. Geretweet door @torfsrik, geblockt door @sven_nys. Raadslid Raad van Elverdinge. Pro Crastinator	Bronsgroen Eikenhout																																		37	46	EURACTIV	14808226
jsonBE1.csv		Véronique Langlais	Passionnée engagée ! Présidente du Syndicat des Bouchers de Paris.#écouter #réfléchir #agir #FrAgTw	Paris, France																														domain	66	Interests and Hobbies Category	A grouping of interests and hobbies entities, like Novelty Food or Destinations
jsonBE1.csv		ゼッレ	📖🇯🇵🎭🖼✈️🍽🏳️‍🌈 NL|FR|EN|DE 日本語を勉強しています trying to make sense of this world ♉️☀️♉️🌙♍️ 🌅	Brugge																														entity	10026299835	Coca-Cola
jsonBE1.csv		🍜	pichuchiando	Waalwijk, Nederland																														entity	8.25048e+17	Food	Food					43	61	mediterraneandiet
jsonBE2.csv		David Crunelle	art dude\nhttps://t.co/XSbFxN2KpP		nl		2860510937	🇩🇪 Ook Duitsland kiest voor de #nutriscore en volgt daarmee Frankrijk, Nederland, Spanje en ons land.\n\n🍏 De Nutri-Score maakt het makkelijker om de gezonde keuze te maken én moedigt bedrijven aan om de kwaliteit van hun voedsel nog te verbeteren (https://t.co/oQfirJwlzU) https://t.co/PlFWlhQqbn	quoted				BE	België	Feature	4.32564	50.8204	4.35869	50.8399	city	44f6ab36310a38db	Sint-Gillis	Sint-Gillis, België											entity	8.25048e+17	Food	Food					38	43	food
jsonBE2.csv					en		230700047	Smart mobility planner : https://t.co/i915iE9uF3 #MForum #DigitalWallonia by #stoomlink																										entity	8.47869e+17	Home & family	Hobbies and interests
jsonBE2.csv	2020-05-11 13:55:35				en	en	61186143	Sign the petition, 1 million signatures needed ! #Nutriscore \n\nhttps://t.co/0BBxCF9afz https://t.co/Z1J8EmnyIV	quoted	2274549138	Covid19 hasn't stopped the farm2fork strategy, now expected in a couple of weeks. I hope the crucial contribution of trade to food security and sustainability will be recognised. Also, I could do without the references to mandatory country of origin labelling. https://t.co/LgfDfG0bxi	quoted												261	284	https://t.co/LgfDfG0bxi	https://twitter.com/Food_EU/status/1259776992729346048	twitter.com/Food_EU/status…	0	6	0.3989	Person	Covid19	domain	123	Ongoing News Story	Ongoing News Stories like 'Brexit'												Twitter for Android
jsonBE2.csv		EU Food Safety	We are ensuring Safe Food 🍏, Animal Welfare 🐮 & Plant Health 🌱 within the 🇪🇺 through coherent #EUFarm2Fork measures	Brussels	en		1.18617e+18	Research reveals that #NutriScore enable people to make better nutritional decisions. We're conscious manufacturers have a role to play, that's why we're embracing this #Transparent and consumer-friendly labeling system to promote a #healthier #Diet. https://t.co/zRSkw9iAu3 https://t.co/zxzJOKt8Ua					BE	België	Feature	4.58885	50.6068	4.6661	50.6629	city	969f705d997de67b	Mont-Saint-Guibert	Mont-Saint-Guibert, Belgique																			180	193	healthydiets
jsonBE2.csv	2020-12-15 10:08:04	Dorota Sienkiewicz😷	Senior Policy Coordinator & Policy Platform lead for EuroHealthNet; tweets = personal take on Health Equity & Public Health, SEEDs, politics & commercial issues	Brussels, Bydgoszcz	fr	en	2331648078	Près de 40 parties prenantes dont @Test_Achats s'allient pour demander un #NutriScore européen\n#NutriScoreNow \nhttps://t.co/Fq9VUIZiLp https://t.co/iaSXr4I05O		1.07503e+18	Morning from Europa Building where #AGRIFISH is about to start. \n\nOn the agenda of the EU #Agriculture &amp; #Fisheries Ministers: \n\n🔷 Fishing opportunities 🎣\n🔷 Animal welfare 🦒 🦓 🦔 \n🔷 Front-of-pack nutrition #labelling \n\nState Secretary Zdravko Tušek will represent Croatia. https://t.co/Q8xGj2ZFpr		BE	België	Feature	4.37408	50.8385	4.37408	50.8385	poi	08f0f8822f165000	European Parliament - Building JAN	European Parliament - Building JAN	276	299	https://t.co/Q8xGj2ZFpr	https://twitter.com/CroatiaInEU/status/1338772806822207488/photo/1	pic.twitter.com/Q8xGj2ZFpr	13	18	0.7876	Place	Europa	domain	30	Entities [Entity Service]	Entity Service top level domain, every item that is in Entity Service should be in this domain					35	44	AGRIFISH					Twitter for iPhone
jsonBE2.csv					fr		2325149928	Le lauréat de la 6ème édition du prix Daniel Tixier est l’étiquette bien-être animal initiée par le groupe @Groupe_Casino ! Bravo aux gagnants pour cette belle initiative, et également à tous les finalistes. https://t.co/6aITBEzXCh																														16	29	MaximoTorero	720181994
jsonBE2.csv		@cancernurseEU	Supporting Cancer Nursing in Europe.	Brussels	fr		2333109386	Le #NutriScore s’adapte. L'huile d'olive classée C (et non plus D). Mise en cohérence avec les recommandations de santé publique https://t.co/q9wF3OOoRW via @Partager par Twitter																																		299	313	zeropollution
jsonBE2.csv	2020-08-24 14:55:53				fr	nl	2331648078	Le #NutriScore est un outil très pratique pour aider à manger plus sainement. Et pour qu'il soit présent sur tous les produits, signez la pétition : https://t.co/CuySYbnF8X https://t.co/zZkbI06BUm	quoted	347789129	Ja de #Nutriscore. Prioriteiten stellen is niet iedereen gegeven. https://t.co/6bYKLDv3BE	quoted												66	89	https://t.co/6bYKLDv3BE	https://twitter.com/Maggie_DeBlock/status/1297874372439441410	twitter.com/Maggie_DeBlock…														6	17	Nutriscore					Twitter for iPad
jsonBE2.csv		Jon Stone	Policy Correspondent at @Independent; I also do videos of nice cycle routes in London (link below) jon.stone@independent.co.uk	London	en		2893273911	Labeling schemes e.g. #NutriScore help consumers, especially those w/ less nutrition literacy, make healthier food choices, says @Food_EU's @anne_bucher. Fully agree, but let's not forget about the food environment in which people make choices, which must change too! #AgriOutlook https://t.co/BW0mPILd6R					BE	België	Feature	2.74354	50.9759	2.95108	51.1161	city	276299a99ec0cb96	Diksmuide	Diksmuide, België	158	181	https://t.co/hHe5uViVhX	https://twitter.com/SimonasSatunas/status/1334931323996286984/photo/1	pic.twitter.com/hHe5uViVhX														92	100	Council
jsonBE2.csv		peter camps	Nothing compares 2 Prince💜.	Hove, Belgium	fr		287725645	La 🇫🇷 de retour au Parlement 🇪🇺, c’était une promesse de campagne.\n\n3 commissions sont à présent présidées par les députés @Renaissance_UE :\n\n✅ Environnement @pcanfin \n✅ Défense @NathalieLoiseau \n✅ Pêche @Pierre_Ka\n\nTant reste à faire: climat, océans, défense européenne... https://t.co/dF94oeG00H	quoted				BE	België	Feature	4.37945	50.8439	4.37945	50.8439	poi	0fc2bb07cc95e000	Alcide de Gasperi Room	Alcide de Gasperi Room																			109	119	Fisheries
jsonBE2.csv					en		23919945	If I wasn't aware of the benefits of oily fish, or the limitations of nutrition labelling, would I have bought it after seeing #nutriscore "D"? 🐟 https://t.co/UReahb9bjy																					199	200	0.6088	Place	US					29	45	HousePriceMania	3342600166
jsonBE2.csv		HousePriceMania	Insane house prices have destroyed a generation or two.. and counting	HousePriceMania	en		135430876	I welcome @SKyriakidesEU commitment to include food labelling as part of the #FarmtoForkStrategy That's a clear ask of EU citizens and we are ready to have an EU wide front packaging information to help consumers to make the right choice					BE	België	Feature	4.37033	50.9912	4.54874	51.0786	city	6d6198a460e4073a	Mechelen	Mechelen, België	158	181	https://t.co/hHe5uViVhX	https://twitter.com/SimonasSatunas/status/1334931323996286984/photo/1	pic.twitter.com/hHe5uViVhX														82	91	Agrifish
jsonBE2.csv	2019-11-21 14:26:55				en	en	2333109386	Food firms in the Netherlands to go it alone on #NutriScore labelling scheme https://t.co/kvAEIAzRsL		23919945	If I wasn't aware of the benefits of oily fish, or the limitations of nutrition labelling, would I have bought it after seeing #nutriscore "D"? 🐟 https://t.co/UReahb9bjy													146	169	https://t.co/UReahb9bjy	https://twitter.com/5tina/status/1197506679249784832/photo/1	pic.twitter.com/UReahb9bjy						domain	30	Entities [Entity Service]	Entity Service top level domain, every item that is in Entity Service should be in this domain					127	138	nutriscore					Twitter for Android
jsonBE2.csv		Leeds Beckett	The official account of Leeds Beckett University (formerly Leeds Metropolitan). A thriving student community in the 💜 of Yorkshire.	Leeds, UK	fr		24744541	De nouvelles études associent les aliments industriels à une augmentation du risque de maladies cardio-vasculaires et de prise de poids. https://t.co/8oOEBzFCmN | par @pascale_santi &amp; @MathiGerard																																		136	146	labelling
jsonBE2.csv		Bert	L'Inconnu du Like. Main plus légère et grave qu’une veuve. Beaucoup trop souvent sur Twitter, mais avec la caution de ma psy. Votre meilleur fan. 🇪🇺	Bruxelles	en		181581190	@jodamiromanov @HousePriceMania @joncstone Nope, because we'll have to come of the the ECHR first - you do not have to be in the EU to belong to that, and it would be embarrassing if we pulled out whilst Russia is still in it.	replied_to				BE	België	Feature	4.2441	50.807	4.34027	50.8502	city	2eb454a27a749770	Anderlecht	Anderlecht, België																			214	224	TweetADay
jsonBE2.csv		ICOS Brussels	@agraham92, Brussels representative of @ICOSDublin, an Umbrella organisation for co-operatives in Ireland.	Brussels, Belgium	en		2333109386	@giamma71 @agrinsieme @coldiretti @Confagricoltura @Cia_Agricoltura @matteosalvinimi Please ask to CocaCola, PepsiCo, Mars, Mondelez, Unilever, Ferrero, Kelloggs, Kraft, General Mills and many others multinational companies why if #NutriScore favours them, they always refuse to display Nutri-Score on their products and even why they try to torpedo it ...	replied_to																									entity	8.47869e+17	Home & family	Hobbies and interests	9	23	SKyriakidesEU	2476130260
jsonBE2.csv	2021-01-04 11:36:16	Catarina Petisca	“Mama always said life is a box of chocolates” 🎥 Sorry Mr. Gump🏃🏻‍♂but there’s also broccoli 🥦 and Apple📱Think climate. Be kind. Live better.	Brussels, Belgium	en	en	7.64145e+17	@davidcrunelle "Openforasurprise".	replied_to	9.23183e+17	#DYK how to read a food label and why #food #labelling is important?\n\n➡️Food labels help us understand what’s in packaged foods\n\n➡️Some information is mandatory, other is voluntary \n\n➡️Helps take better decisions\n\n#TweetADay #FIC #EULabelling #HealthyLiving #Food \n\n👇 https://t.co/YTSwrsB6zG		BE	België	Feature	4.31399	50.7963	4.43695	50.9137	city	0653bb913c88c1ea	Brussel	Brussel, België	268	291	https://t.co/YTSwrsB6zG	https://twitter.com/CatarinaPetisca/status/1346042759120084992/photo/1	pic.twitter.com/YTSwrsB6zG						domain	65	Interests and Hobbies Vertical	Top level interests and hobbies groupings, like Food or Travel					0	4	DYK					Twitter for iPhone
jsonBE2.csv		Test Achats	Association sans but lucratif pour la défense des droits des consommateurs: Expert, Indépendant, Proche de vous!	Brussels	en		59741138	@cuthbertneil That’s because, valuable as tree-planting definitely is, it doesn’t challenge the fossil fuel vested interests.	replied_to																									entity	10026299835	Coca-Cola
jsonBE2.csv		Cereal Partners Worldwide (CPW)			und		146464833	@bimbombram N = 1.	replied_to																									domain	47	Brand	Brands and Companies
jsonBE2.csv	2019-12-11 09:57:23	Ksenija Simovic	#EU junkie & #agri lover! From farm to🍴& not forgetting to tweet in between. Comms manager @COPACOGECA & coordinating @YFPNBrussels. Views are mine🙂🇪🇺🇷🇸	Brussels, Belgium	en	en	2893273911	#ProNutriscore 2,286 signatures to go to reach 50,000! Let's do it over the weekend?\nYou can sign the European Citizens Initiative calling for #Nutriscore to become mandatory across the #EU here: https://t.co/uwt2r6hYAa https://t.co/P1v0A8DOP6		873630662	We have seen that initiatives like #Nutriscore have positive impact on consumers’ inequalities when it comes to different level of nutritional knowledge, believes Anne Bucher #AgriOutlook @NestleEU https://t.co/ytOUzmyzL6													199	222	https://t.co/ytOUzmyzL6	https://twitter.com/OliMedjugorac/status/1204686607451865088/photo/1	pic.twitter.com/ytOUzmyzL6	164	174	0.9775	Person	Anne Bucher					189	198	NestleEU	2217908346	36	47	Nutriscore					Twitter for iPhone
jsonBE2.csv		Simonas Satunas	Permanent Representative of Lithuania to EU (a.i.), Ambassador, Lithuanian Permanent Representation to EU. Freedom is not Free!	Brussels, Belgium	en		2874880006	#EUFarm2Fork will propose ways to ensure food security and sustainability of EU farming beyond the #coronavirus pandemic.\nHear the latest from Commissioner @SKyriakidesEU this evening at 1700hrs: https://t.co/e37UubgFvD \n\n#EUGreenDeal #StrongerTogether https://t.co/V13mIlilw8					BE	België	Feature	4.45817	51.1304	4.51054	51.1633	city	f4c64f1c6191c95b	Hove	Hove, België																			230	242	EULabelling
jsonBE2.csv	2019-09-10 18:28:58					en				2824971037	👏🏼👏🏼👏🏼The priorities for the future Commissionner for #health 🇪🇺\n✅supply of affordable medicines \n✅better communication on #vaccines \n✅improvement of consumer information #Nutriscore \n✅Promotion of Europe’s Beating #Cancer Plan\n@EU_Health @MAC_MEPs @EP_Environment																		206	211	0.8218	Place	Europe					228	238	EU_Health	606325697	54	61	health					Twitter for iPhone
jsonBE2.csv	2019-07-05 08:03:01	tpistoleeke	croissanterie in hartje Tienen. Leuvensestraat 93 Kom gerust eens hallo zeggen bij ons op twitter..			nl				712627230	Yes! Het is officieel, ons vita+ plus scoort op de nutri-score een A! #Gezond #echtlekker #nutriscore @ 't Pistoleeke https://t.co/Qv5bSjeN88													118	141	https://t.co/Qv5bSjeN88	https://www.instagram.com/p/BzhjjQlo0vx/?igshid=2ipw2tauc75x	instagram.com/p/BzhjjQlo0vx/…														70	77	Gezond		Point	4.93226201	50.80975758	Instagram
jsonBE2.csv	2019-11-05 20:03:47	Coldiretti	La Coldiretti è la principale Organizzazione degli imprenditori agricoli a livello nazionale ed europeo.	Roma		nl				267631801	vreemd hoe weinig hier rond gehoord of gelezen wordt. #preventie vorm geven vanuit #retailers op een vrij #evidencebased\nwijze. benieuwd naar resultaten van deze actie op aankoopgedrag\n\nbravo @DelhaizeBelgium\n\nhttps://t.co/vvzFufSAzp\n\n#gezondeten #gezondereflex													210	233	https://t.co/vvzFufSAzp	https://www.distrifood.nl/buitenland/nieuws/2019/09/delhaize-introduceert-nutriscore-korting-101126845	distrifood.nl/buitenland/nie…										192	208	DelhaizeBelgium	347766008	54	64	preventie					Twitter for Android
jsonBE2.csv	2020-12-04 19:43:24	Anthony Zacharzewski	Trying to make European democracy work. “Refreshingly free of the usual platitudes.” Founder of @demsoc. 🇵🇱🇬🇧🇪🇺	Bruxelles, Belgique		en				263972933	Still in #Coreper with nice "chocolade" from #Sinterklaas from @NLatEU discussing #Agrifish #Council Conclusions on front-of-pack nutrition labelling @EU2020 https://t.co/hHe5uViVhX		BE	België	Feature	4.37552	50.844	4.37552	50.844	poi	07d9e79188c88000	Thon Hotel EU	Thon Hotel EU	158	181	https://t.co/hHe5uViVhX	https://twitter.com/SimonasSatunas/status/1334931323996286984/photo/1	pic.twitter.com/hHe5uViVhX						domain	30	Entities [Entity Service]	Entity Service top level domain, every item that is in Entity Service should be in this domain	63	70	NLatEU	3063825971	9	17	Coreper					Twitter for Android
jsonBE2.csv	2019-11-22 09:38:16	EuropeActive	We are the leading voice and not-for-profit organisation representing the European #fitness and #physicalactivity sector. More People | More Active | More Often	Brussels		fr				92308710	Selon une enquête de @Test_Achats les Belges mangent plutôt mal, 1/5 le reconnaît ! #Nutriscore peut les aider. Vers une généralisation en Europe ... #Pronutriscore https://t.co/no1UnRiDBp	quoted												165	188	https://t.co/no1UnRiDBp	https://twitter.com/JulieTestAchats/status/1197790226468528128	twitter.com/JulieTestAchat…										21	33	Test_Achats	83814343	84	95	Nutriscore					Twitter for Android
jsonBE2.csv	2019-11-06 17:56:56	EU Health	EU Commission's DG Health & Food Safety (SANTE). We are building the foundations of a stronger European #HealthUnion RT ≠ endorsement. Food tweets @Food_EU	Brussels, Europe		und				1560926802	S @NestleEU oko uvođenja "semafor" #Nutriscore sustava na pakiranja hrane i pića.Ako @VladaRH preporuči Nutriscore, kao ESP, FRA, BEL, GER, Nestle će na proizvode i na RH tržištu staviti oznake koje kupcu signaliziraju nutritivnu vrijedost. Preporuka košta 0 kuna #obesity https://t.co/ek6AhW34UQ													273	296	https://t.co/ek6AhW34UQ	https://twitter.com/BiljanaBorzan/status/1192123711857537024/photo/1	pic.twitter.com/ek6AhW34UQ						domain	45	Brand Vertical	Top level entities that describe a Brands industry	2	11	NestleEU	2217908346	35	46	Nutriscore					Twitter for Android
jsonBE2.csv	2019-05-23 11:43:41					en				237026306	Question raised at #ECPAConf19 whether retailers perpetuate the myth that some types of food production are not safe through labelling or marketing? Do they? @cropprotection #WithOrWithout																							domain	66	Interests and Hobbies Category	A grouping of interests and hobbies entities, like Novelty Food or Destinations					19	30	ECPAConf19					Twitter for iPhone
jsonBE2.csv	2019-12-05 18:17:23	Christina Sadler	British Brexit-Belgian. Communicating science on food and health @EUFIC. Postgraduate researcher @UniOfSurrey.	Brussels, Belgium		en				436870149	Of course it’s easily readable. But it’s framing certain ingredients as “unhealthy per se” and others as paradise in every size of dose. That’s the problem #Nutriscore @SugarBeetEurope @SugarEurope https://t.co/gXQqFK3Ve1	quoted												198	221	https://t.co/gXQqFK3Ve1	https://twitter.com/CPW_Global/status/1201797281512611841	twitter.com/CPW_Global/sta…										168	184	SugarBeetEurope	1546442256	156	167	Nutriscore					Twitter for iPhone
jsonBE2.csv	2019-10-09 15:51:39	Sarne De Vliegher	Professor @UGent|@MteamUGent-@MEX_eu-M²|#diergeneeskunde-#ondernemerschap-#gezin-#natuur-#Zwalm-#Klara-#RSCA|op weg met @SofieBhatti|eigen opinies	Zwalm, België		und				1560926802	Nakon Francuske, Begije te Španjolske i Njemačka uvodi #Nutriscore "semafor" sustav označavanja hrane koji kupcu na krajnje jednostavan način pokazuje nutritivnu vrijednost proizvoda https://t.co/aVoCdZQGTH													183	206	https://t.co/aVoCdZQGTH	https://www.foodnavigator.com/Article/2019/10/01/Germany-plans-to-introduce-Nutriscore-This-is-a-milestone-in-nutrition-policy	foodnavigator.com/Article/2019/1…														55	66	Nutriscore					Twitter for Android
jsonBE2.csv	2020-01-20 15:56:50					und				1560926802	Min. Kujundžić na @EP_Environment na pitanja MEPova o označavanju nutritivne vrijednosti hrane i tzv. semafor etiketa: "U svrhu prevencije debljine i bolesti potrebno je naglašeno označavati kalorijsku vrijednost hrane". Slažem se, a RH ništa ne košta preporučiti #Nutriscore																											18	33	EP_Environment	951333319	264	275	Nutriscore					Twitter for Android
jsonBE2.csv	2020-02-18 11:18:00					en				7.49874e+17	It’s back to the EP this morning for @EP_Environment where Commissioner for Health &amp; Food Satefy @SKyriakidesEU is discussing #Farm2Fork strategy which will introduce new requirements on food labelling, food waste, animal welfare and input use as part of the #EUGreenDeal https://t.co/7VkSVrfRA5													278	301	https://t.co/7VkSVrfRA5	https://twitter.com/ICOS_BXL/status/1229711656781066240/photo/1	pic.twitter.com/7VkSVrfRA5										38	53	EP_Environment	951333319	132	142	Farm2Fork					Twitter for iPhone
jsonBE2.csv	2020-02-18 10:46:00					it				1368850908	Il modello del #nutriscore è un sistema ingannevole che danneggia il #madeinItaly. Lavoriamo a un sistema equo e chiaro che protegga consumatori e produttori. Ne ho parlato stamattina all'evento "il Made in Italy in Europa", qui al Parlamento Europeo con la Confederazione #Aepi. https://t.co/Adx05HIqeT													280	303	https://t.co/Adx05HIqeT	https://twitter.com/FMCastaldo/status/1229703601376956417/photo/1	pic.twitter.com/Adx05HIqeT						domain	88	Political Body	A section of a government, like The Supreme Court					15	26	nutriscore					Twitter for Android
jsonBE2.csv	2020-09-04 08:29:48	Véronique Trillet-Lenoir 🇪🇺 🇫🇷	Eurodéputée MEP @EP_Environment @EP_socialaffairs @EP_BeatCancer @RenewEurope @Renaissance_UE Cancérologue @UnivLyon1 Ex conseillère régionale @LREM_AURA			und				7.60168e+17	https://t.co/MbxxMijMW7													0	23	https://t.co/MbxxMijMW7	https://www.businessinsider.com/brexit-food-companies-warn-boris-johnson-has-missed-labelling-deadline-2020-9	businessinsider.com/brexit-food-co…																					Twitter for iPhone
jsonBE2.csv	2019-06-20 18:34:13	Compere Philippe	Expert @adn_wallonie @digitalwallonia Broadband connectivity projects Giga Region , SmartRegion & https://t.co/6B3oripflR	Namur, Belgique		en				349027336	Good news! More and more companies using NutriScore in Europe. But to make it truly effective *all* companies should have to! Sign the petition to make this label mandatory in the EU here: https://t.co/VBPaF0il4K https://t.co/cFHSzHaItq	quoted												189	212	https://t.co/VBPaF0il4K	https://eci.ec.europa.eu/009/public/#/initiative	eci.ec.europa.eu/009/public/#/i…	41	50	0.4042	Organization	NutriScore																Twitter for iPhone
jsonBE2.csv	2019-06-27 14:36:06	CIWF Agro	Placer le bien-être animal au cœur de l'industrie agroalimentaire. @CIWF_FR travaille avec les producteurs, transformateurs, distributeurs et la restauration.	Paris, France		fr				8.80743e+17	Fier d’avoir reçu ce Prix qui a déjà récompensé nutriscore, @OpenFoodFactsFr @CQuiLePatron! Merci à @CIWF_Agro @OABA_Off @fondationLFDA https://t.co/Gg0I1KwQU6	quoted												136	159	https://t.co/Gg0I1KwQU6	https://twitter.com/ESSEC_PGC/status/1143921741070249991	twitter.com/ESSEC_PGC/stat…						domain	45	Brand Vertical	Top level entities that describe a Brands industry	60	76	OpenFoodFactsFr	584043179								Twitter for iPhone
jsonBE2.csv	2020-04-28 13:09:46	Schams El Ghoneimi	EU Foreign Policy Advisor @RenewEurope 🇪🇺 🇫🇷 European Parliament مستشار بالبرلمان الأوروبي CoFounder #SyriansGotTalent Tweets = mine only	Brussels / Paris		fr				271381873	Danone aussi en faveur d’un #NutriScore européen, pour aider les citoyens à faire des choix plus sains #OnePlanetOneHealth https://t.co/no1Cas29SW	quoted												123	146	https://t.co/no1Cas29SW	https://twitter.com/JulieTestAchats/status/1255071750141902849	twitter.com/JulieTestAchat…						domain	45	Brand Vertical	Top level entities that describe a Brands industry					28	39	NutriScore					Twitter for iPhone
jsonBE2.csv	2019-11-08 00:25:46	Eurodéputé·e·s EE 🌍	🇪🇺 Le compte des eurodéputé·e·s Europe Écologie au Parlement européen. Membres des @greensEFA.\n#Climat #Europe #Écologie 🇪🇺🌍🌻	Bruxelles-Strasbourg		fr				92308710	Comme moi signez la pétition pour rendre obligatoire le Nutriscore en Europe https://t.co/Cc4mdG2Cif #PRONUTRISCORE https://t.co/hMtGAknkrC													77	100	https://t.co/Cc4mdG2Cif	http://www.pronutriscore.org	pronutriscore.org														101	115	PRONUTRISCORE					Twitter for Android
jsonBE2.csv	2019-10-02 10:11:51					und				1560926802	Buduća EU povjerenica za zdravlje i hranu je na saslušanju kazala kako se razmatra upotreba tzv. "semafor" oznaka na pakiranju hrane - boja signalizira prehrambenu vrijednost. Neke EU zemlje vec koriste #Nutriscore sustav, RH moze biti sljedeća 🚥 https://t.co/c97OkyE69T													248	271	https://t.co/c97OkyE69T	https://www.vecernji.hr/biznis/eu-razmatra-uvo-enje-semafor-sustava-za-hranu-sto-to-znaci-1349447	vecernji.hr/biznis/eu-razm…														203	214	Nutriscore					Twitter for Android
jsonBE2.csv	2019-11-07 14:49:23					fr				94072704	Afficher clairement les qualités nutritives des produits aidera les consommateurs de l'UE à faire des choix plus sains ! \n\nCe matin nous sommes allé sur le terrain pour montrer notre soutien à l'initiative citoyenne européenne #Nutriscore\nPour signer =&gt; https://t.co/xV4Q8Xryae https://t.co/8Jz2YXLBwJ													257	280	https://t.co/xV4Q8Xryae	http://www.pronutriscore.org	pronutriscore.org														227	238	Nutriscore					Twitter Web Client
jsonBE2.csv	2019-07-15 13:34:09	James Mackenzie	Helps good causes with PR/PA, inc @yougotthebottle @savekelp. Ex head of media @GreenMSPs. While I’m alive I’ll make tiny changes to earth. He. Pro 🌍🚩🏳️‍⚧️🐱	Edinburgh		nl				366481141	105 op een dieet van spek en goei boter.#nutriscore 👇\n\nhttps://t.co/7OVlsSwRoO …													56	79	https://t.co/7OVlsSwRoO	https://m.hln.be/in-de-buurt/duffel/oudste-duffelaar-blaast-105-kaarsjes-uit-haar-geheim-hard-werken-en-veel-spek-met-goeie-boter-eten~aef2e205/?fbclid=IwAR1YldX1RQTCqmbJWY0tcEdnkbpsOxqWh52uAIcjmWsIKfTfvKIyqGAk2gI&referer=https%3A%2F%2Fwww.facebook.com%2F	m.hln.be/in-de-buurt/du…														40	51	nutriscore					Twitter Web Client
jsonBE2.csv	2020-12-28 20:25:09	Kassia				pt				45308585	@UmbertoSettant1 Nutriscore : K https://t.co/bFt9ynWYxs	replied_to	BE	België	Feature	4.37481	50.839	4.37481	50.839	poi	0fc3468dffd55001	Europees Parlement / Parlement Européen	Europees Parlement / Parlement Européen	32	55	https://t.co/bFt9ynWYxs	https://twitter.com/davidcrunelle/status/1343639141955891212/photo/1	pic.twitter.com/bFt9ynWYxs										0	16	UmbertoSettant1	7.64145e+17				7.64145e+17				Twitter for Android
jsonBE2.csv	2019-12-11 09:47:43					en				1.108e+18	@TassosHaniotis @MaximoTorero and Hiromichi Matsushima together on a panel to exchange on the future trends in food consumption. Food labelling, consumers education, quality and safety are just some of the issues mentioned during the debate #AgriOutlook https://t.co/kdbE1RMqDk													254	277	https://t.co/kdbE1RMqDk	https://twitter.com/Herbalife_EU/status/1204684173061107712/photo/1	pic.twitter.com/kdbE1RMqDk	34	53	0.6429	Person	Hiromichi Matsushima					0	15	TassosHaniotis	3176583227	241	253	AgriOutlook	3176583227				Twitter for iPhone
jsonBE2.csv	2019-07-15 15:38:48					nl				366481141	@sdevlieg Het is anekdotiek, maar dat is duidelijk voor iedereen. Wat is de nutriscore? Zeer onduidelijk. Pretence of knowledge.	replied_to																										0	9	sdevlieg	146464833				146464833				Twitter Web Client
jsonBE2.csv	2020-02-19 13:50:58					fr				2824971037	@SchamsEU @Renaissance_UE @pcanfin @NathalieLoiseau @Pierre_Ka Et beaucoup + à faire si on n’oublie pas que @pcanfin préside commission «#environnment, #sante publique &amp; #securite alimentaire» et @NathalieLoiseau commission #securite/défense»❗️\n#EUcancerplan #Nutriscore #prevention #Farmtofork\n#zeropollution #Coronavirus #europethatprotects	replied_to																						domain	10	Person	Named people in the world like Nelson Mandela	0	9	SchamsEU	287725645	137	150	environnment	287725645				Twitter for iPhone
jsonBE2.csv	2019-12-11 18:10:23	Anne Bucher				en				1.06596e+18	@Perrin_Cam @Food_EU @anne_bucher The #NutriScore doesn’t help to the #mediterranean #consumers. This mechanism says that one @CocaCola has a B and one bottle of #OliveOil @AceitesOlivaES has a D. \n\nSometimes simplifying the system is not the fairest thing to do.	replied_to																						domain	45	Brand Vertical	Top level entities that describe a Brands industry	0	11	Perrin_Cam	2893273911	38	49	NutriScore	2893273911				Twitter for iPhone
jsonBE2.csv	2020-02-18 23:54:05					en				32307080	@pcanfin @SKyriakidesEU Harmonised labelling across Europe is a must to avoid confusion. The right choice? ... not sure... On nutrition labelling is really about nudging the right consuming behaviour and educating. And on sustainability... there should be no consumer choice on sustainability negatives	replied_to																	52	57	0.9944	Place	Europe	domain	30	Entities [Entity Service]	Entity Service top level domain, every item that is in Entity Service should be in this domain	0	8	pcanfin	135430876				135430876				Twitter for iPhone
jsonBE2.csv	2020-06-05 07:45:41					en				15662428	@PamCrossland @jodamiromanov @HousePriceMania @joncstone Nothing in the ECHR about labelling food. It’s all EU law and now the U.K. is out the government will do what it likes, or, on this, what the US government tells them. Your best hope is for strong level playing field rules with the EU...	replied_to																	127	130	0.7357	Place	U.K.					0	13	PamCrossland	181581190				181581190				Twitter for iPhone
jsonBE2.csv	2019-07-10 10:36:53					en				162015571	@mrjamesmack BTW we’re in #Belgium 🇧🇪 and interesting to see deposit returns on bottles, amazing cycling facilities and better food nutrition labelling etc.	replied_to																						domain	30	Entities [Entity Service]	Entity Service top level domain, every item that is in Entity Service should be in this domain	0	12	mrjamesmack	59741138	26	34	Belgium	59741138				Twitter for iPhone
jsonBE2.csv	2019-07-18 10:39:15					en				32307080	@HercbergS @giamma71 @agrinsieme @coldiretti @Confagricoltura @Cia_Agricoltura @matteosalvinimi No torpedoes. At Mondelez we express preferences like everyone should in a very transparent manner. And @HercbergS should stop torpedoing any opinion different from his and his nutriscore baby. We are very happy to support the debate towards a common European approach to FOPL	replied_to																						domain	10	Person	Named people in the world like Nelson Mandela	0	10	HercbergS	2333109386				2333109386				Twitter for iPhone
jsonBE2.csv	2019-11-21 15:52:53	Prof Sue Backhouse	Professor & Director of Research || Curious about sport & human behaviour || https://t.co/EhK7qjm7ad || #integrity #welfare #sport #Yorkshire			en				46849519	@5tina I actually asked why some merkel filets had a D grade on #nutriscore and other merkel filets a grade C. They explained it was due to the content of salt. Now I still fear some consumers will not buy some very healthy foodstuffs due to red mark 🛑 😒	replied_to																										0	6	5tina	23919945	64	75	nutriscore	23919945				Twitter for Android
jsonBE2.csv	2020-01-28 20:40:46					pl				63194187	.@NIZP_PZH opracowuje nowe zasady zdrowego zywienia, zeby ulatwic konsumentom dokonywanie lepszych wyborow podczas zakupow spozywczych i komponowania posilkow. Czy czas na #nutriscore w Polsce? https://t.co/smzGWCqY49													194	217	https://t.co/smzGWCqY49	http://www.rynekzdrowia.pl/Uslugi-medyczne/Piramida-zywieniowa-cenna-ale-czy-czytelna-Powstana-nowe-przekazy-nt-zdrowego-zywienia,202121,8.html	rynekzdrowia.pl/Uslugi-medyczn…										1	10	NIZP_PZH	2180180346	172	183	nutriscore					Twitter for Android
jsonBE2.csv	2019-06-05 12:49:32					fr				230700047	... et bientôt un Mobiscore @stoomlink sur le modèle du nutriscore...	replied_to																										28	38	stoomlink	1.14161e+18				230700047				Twitter for iPhone
jsonBE2.csv	2019-11-10 10:21:31					fr				92308710	#Pronutriscore #Nutriscore \n\nVotre signature pour un système d'info nutritionnelle généralisé en Europe ... https://t.co/WvNKTI1PXH	quoted												108	131	https://t.co/WvNKTI1PXH	https://twitter.com/ivomechels/status/1193276884391546880	twitter.com/ivomechels/sta…														0	14	Pronutriscore					Twitter for Android
jsonBE2.csv	2020-11-07 22:55:43	Jukka Likitalo	Secretary General @Eucolait \nDairy, trade & EU affairs \nAll opinions are my own	Brussels, Belgium		en				63194187	#nutriscore very appealing to my almost 8 year old girl. She's been playing with it in 'her shop'. She got it all very quickly so why not roll out EU wide to help consumers choose #healthydiets? #nutritionlabelling #EUFarm2Fork https://t.co/WA8WQuFMDk		BE	België	Feature	4.85129	50.7519	5.01948	50.8643	city	5310ce6a2db4edec	Tienen	Tienen, België	228	251	https://t.co/WA8WQuFMDk	https://twitter.com/dorsie78/status/1325195250600607744/photo/1	pic.twitter.com/WA8WQuFMDk														0	11	nutriscore					Twitter for Android
jsonBE2.csv	2019-06-29 10:29:56	OpenFoodFacts fr	Un projet collaboratif pour créer une base de données libre et ouverte sur les produits alimentaires.	Saint-Maur des Fossés, France		en				92308710	#Nutriscore Stronger Together Sign and Share Please https://t.co/AsBGTt126B	quoted												53	76	https://t.co/AsBGTt126B	https://twitter.com/Perrin_Cam/status/1144521776866742272	twitter.com/Perrin_Cam/sta…														0	11	Nutriscore					Twitter for Android
jsonBE2.csv	2019-06-26 07:47:16					fr				92308710	#Nutriscore privilégié par @Nestle en Europe, la bonne nouvelle du jour ... Merci de signer la pétition européenne pour généraliser tous ensemble le système @beuc @UFCquechoisir @Test_Achats https://t.co/vZrzNSTop1													192	215	https://t.co/vZrzNSTop1	https://eci.ec.europa.eu/009/public/#/initiative	eci.ec.europa.eu/009/public/#/i…						domain	45	Brand Vertical	Top level entities that describe a Brands industry	27	34	Nestle	23085995	0	11	Nutriscore					Twitter for Android
jsonBE2.csv	2019-09-19 09:45:58					fr				92308710	#Nutriscore évolue et c'est tant mieux ... https://t.co/iC32s3Emqk	quoted												43	66	https://t.co/iC32s3Emqk	https://twitter.com/HercbergS/status/1174573128766369792	twitter.com/HercbergS/stat…						domain	46	Brand Category	Categories within Brand Verticals that narrow down the scope of Brands					0	11	Nutriscore					Twitter for Android
jsonBE2.csv	2019-11-07 12:03:19					fr				92308710	#Nutriscore \nUn système harmonisé d'info nutritionnelle dans toute l'Europe...\n\nSoutien de parlementaires européens ...\n\nVotre soutien : https://t.co/wgdY8I59fE https://t.co/P2QW6DBYaM													138	161	https://t.co/wgdY8I59fE	http://www.pronutriscore.eu	pronutriscore.eu														0	11	Nutriscore					Twitter for Android
jsonBE2.csv	2020-01-01 10:53:40	ASAJA in Brussels 🇪🇸🚜🇪🇺	Permanent Representation of @AsajaNacional (#Spanish #Farmers #Union) to the #European #Union. Official account of #ASAJA #Brussels managed by @JMCASTILLABARO.	Rue de Treves 61, Brussels		en				92308710	#Nutriscore #Ryanair #ThomasCook #StopFraisBancaires #TropViteUsé #IndiceTA \n\nWhat a year 2019, is'nt it ?\nBut 20 20 could be even better ...\nBEST WISHES for #ConsumerProtection https://t.co/qtu2kr9G66													179	202	https://t.co/qtu2kr9G66	https://twitter.com/MrConso/status/1212310916383031297/photo/1	pic.twitter.com/qtu2kr9G66						domain	45	Brand Vertical	Top level entities that describe a Brands industry					0	11	Nutriscore					Twitter for Android
jsonBE2.csv	2019-05-30 10:57:12	Stoomlink	We believe greener mobility has many opportunities to offer. Our mission is to help cities & companies leverage those - thanks to innovative digital products.	Bruxelles, Belgique		fr				92308710	#Food Convaincu aussi ... Notamment pour cela que @Test_Achats plaide pour #Nutriscore à haute valeur ajoutée pour les aliments transformés et une meilleure information sur additifs voir une interdiction de certains (ex. E171) Le combat continue ! @SLauryssen @JulieTestAchats https://t.co/eUU5HYatKh	quoted												277	300	https://t.co/eUU5HYatKh	https://twitter.com/lemondefr/status/1134000955010289664	twitter.com/lemondefr/stat…						domain	65	Interests and Hobbies Vertical	Top level interests and hobbies groupings, like Food or Travel	50	62	Test_Achats	83814343	0	5	Food					Twitter for Android
jsonBE2.csv	2019-11-13 10:28:12					en				515718152	#FAIR Project partner @susanbackhouse from @leedsbeckett is now updating attendees on the outcomes on actions to improve #testing &amp; #labelling for food and supplements intended for #sportspeople⚽🎾🏋🏀\n\n#AntiDopingForum #LetsBEACTIVE https://t.co/PEjcgrJnTf													235	258	https://t.co/PEjcgrJnTf	https://twitter.com/Europe_Active/status/1194547499937271809/photo/1	pic.twitter.com/PEjcgrJnTf										22	37	susanbackhouse	612948933	0	5	FAIR					Twitter for Android
jsonBE2.csv	2020-02-18 11:48:08					en				439224883	"Consumers have the right to clear information on what they buy from the shelf" says @SKyriakidesEU. \n\nFood labelling, tackling challenges of food waste and food welfare will be prioritized for forming a sustainable food chain strategy.\n\n#FoodSafety\n#Health \n#EUCancerPlan https://t.co/4AplJGimET													273	296	https://t.co/4AplJGimET	https://twitter.com/cancernurseEU/status/1229719238354624512/photo/1	pic.twitter.com/4AplJGimET										85	99	SKyriakidesEU	2476130260	238	249	FoodSafety					Twitter for Android
jsonBE2.csv	2020-02-18 11:47:33	NIZP PZH - PIB	Narodowy Instytut Zdrowia Publicznego PZH - Państwowy Instytut Badawczy jest instytucją działającą w obszarze zdrowia publicznego.	Warszawa, Polska		en				9.21435e+17	"Consumers have the right to clear information on what they buy from the shelf" says @SKyriakidesEU. \n\nFood labelling, tackling challenges of food waste and food welfare will be prioritized for forming a sustainable food chain strategy.\n\n#FoodSafety\n#Health \n#EUCancerPlan https://t.co/jsm4886Nzk													273	296	https://t.co/jsm4886Nzk	https://twitter.com/eleonoravard/status/1229719092694786049/photo/1	pic.twitter.com/jsm4886Nzk										85	99	SKyriakidesEU	2476130260	238	249	FoodSafety					Twitter for Android
jsonBE2.csv													BE	België	Feature	4.38061	50.8426	4.38061	50.8426	poi	11c144459814c00b	Europa Building	Europa Building																			44	54	labelling
jsonBE2.csv													BE	België	Feature	4.37891	50.8224	4.41148	50.8447	city	8f54da0b876827dc	Etterbeek	Etterbeek, België																			258	263	Food
jsonBE2.csv																																						46	56	joncstone	23813407
jsonBE2.csv																																		entity	1.2207e+18	COVID-19
jsonBE2.csv																																		entity	7.81975e+17	CPG						103	122	OnePlanetOneHealth
jsonBE2.csv																																		entity	10044370067	Danone
jsonBE2.csv																																		domain	65	Interests and Hobbies Vertical	Top level interests and hobbies groupings, like Food or Travel
jsonBE2.csv																																		entity	8.25048e+17	Food	Food
jsonBE2.csv																																		domain	35	Politician	Politicians in the world, like Joe Biden	26	34	pcanfin	135430876	174	183	securite
jsonBE2.csv																																		entity	1.2207e+18	COVID-19		108	116	pcanfin	135430876	263	274	Nutriscore
jsonBE2.csv																																										327	346	europethatprotects
jsonBE2.csv																																										259	272	EUCancerPlan
jsonBE2.csv																																		entity	1.12787e+18	European Parliament	European Parliament					69	81	madeinItaly
jsonBE2.csv																																										273	278	Aepi
jsonBE2.csv																																		entity	7.81975e+17	Transportation						12	20	Ryanair
jsonBE2.csv																																		domain	46	Brand Category	Categories within Brand Verticals that narrow down the scope of Brands					21	32	ThomasCook
jsonBE2.csv																																		entity	7.81975e+17	Airline						33	52	StopFraisBancaires
jsonBE2.csv																																		domain	47	Brand	Brands and Companies					53	65	TropViteUsé
jsonBE2.csv																																		entity	8.65147e+17	Ryanair	Ryanair					66	75	IndiceTA
jsonBE2.csv																																		domain	65	Interests and Hobbies Vertical	Top level interests and hobbies groupings, like Food or Travel					159	178	ConsumerProtection
jsonBE2.csv																																		entity	8.3916e+17	Travel	Travel
jsonBE2.csv																																		domain	66	Interests and Hobbies Category	A grouping of interests and hobbies entities, like Novelty Food or Destinations
jsonBE2.csv																																		domain	67	Interests and Hobbies	Interests, opinions, and behaviors of individuals, groups, or cultures; like Speciality Cooking or Theme Parks
jsonBE2.csv																																		entity	8.49076e+17	Air travel	Air travel
jsonBE2.csv																																		domain	47	Brand	Brands and Companies	172	187	AceitesOlivaES	2353479331
jsonBE2.csv																																		entity	10026299835	Coca-Cola
jsonBE2.csv																																		domain	66	Interests and Hobbies Category	A grouping of interests and hobbies entities, like Novelty Food or Destinations
jsonBE2.csv																																		domain	46	Brand Category	Categories within Brand Verticals that narrow down the scope of Brands
jsonBE2.csv																																		entity	7.81975e+17	Beverage
jsonBE2.csv																																										176	188	AgriOutlook
jsonBE2.csv																																						185	197	SugarEurope	4330529897
jsonBE2.csv																																										150	164	Pronutriscore
jsonBE2.csv																																						43	56	leedsbeckett	20505035	121	129	testing
jsonBE2.csv																																										204	220	AntiDopingForum
jsonBE2.csv																																										221	234	LetsBEACTIVE
jsonBE2.csv																																										15	26	Nutriscore
jsonBE2.csv																								116	139	https://t.co/hMtGAknkrC	https://twitter.com/MrConso/status/1192583954517417995/photo/1	pic.twitter.com/hMtGAknkrC
jsonBE2.csv																								281	304	https://t.co/8Jz2YXLBwJ	https://twitter.com/euroecolos/status/1192438902939901952/photo/1	pic.twitter.com/8Jz2YXLBwJ
jsonBE2.csv																																		entity	7.81975e+17	CPG		85	93	VladaRH	444097675	264	272	obesity
jsonBE2.csv																																		entity	10024011447	Nestle
jsonBE2.csv																																		domain	48	Product	Products created by Brands. Examples: Ford Explorer, Apple iPhone.
jsonBE2.csv																																		entity	10046158484	Nestle USA
jsonBE2.csv																																		entity	7.81975e+17	Services
jsonBE2.csv																																		domain	47	Brand	Brands and Companies
jsonBE2.csv																																		entity	10045225402	Twitter
jsonBE2.csv																																						239	248	MAC_MEPs	1288273092	123	132	vaccines
jsonBE2.csv																																						249	264	EP_Environment	951333319	171	182	Nutriscore
jsonBE2.csv																																										215	222	Cancer
jsonBE2.csv																																		domain	35	Politician	Politicians in the world, like Joe Biden	21	32	Agrinsieme	8.39113e+17
jsonBE2.csv																																		entity	8.27123e+17	Matteo Salvini	Matteo Salvini	33	44	coldiretti	626360641
jsonBE2.csv																																		domain	45	Brand Vertical	Top level entities that describe a Brands industry	45	61	Confagricoltura	401581073
jsonBE2.csv																																		entity	7.81975e+17	CPG		62	78	Cia_Agricoltura	890938518
jsonBE2.csv																																		domain	47	Brand	Brands and Companies	79	95	matteosalvinimi	270839361
jsonBE2.csv																																		entity	10042561064	Mondelez International		200	210	HercbergS	2333109386
jsonBE2.csv																																		domain	65	Interests and Hobbies Vertical	Top level interests and hobbies groupings, like Food or Travel
jsonBE2.csv																																		entity	8.25048e+17	Food	Food
jsonBE2.csv																																		entity	8.47869e+17	Home & family	Hobbies and interests
jsonBE2.csv																																										90	101	nutriscore
jsonBE2.csv																																		domain	47	Brand	Brands and Companies	121	135	fondationLFDA	7.47754e+17
jsonBE2.csv																																		entity	9.47037e+17	Groupe Casino	Groupe Casino
jsonBE2.csv																																		domain	47	Brand	Brands and Companies
jsonBE2.csv																								213	236	https://t.co/cFHSzHaItq	https://twitter.com/HercbergS/status/1141728028675969028	twitter.com/HercbergS/stat…	55	60	0.9945	Place	Europe
jsonBE2.csv																																		entity	9.18539e+17	Physical Wellness	Physical Wellness
jsonBE2.csv																																		domain	67	Interests and Hobbies	Interests, opinions, and behaviors of individuals, groups, or cultures; like Speciality Cooking or Theme Parks
jsonBE2.csv																																		entity	8.57879e+17	Marketing	Marketing					174	188	WithOrWithout
jsonBE2.csv		3Ti		3ti.biz									BE	België	Feature	4.35771	50.8434	4.41251	50.8816	city	a27b892134b15b1e	Schaarbeek	Schaarbeek, België						270	276	0.9483	Place	Croatia	entity	8.47869e+17	Home & family	Hobbies and interests					90	102	Agriculture
jsonBE2.csv		Aceites Oliva España	Inicia una experiencia como nunca antes has vivido. Embárcate en un viaje hacia la esencia del oro líquido con la Interprofesional del Aceite de Oliva Español.																															domain	46	Brand Category	Categories within Brand Verticals that narrow down the scope of Brands	21	33	anne_bucher	519763441	85	95	consumers
jsonBE2.csv		Agrinsieme	Agrinsieme è il coordinamento che rappresenta le aziende e le cooperative di @Cia_Agricoltura, @Confagricoltura, @Copagri e @CooperativeAgro.	Italia																														domain	47	Brand	Brands and Companies
jsonBE2.csv		Biljana Borzan	Zastupnica 🇭🇷 @Europarl_EN, liječnica, potpredsjednica @TheProgressives, potpredsjednica @SDPHrvatske, antifašistkinja - Moj posao je da EU radi za ljude!	Osijek, Croatia																																						250	257	Health
jsonBE2.csv		Bram Bombeek	boernalist @vilt_nieuws / picks up chicks professionally / Klimaatheld van de gemeente Denderleeuw / I AM judging you	Gent																																						247	261	gezondereflex
jsonBE2.csv		C.I.B.E.	CIBE represents & defends the interests of EU #SugarBeetGrowers within the European Institutions & international organisations on fundamental issues since 1927	Brussels																														domain	45	Brand Vertical	Top level entities that describe a Brands industry
jsonBE2.csv		Camille Perrin	Senior Food Policy Officer @beuc 🍎 Mostly (but not only!) about #food & #agriculture. 🇫🇷 in 🇧🇪. Views personal, RT = interesting (she/her)	Brussels																														entity	8.3916e+17	General Travel	General Travel
jsonBE2.csv		Cia-Agricoltori Italiani	Con oltre 900.000 iscritti, è una delle maggiori organizzazioni agricole europee. Presente in modo capillare sull’intero territorio nazionale.	Roma, Lazio																																						106	120	evidencebased
jsonBE2.csv		Coca-Cola	Real Magic is only a sip away.	Atlanta, GA																														entity	7.81975e+17	CPG		12	20	Food_EU	2874880006	70	84	mediterranean
jsonBE2.csv		Confagricoltura	Confagricoltura è l’organizzazione di rappresentanza e di tutela dell’impresa agricola. È presente in modo capillare su tutto il territorio nazionale	Italia																																						83	93	retailers
jsonBE2.csv		Croatia in the EU	Official account of the Permanent Representation of Croatia to the European Union 🇭🇷🇪🇺 / Stalno predstavništvo Republike Hrvatske pri Europskoj uniji	Brussels, Belgium									BE	België	Feature	4.39999	50.8338	4.4629	50.8631	city	6a1de1c2441194ef	Sint-Lambrechts-Woluwe	Sint-Lambrechts-Woluwe, België																			225	229	FIC
jsonBE2.csv		Delhaize	Now at your service: @DelhaizeFR & @DelhaizeNL	Brussels																				281	304	https://t.co/8Jz2YXLBwJ	https://twitter.com/euroecolos/status/1192438902939901952/photo/1	pic.twitter.com/8Jz2YXLBwJ
jsonBE2.csv		Eleonora Varntoumian	Policy @cancernurseEU 🇪🇺 Etterbeek Advisory Council @healthparl Committee @EPHA_EU Food Systems & NCD Prevention WG member 🐤 health, equality & human rights.	Brussels, Belgium																																						314	326	Coronavirus
jsonBE2.csv		Emma Calvert	Senior Food Policy Officer, European Consumer Organisation (@BEUC) Working on reformulation, marketing to kids and food labelling. (On mat leave)	Brussels, Belgium																														entity	10024011447	Nestle
jsonBE2.csv		ENVI Committee Press	European Parliament Committee on Environment, Public Health and Food Safety. Managed by Thomas Haahr & Dana Popp. RTs ≠ endorsement.	Brussels/Strasbourg																																						250	257	Health
jsonBE2.csv		ESSEC Grande conso	Compte officiel de la chaire Grande Consommation @essec Suivez nous aussi sur Instagram, Facebook et Linked In\n\n#Industrie #Commerce #Consommation	Cergy, France																														entity	7.81975e+17	Grocery/Convenience		111	120	OABA_Off	1908832087
jsonBE2.csv		EU Sugar Manufacturers	Official account of the European Association of Sugar Manufacturers (CEFS). Partners of https://t.co/VqpdwcF6tJ and https://t.co/KZWRbTGclF. RT = RT.																															entity	7.81975e+17	CPG
jsonBE2.csv		Fabio Massimo Castaldo	🇮🇹🇪🇺 Vice President of the European Parliament #M5S Cambieremo il nostro Paese per non cambiare Paese! ⭐️⭐️⭐️⭐️⭐️	Roma, Lazio																																						259	272	EUCancerPlan
jsonBE2.csv		FondationDroitAnimal	La Fondation Droit Animal, Ethique et Sciences (LFDA) a pour but de faire évoluer le droit en faveur des animaux à l'aide d'arguments éthiques et scientifiques	Paris, France																														domain	46	Brand Category	Categories within Brand Verticals that narrow down the scope of Brands	100	110	CIWF_Agro	9.48219e+17
jsonBE2.csv		Francesco Tramontin	Virtuous Lobbyist and Evil Rocker. Group Public Policy at Ferrero. The views expressed are mine unless you convince me otherwise	Brussel, België																																		200	216	NathalieLoiseau	21694393	275	286	prevention
jsonBE2.csv		Gian Marco Centinaio	Senatore della LEGA Tifoso del parma, appassionato di Harley #100x100centinaio	pavia																														entity	7.81975e+17	Candy/Gum
jsonBE2.csv		Graeme Taylor	Proud father, husband, #runner, #triathlete, food & wine lover, caffeine addict, Masterchef also-ran & head of public affairs @syngenta	Basel, Switzerland																														entity	9.20389e+17	Cardio	Cardio
jsonBE2.csv		Herbalife Nutrition EU	EU account of @Herbalife.\nWe advocate for EU policies which encourage and inspire Europeans to embrace a healthier, more active lifestyle.\n#HerbalifeNutrition	Location: Brussels, Belgium																														entity	8.34828e+17	Drinks	Drinks
jsonBE2.csv		Hercberg Serge	Professeur de Nutrition, Faculté Médecine Université Sorbonne Paris Nord (ex Paris 13)\nEquipe de Recherche en Epidémiologie Nutritionnelle Inserm/Inra/Cnam/UP13	Paris, France																				162	185	https://t.co/P2QW6DBYaM	https://twitter.com/MrConso/status/1192397109112254464/photo/1	pic.twitter.com/P2QW6DBYaM
jsonBE2.csv		Ivo Mechels	Consumer Champion | CEO @Euroconsumers | Executive Director @Testaankoop / @Test_Achats | Treasurer @Consumers_Int | Chairman ICRT | Board Member @Beuc	Brussels																																						185	198	sportspeople
jsonBE2.csv		Jean-Philippe Ducart	Head Public Affairs & Media Relations Spokesman Porte-parole-Woordvoerder @Test_Achats @TestAankoop #Nutriscore #TropViteUsé #StopAbusCorona #StopFraisBancaires	Belgium																																		102	116	SKyriakidesEU	2476130260	265	277	EUGreenDeal
jsonBE2.csv		Joeri Staessen	Directeur Netwerk en Sales & Business Development @Partena. Sociaal engagement. Ondernemend. Lerend. Gent. Twitter in eigen naam.	iPhone: 51.066919,3.639042																				281	304	https://t.co/8Jz2YXLBwJ	https://twitter.com/euroecolos/status/1192438902939901952/photo/1	pic.twitter.com/8Jz2YXLBwJ
jsonBE2.csv		Julie Frère	Porte-parole de @Test_Achats - https://t.co/5FICSn2gj3 Public Affairs & Media Relations	Brussels																																						215	227	EUFarm2Fork
jsonBE2.csv		Le Monde	L'actualité de référence par la rédaction du Monde | Piloté par @charlotteherzog @gregorbrandy & @PBerhouet	Paris																														domain	66	Interests and Hobbies Category	A grouping of interests and hobbies entities, like Novelty Food or Destinations	260	276	JulieTestAchats	2331648078
jsonBE2.csv		Maggie De Block	Fractieleider Open Vld Kamer. \n\nIk woon in het mooie Merchtem. Ik ben getrouwd met Luc en ben de mama van Julie en Jan. Trotse oma van John.	Brussel, België									BE	België	Feature	4.31223	50.7637	4.41333	50.8169	city	c866291b5c89aa7a	Ukkel	Ukkel, België																			209	219	labelling
jsonBE2.csv		Matteo Salvini	Leader della Lega #primagliitaliani 🇮🇹																																							235	246	gezondeten
jsonBE2.csv		Maximo Torero	Chief Economist of the Food and Agriculture Organization of the United Nations - FAO	Rome, Italy																														domain	67	Interests and Hobbies	Interests, opinions, and behaviors of individuals, groups, or cultures; like Speciality Cooking or Theme Parks
jsonBE2.csv		MEPs Against Cancer	All-party group of MEPs Against Cancer in the European Parliament. Account managed by MAC Secretariat @cancerleagues	Brussels																														domain	46	Brand Category	Categories within Brand Verticals that narrow down the scope of Brands
jsonBE2.csv		Nathalie Guillaume	General Secretary, Corporate Affairs & Sustainability Director @Danone BeLux. Passionate for regenerating our planet. Fan of co-creation & dialogue. Optimistic.	Brussels									BE	België	Feature	3.57976	50.9795	3.84936	51.188	city	67687709552688fe	Gent	Gent, België																			195	214	nutritionlabelling
jsonBE2.csv		Nathalie Loiseau	Députée européenne. Présidente de la sous-commission Sécurité et Défense. Ancienne ministre chargée des Affaires européennes	France																														entity	1.11811e+18	Nathalie Loiseau		35	51	NathalieLoiseau	21694393	228	237	securite
jsonBE2.csv		Neil Cuthbert	Founder/Director @PACooperative, @CIPR_PA committee member, #Munroist🏔 6590, #Scotland and #UnitedKingdom 🇬🇧 #politics, #history, #WW1, #Outdoors, #EV⚡️🚗	Edinburgh, Scotland																														entity	8.27123e+17	Matteo Salvini	Matteo Salvini	11	20	giamma71	101573147
jsonBE2.csv		Nestlé	Unlocking the power of food to enhance quality of life for everyone, today and for generations to come.	Vevey, Switzerland																														entity	7.81975e+17	CPG		158	163	beuc	237222584
jsonBE2.csv		Nestlé Europe	News and information from the Nestlé Corporate Communications and ESG Engagement team for EMENA. Tweets by Karel & Paolo	Brussels																														domain	65	Interests and Hobbies Vertical	Top level interests and hobbies groupings, like Food or Travel
jsonBE2.csv		Netherlands at the EU	Official Twitter account of the Permanent Representation of the Netherlands to the EU. Follow us on https://t.co/rI2qFnQ7tl	Brussel, België									BE	België	Feature	4.34734	50.8007	4.40339	50.8406	city	3060d31f8bf75f53	Elsene	Elsene, België																			243	257	HealthyLiving
jsonBE2.csv		OABA	Œuvre d'Assistance aux Bêtes d'Abattoirs. \nAssociation de protection des animaux de ferme, de l'élevage à l'abattoir, reconnue d'utilité publique depuis 1965.	France																														entity	7.81975e+17	Retail		77	90	cQuiLePatron	1032246972
jsonBE2.csv		Olivera Međugorac	In love with #communication, #politics & #art. EU Affairs Manager @Nestlé	Brussels, Belgium																														entity	7.81975e+17	Beverage		126	135	CocaCola	26787673	162	171	OliveOil
jsonBE2.csv		Pam Crossland - Pandemic ISN'T over ⚧ 🧜‍♀️ 🧜‍♂️	Supporter of Independent North. Ex Labour.	North Manchester, UK									BE	België	Feature	3.58659	51.0744	3.66669	51.1389	city	236afcf5f0f6f879	Lovendegem	Lovendegem, België	158	181	https://t.co/hHe5uViVhX	https://twitter.com/SimonasSatunas/status/1334931323996286984/photo/1	pic.twitter.com/hHe5uViVhX						entity	8.47869e+17	Home & family	Hobbies and interests	150	157	eu2020	66762175	45	57	Sinterklaas
jsonBE2.csv		Pascal Canfin	Président de la commission Environnement du Parlement européen / Chair of the Environment committee of the European Parliament. #Renew #Renaissance	Paris																														entity	1.11811e+18	Nathalie Loiseau		10	25	Renaissance_UE	1.09027e+18	152	158	sante
jsonBE2.csv		Pierre Karleskind	Président de la Commission PECH du Parlement européen, Député européen @RenewEurope, Ex-conseiller régional @regionbretagne, Océanographe, PhD 🇪🇺🐟	Brest																														domain	123	Ongoing News Story	Ongoing News Stories like 'Brexit'	52	62	Pierre_Ka	306778929	249	262	EUcancerplan
jsonBE2.csv		Renaissance	Délégation des députés européens @enmarchefr, @MoDem, @agir_officiel et @PartiRadical au sein du groupe @RenewEurope.																															domain	47	Brand	Brands and Companies
jsonBE2.csv		Riché Matthieu	DIrecteur de la #RSE du @groupe_Casino	Ile-de-France, France																																						78	89	echtlekker
jsonBE2.csv		Sigrid Lauryssen		Aalst																														entity	9.03304e+17	Wellness and health	Wellness & Health	248	259	SLauryssen	483030524	75	86	Nutriscore
jsonBE2.csv		Stella Kyriakides	European Commissioner for Health and Food Safety. Human rights advocate. Focus on the positive.	Brussels, Belgium																																						287	298	Farmtofork
jsonBE2.csv		Tassos Haniotis	Director of Strategy, Simplification & Policy Analysis at the European Commission DG for Agriculture & Rural Development @EUAgri. Views expressed are personal.																															entity	8.34828e+17	Generic Drinks	Generic Drinks
jsonBE2.csv		The Consumer Voice	We represent 46 independent national consumer organisations in Brussels and defend the interests of European consumers.	Brussels, Belgium																														domain	46	Brand Category	Categories within Brand Verticals that narrow down the scope of Brands	164	178	UFCquechoisir	98651383
jsonBE2.csv		Thomas Hubbuch	Public Speaker, Investor, Consultant - helping CEOs convert from bosses to leaders #Unbossing	Brussels																														entity	8.50144e+17	Soda	Soda
jsonBE2.csv		UFC-Que Choisir	Ce compte n'est pas destiné à résoudre des litiges. Contactez l'association locale la plus proche de chez vous. https://t.co/rGlypUCnFX	Paris																														entity	7.81975e+17	Candy/Gum		179	191	Test_Achats	83814343
jsonBE2.csv		Vlada Republike Hrvatske	Vlada RH - službeni Twitter račun. Government of the Republic of Croatia - official Twitter account. Pravila korištenja: https://t.co/2hU2i6Xb7C	Croatia																				281	304	https://t.co/8Jz2YXLBwJ	https://twitter.com/euroecolos/status/1192438902939901952/photo/1	pic.twitter.com/8Jz2YXLBwJ
jsonBE3.csv					en		2215976798	Proud to be in the top 5 of @ATNIndex and leading the nutrition labeling ranking! This acknowledges the progress we’ve made to lead in well-being snacks and reaffirms our approach in how we communicate to consumers. #Impact4Growth #ATNI2018 https://t.co/xlTKNtX9lp https://t.co/upn1zqUAZb																127	150	https://t.co/nsYxqPfbMv	https://twitter.com/donkmat/status/1106213287979634689/photo/1	pic.twitter.com/nsYxqPfbMv
jsonBE3.csv		De Standaard	De officiële Twitter-account van De Standaard.	Brussels, Belgium	fr		3063744659	Les annonceurs pourront y déroger moyennant une contribution affectée à l'Agence nationale de santé publique. https://t.co/VzHVmUZBCn	quoted				BE	België	Feature	4.21808	51.1435	4.4983	51.3776	city	2a8a74486cd0d519	Antwerpen	Antwerpen, België											entity	10045225402	Twitter
jsonBE3.csv	2019-04-03 00:07:12	Comeos FR	Fédération belge du commerce et des services. Tweets in NL: @comeos_nl	1160 Auderghem	fr	und	8.69178e+17	Le Nutri-Score gagne une manche face à Nestlé, par Laurence Girard.\nhttps://t.co/1O4CyYJLwz		92308710	#Nutriscore Now... https://t.co/QXtqYfpptI													19	42	https://t.co/QXtqYfpptI	https://www.facebook.com/TestAankoop/videos/2924086727609124/	facebook.com/TestAankoop/vi…														0	11	Nutriscore					Twitter for Android
jsonBE3.csv	2019-05-01 16:56:55	Jean-Philippe Ducart	Head Public Affairs & Media Relations Spokesman Porte-parole-Woordvoerder @Test_Achats @TestAankoop #Nutriscore #TropViteUsé #StopAbusCorona #StopFraisBancaires	Belgium	fr	nl	2333109386	Le 8 mai 2019 la Commission Européenne enregistrera l'initiative citoyenne "ProNutriscore" visant à imposer #Nutriscore sur les produits alimentaires. Il faudra 1 million de signatures, dans au moins 7 États membres pour faire bouger la CE. A suivre ! https://t.co/mx7wBrBb71		92308710	@Test_Achats soutient ....@Testaankoop gaat voor.... @Test_Achats supports #Nutriscore https://t.co/HXCCNsDp45	quoted	BE	België	Feature	4.35771	50.8434	4.41251	50.8816	city	a27b892134b15b1e	Schaarbeek	Schaarbeek, België	90	113	https://t.co/HXCCNsDp45	https://twitter.com/HercbergS/status/1123601065050505216	twitter.com/HercbergS/stat…										0	12	Test_Achats	83814343	78	89	Nutriscore	83814343				Twitter for Android
jsonBE3.csv	2019-04-04 12:18:37	Vos	Ik ben die ben.Fier op Vlaanderen.	kust	fr	nl	295533890	Invitation de presse: demain 2 avril à 10h lancement de la campagne de ⁦@SanteBelgique⁩ «Nutri-Score» en collaboration avec ⁦@Test_Achats⁩ et ⁦@comeos_fr		9.44633e+17	DeBlock zit er weeral naast wat heeft die al goed gedaan, Twitter niet maar is wat slaperig\n👇👇\nWanneer diepvriesfrieten "gezonder" zijn dan zalm: is er iets mis met de nutriscore? https://t.co/ZAb6nuAE3a		BE	België	Feature	3.74703	50.8101	3.8668	50.9183	city	f65ac661cfdf3cd8	Zottegem	Zottegem, België	181	204	https://t.co/ZAb6nuAE3a	https://vrtnws.be/p.YjwPxq5bx	vrtnws.be/p.YjwPxq5bx						domain	46	Brand Category	Categories within Brand Verticals that narrow down the scope of Brands												Twitter for Android
jsonBE3.csv					und		9.00837e+17	@fevia_be @Maggie_DeBlock https://t.co/OC7QS8S2Ld	replied_to															127	150	https://t.co/nsYxqPfbMv	https://twitter.com/donkmat/status/1106213287979634689/photo/1	pic.twitter.com/nsYxqPfbMv														99	111	Transparenz
jsonBE3.csv		Test Aankoop	Non-profitorganisatie voor de verdediging van de rechten van de consument: Expert, Onafhankelijk, Dicht bij jou!	Sint-Gillis, België	nl		19037487	@Anarchazazel @destandaard Hij heeft wel humor. Al meer dan een jaar roepen testaankoop en recyclingnetwerk dat er een heel groot draagvlak is om #statiegeld in Vlaanderen in te voeren en wat is het eerste dat de burgemeester zegt in de krant: https://t.co/EAd4fHoXic	replied_to				BE	België	Feature	4.34734	50.8007	4.40339	50.8406	city	3060d31f8bf75f53	Elsene	Elsene, België											domain	47	Brand	Brands and Companies
jsonBE3.csv	2019-02-05 16:54:53	FEAP	FEAP is the Federation of European Aquaculture Producers, groups Fish Farming Associations & is the leading consultative body for European interests	Brussels, Belgium	en	en	2854745177	.@FoodDrinkEU welcomes the launch of EU discussion on front-of-pack #nutrition #labelling https://t.co/9pCZgeaKKd https://t.co/VRFkVmMTjG		848831221	Health, #nutrition and #wellbeing with @JBowman_Thirdi and @EASOobesity. How to make Food labelling really meaningful @NicolaCaputo @EP_Environment https://t.co/rBoVn8txp1													149	172	https://t.co/rBoVn8txp1	https://twitter.com/IDFEuropeBXL/status/1092813820807036930/photo/1	pic.twitter.com/rBoVn8txp1						domain	65	Interests and Hobbies Vertical	Top level interests and hobbies groupings, like Food or Travel	60	72	EASOobesity	1568301565	8	18	nutrition					Twitter for Android
jsonBE3.csv					fr		2333109386	#NutriScore: le vrai du faux: un reportage au JT 20h de @TF1 qui dénonce les fake news circulant sur les réseaux sociaux visant à discréditer Nutri-Score https://t.co/gZvSlPINki					BE	België	Feature	2.93617	51.1442	3.05824	51.2244	city	49ae4d8fc032ddd8	Oudenburg	Oudenburg, België															26	38	Testaankoop	81065538
jsonBE3.csv	2018-08-23 00:15:36					en				135221785	Thanks frédéric. Was looking for #NutriScore guidance NOT to follow. https://t.co/VwAVdKx8vA	quoted												69	92	https://t.co/VwAVdKx8vA	https://twitter.com/fleroy1974/status/1021778931387715584	twitter.com/fleroy1974/sta…														33	44	NutriScore					Twitter for iPhone
jsonBE3.csv	2018-11-20 10:27:52	Silvio Ferro MD	huisarts, MD, N=1, “It’s the insulin, Stupid!”, lift heavy, run far, mindfull living	Maasmechelen, België		en				349027336	Stephanie Bonnewyn from BEUC’s Belgian member Test Achats presenting in the @Europarl_EN on their work on the #NutriScore front-of-pack colour-coded nutritional labelling scheme and it’s importance for helping consumers make better choices in the supermarket https://t.co/N4tXKaKFCX													259	282	https://t.co/N4tXKaKFCX	https://twitter.com/EmmaCalvert3/status/1064812561391075328/photo/1	pic.twitter.com/N4tXKaKFCX	0	17	0.9727	Person	Stephanie Bonnewyn					76	88	Europarl_EN	36329597	110	121	NutriScore					Twitter for iPhone
jsonBE3.csv	2019-02-05 16:43:46	European Parliament	Follow for the latest information from the European Parliament. Account managed by the Parliament's web team. Privacy statement: https://t.co/pgMRBckG2S	Brussels/Strasbourg		en				848831221	Roundtable full of professionals ready to address the challenge EU nutrition legislation on carbohydrate quality. Should food labelling help self managing chronic diseases such as #diabetes? Now with MEP @NicolaCaputo and @IgnacioGaramen1 https://t.co/ks7wM8k2wV													240	263	https://t.co/ks7wM8k2wV	https://twitter.com/IDFEuropeBXL/status/1092811024514891778/photo/1	pic.twitter.com/ks7wM8k2wV										205	218	NicolaCaputo	83041759	181	190	diabetes					Twitter for Android
jsonBE3.csv	2018-07-22 20:14:24					fr				3063744659	L'équilibre alimentaire vu dans un distributeur de Bruxelles, aïe aïe aïe ☹️\n#NoteTonDistrib #Nutriscore #Nutrition #Alimentation #Belgique 🇧🇪\n(Faites de meilleur choix avec @OpenFoodFactsFr !) https://t.co/YpvmBPzr0A													194	217	https://t.co/YpvmBPzr0A	https://twitter.com/TaciteData/status/1021096135723823104/photo/1	pic.twitter.com/YpvmBPzr0A										174	190	OpenFoodFactsFr	584043179	77	92	NoteTonDistrib					Twitter Web Client
jsonBE3.csv	2018-05-26 11:27:40					en				32307080	Lead globally in nutrition labelling! https://t.co/ltl2hbHik3	quoted												38	61	https://t.co/ltl2hbHik3	https://twitter.com/mdlz/status/999354938894503936	twitter.com/mdlz/status/99…																					Twitter for iPhone
jsonBE3.csv	2018-04-23 15:12:48					und				2896189511	https://t.co/DdOnuTvr00													0	23	https://t.co/DdOnuTvr00	http://www.fooddrinkeurope.eu/news/statement/FoodDrinkEurope-welcomes-EU-discussion-on-FOP-nutrition-labelling	fooddrinkeurope.eu/news/statement…																					Twitter for Android
jsonBE3.csv	2018-11-28 15:54:29					en				3438879155	High level forum for a Better functioning food supply chain ongoing. Dual food quality, UTPs, origin labelling etc. within it's scope. https://t.co/sRYQRcweEZ													135	158	https://t.co/sRYQRcweEZ	https://twitter.com/RTaraskevicius/status/1067793860120711168/photo/1	pic.twitter.com/sRYQRcweEZ																					Twitter for Android
jsonBE3.csv	2019-02-23 11:28:36	Nicola Caputo	Assessore All’Agricoltura della Regione Campania	Italia		fr				92308710	GOOD NEWS #Nutriscore le processus est en route et va continuer en Belgique et en Europe ... @Test_Achats pionnier en Belgique soutient ! https://t.co/VE7gX0zzmH	quoted												138	161	https://t.co/VE7gX0zzmH	https://twitter.com/TaciteData/status/1098929817255317505	twitter.com/TaciteData/sta…										93	105	Test_Achats	83814343	10	21	Nutriscore					Twitter for Android
jsonBE3.csv	2019-03-14 16:19:34	Academy of European Law	Est. 1992. A leading provider of continuing training in #EULaw and partner of the legal professions at national level. #Conferences #Workshops #Livestreams	Trier, Germany		de				157357469	Gerade in einem Supermarkt in Brüssel... Während anderswo Bedenken getragen werden...\n\n#Nutriscore #Transparenz #Kundenservice https://t.co/nsYxqPfbMv													127	150	https://t.co/nsYxqPfbMv	https://twitter.com/donkmat/status/1106213287979634689/photo/1	pic.twitter.com/nsYxqPfbMv														87	98	Nutriscore					Twitter for Android
jsonBE3.csv	2018-05-05 11:34:45					en				32307080	Food giants to trial new nutrition labelling scheme in EU member states | Food Industry News | just-food https://t.co/y2JtB62ie5 via @just_food													105	128	https://t.co/y2JtB62ie5	https://www.just-food.com/news/food-giants-to-trial-new-nutrition-labelling-scheme-in-eu-member-states_id139188.aspx	just-food.com/news/food-gian…	55	56	0.5633	Organization	EU					133	143	just_food	29194271								Twitter for iPhone
jsonBE3.csv	2019-02-26 11:53:28	IDFEurope / Diabetes	IDF Europe is the leading voice for the growing number of people with #diabetes and those at risk in Europe. RT ≠ endorsement	Brussels		en				33870837	Discussion on front of pack labelling on food! #NutriScore #Nyckelhålet https://t.co/e0aytAW4ke													72	95	https://t.co/e0aytAW4ke	https://twitter.com/JensHenriksson/status/1100348114664415232/photo/1	pic.twitter.com/e0aytAW4ke														47	58	NutriScore					Twitter for iPhone
jsonBE3.csv	2018-06-04 15:54:10					ca				1100425861	Audiencia pública de la Comisión AGRI: "Labelling of origin for agricultural and food products" https://t.co/8lte9AWEKu													96	119	https://t.co/8lte9AWEKu	https://twitter.com/GOBCANTABRIABRU/status/1003636028484345856/photo/1	pic.twitter.com/8lte9AWEKu																					Twitter for Android
jsonBE3.csv	2018-04-20 17:38:09					en				32307080	An important milestone towards an EU approach to front of pack #nutrition #labelling. Let’s choose together an approach that works with consumers and doesn’t discriminate food categories. #singlemarket with a purpose https://t.co/TaKWE4kENO	quoted												218	241	https://t.co/TaKWE4kENO	https://twitter.com/dirkjacobseu/status/987027566124036096	twitter.com/dirkjacobseu/s…														64	74	nutrition					Twitter for iPhone
jsonBE3.csv	2018-04-16 15:11:41					en				57288936	A majority of #Dutch #consumers would like to see the #UK’s traffic light #labelling adopted in the #Netherlands, according to a new survey https://t.co/Y26kiLiNSS #Agribusiness #beverage #drinks #foods #nutrition													140	163	https://t.co/Y26kiLiNSS	https://www.foodnavigator.com/Article/2018/04/16/Dutch-consumers-support-UK-style-traffic-light-logo#.WtSgNHZiHiw.twitter	foodnavigator.com/Article/2018/0…														14	20	Dutch					Twitter for iPhone
jsonBE3.csv	2018-04-03 09:10:16					en				819084224	“Informed #ConsumerChoice and, particularly, better food #Labelling”, redefining the terms “healthy” and “natural”, the #FDA have some ambitious plans for the times ahead. Curious to see how FDA Commissioner Scott Gottlieb will fare! https://t.co/4DAZBzmAgh via @newfoodeconomy													234	257	https://t.co/4DAZBzmAgh	https://newfoodeconomy.org/fda-scott-gottlieb-natural-clean-labels-national-food-policy-conference/	newfoodeconomy.org/fda-scott-gott…	191	193	0.6462	Organization	FDA					262	277	newfoodeconomy	1.16749e+18	10	25	ConsumerChoice					Twitter for iPhone
jsonBE3.csv	2018-08-23 08:32:08					nl				182127605	@Maggie_DeBlock als er een stuk chocolade vóór je ligt, neem dan een klein stukje en niet de volledige lat! #nutriscore																											0	15	Maggie_DeBlock	2860510937	108	119	nutriscore	2860510937				Twitter for Android
jsonBE3.csv	2019-04-02 12:00:25	SPF Santé publique	Coronavirus: nous répondons à vos questions sur Twitter du lundi au vendredi entre 09h00 et 17h00.\n💻https://t.co/d8i3g3F4p0 | 📞0800/14.689 (semaine 9h-17h)	Bruxelles		nl				92308710	@hanscardyn @Anarchazazel @destandaard Vandaag steunen @comeos_fr en @Testaankoop campagne #Nutriscore samen ... Mss toch iets belangrijker en ... gezonder dan ruzie te hebben rond statiegeld. MvG.	replied_to																										0	11	hanscardyn	19037487	91	102	Nutriscore	19037487				Twitter for Android
jsonBE3.csv	2019-01-29 09:47:17	R.Taraškevičius	/ RT ≠ endorsement by definition // \nrt = MM&I // agri Brussels bubble stuff in the eye of the beholder /	Brussels, Belgium		en				346577568	.@feapinfo talking to Commissioner @V_Andriukaitis on importance of #aquaculture origin labelling, #caviar and #levelplayingfield in #food #law @Europarl_EN https://t.co/QRJJoh1rOy													157	180	https://t.co/QRJJoh1rOy	https://twitter.com/feapinfo/status/1090169498571812864/photo/1	pic.twitter.com/QRJJoh1rOy						domain	65	Interests and Hobbies Vertical	Top level interests and hobbies groupings, like Food or Travel	1	10	feapinfo	346577568	68	80	aquaculture					Twitter for iPhone
jsonBE3.csv	2018-12-21 17:58:21					en				92308710	#Xmas #2018 This Team is my Team This is Your Team We altogether with @Test_Achats @Testaankoop we made a very good job for consumers protection #Facebook #Dieselgate #TeRapKapot #TropViteUse #Ryanair #Nutriscore #DrugPrices Thx https://t.co/D50VzB7Bsm													229	252	https://t.co/D50VzB7Bsm	https://twitter.com/MrConso/status/1076159953625329664/photo/1	pic.twitter.com/D50VzB7Bsm						domain	119	Holiday	Holidays like Christmas or Halloween	70	82	Test_Achats	83814343	0	5	Xmas					Twitter for Android
jsonBE3.csv	2018-05-08 07:57:06					en				57288936	#NutriScore vs #EvolvedNutritionLabelEU: #France launched a campaign designed to raise awareness of its colorful new Nutri-Score #foodlabeling system https://t.co/pjLoUJuuTy #Agribusiness #consumers #Danone #Mars #Unilever #Mondelez #Nestle #CocaCola #PepsiCo #Kellogg #nutrition													150	173	https://t.co/pjLoUJuuTy	http://www.santepubliquefrance.fr/Accueil-Presse/Tous-les-communiques/Sante-publique-France-lance-la-premiere-campagne-nationale-pour-faire-connaitre-le-Nutri-Score-aupres-des-consommateurs	santepubliquefrance.fr/Accueil-Presse…	117	127	0.4059	Product	Nutri-Score	domain	45	Brand Vertical	Top level entities that describe a Brands industry					0	11	NutriScore					Twitter for iPad
jsonBE3.csv	2018-11-20 23:59:31	EURACTIV	Independent, multilingual, pan-European, & constructive. We build the European public sphere. Become a EURACTIV supporter: https://t.co/5QW6JPHpnN | #eaDebates	Brussels		fr				92308710	#Nutriscore pour tous ... https://t.co/PVOKEXkd9v	quoted												26	49	https://t.co/PVOKEXkd9v	https://twitter.com/sandrine_cabut/status/1064985592499503104	twitter.com/sandrine_cabut…						domain	45	Brand Vertical	Top level entities that describe a Brands industry					0	11	Nutriscore					Twitter for Android
jsonBE3.csv	2019-04-28 14:43:15					fr				92308710	#Nutriscore Pas de complot ... mais des lobbies mal intentionnés ... @Test_Achats soutient le #Nutriscore ! https://t.co/YZM7hbMMZh	quoted	BE	België	Feature	4.37317	50.8415	4.37317	50.8415	poi	07d9dd2761c81000	BEUC	BEUC	108	131	https://t.co/YZM7hbMMZh	https://twitter.com/HercbergS/status/1122354937306984448	twitter.com/HercbergS/stat…						domain	45	Brand Vertical	Top level entities that describe a Brands industry	69	81	Test_Achats	83814343	0	11	Nutriscore					Twitter for Android
jsonBE3.csv	2019-04-02 07:31:04					fr				92308710	#Nutriscore On y va ... https://t.co/Yw8Mds6b7I	quoted												24	47	https://t.co/Yw8Mds6b7I	https://twitter.com/SanteBelgique/status/1112655862617788417	twitter.com/SanteBelgique/…														0	11	Nutriscore					Twitter for Android
jsonBE3.csv	2018-08-23 20:09:48	The New Food Economy is now The Counter	Nonprofit newsroom investigating the forces shaping how and what America eats. Formerly known as The New Food Economy. Follow us @thecounter.	New York City		nl				7.97419e+17	#nutriscore ? Weer iets onvolledig en tegelijk ongeloofwaardig en nutteloos. Ofwel VERPLICHT je het, ofwel laat je het weg. #terzake																															0	11	nutriscore					Twitter for Android
jsonBE3.csv	2019-02-12 09:00:47	ENVI Committee Press	European Parliament Committee on Environment, Public Health and Food Safety. Managed by Thomas Haahr & Dana Popp. RTs ≠ endorsement.	Brussels/Strasbourg		en				222470247	#Foodlaw Annual Conference with a focus on Food Information to consumers. Brussels, 11-12April 2019. Our 2 day conference will cover EU legislative and policy update; transparency and sustainability of EU risk assessment; food labelling and marketing. https://t.co/IOHe47XJl1 https://t.co/KH4UheCzLe													252	275	https://t.co/IOHe47XJl1	http://era-comm.eu/go/foodlaw	era-comm.eu/go/foodlaw	74	81	0.7693	Place	Brussels									0	8	Foodlaw					Twitter Web Client
jsonBE3.csv	2018-10-01 22:34:32	OpenFoodFacts fr	Un projet collaboratif pour créer une base de données libre et ouverte sur les produits alimentaires.	Saint-Maur des Fossés, France		fr				92308710	#Food #Nutriscore 400 snacks reçoivent une cotation nutritionnelle grâce à @Test_Achats Ce mardi dans #CurieuxDuMatin sur la @lapremiere dès 6h15 https://t.co/yibTthY1Yi https://t.co/GshEQF9WYT													146	169	https://t.co/yibTthY1Yi	http://www.testachats.be/comparercollations	testachats.be/comparercollat…										75	87	Test_Achats	83814343	0	5	Food		Point	4.37881	50.8668319	Twitter for Android
jsonBE3.csv	2018-08-27 10:54:05					en				57288936	#Consumer group urges #Germany to stop opposing colour coded #NutritionLabelling... #EU is more and more fragmented in the #Food sector @EURACTIV https://t.co/ifZ6CDnZAZ #SingleMarket #Agribusiness #Beverages #Drink #Nutrition #NutriScore #PublicHealth													146	169	https://t.co/ifZ6CDnZAZ	https://www.euractiv.com/section/agriculture-food/news/consumer-group-urges-germany-to-stop-opposing-colour-coded-nutrition-labeling/	euractiv.com/section/agricu…										136	145	EURACTIV	14808226	0	9	Consumer					Twitter for iPad
jsonBE3.csv													BE	België	Feature	4.3543	50.8347	4.3543	50.8347	poi	07d9db4461887000	Proxy Delhaize	Proxy Delhaize															55	67	Test_Achats	83814343
jsonBE3.csv													BE	België	Feature	4.31399	50.7963	4.43695	50.9137	city	0653bb913c88c1ea	Brussel	Brussel, België											entity	7.81975e+17	Entertainment						94	105	Nutriscore
jsonBE3.csv													BE	België	Feature	4.37461	50.8392	4.37461	50.8392	poi	07d9ddeb0fc84002	European Parliament - Altiero Spinelli Building	European Parliament - Altiero Spinelli Building											domain	46	Brand Category	Categories within Brand Verticals that narrow down the scope of Brands
jsonBE3.csv																																						12	25	Anarchazazel	576565207
jsonBE3.csv																								127	150	https://t.co/nsYxqPfbMv	https://twitter.com/donkmat/status/1106213287979634689/photo/1	pic.twitter.com/nsYxqPfbMv														112	126	Kundenservice
jsonBE3.csv																																		domain	67	Interests and Hobbies	Interests, opinions, and behaviors of individuals, groups, or cultures; like Speciality Cooking or Theme Parks	133	148	EP_Environment	951333319
jsonBE3.csv																																		entity	9.17859e+17	Healthy Eating	Healthy Eating
jsonBE3.csv																								240	263	https://t.co/ks7wM8k2wV	https://twitter.com/IDFEuropeBXL/status/1092811024514891778/photo/1	pic.twitter.com/ks7wM8k2wV										223	239	IgnacioGaramen1	1.08626e+18
jsonBE3.csv																																		domain	30	Entities [Entity Service]	Entity Service top level domain, every item that is in Entity Service should be in this domain	144	156	Europarl_EN	36329597	111	129	levelplayingfield
jsonBE3.csv																																		entity	8.24777e+17	Generic Food	Generic Food					133	138	food
jsonBE3.csv																																		domain	30	Entities [Entity Service]	Entity Service top level domain, every item that is in Entity Service should be in this domain					139	143	law
jsonBE3.csv																																		entity	8.25066e+17	Seafood	Seafood
jsonBE3.csv																																		entity	1.04722e+18	Christmas 2018	Christmas 2018	83	95	Testaankoop	81065538	145	154	Facebook
jsonBE3.csv																																		domain	46	Brand Category	Categories within Brand Verticals that narrow down the scope of Brands					179	191	TropViteUse
jsonBE3.csv																																		entity	7.81975e+17	Airline						192	200	Ryanair
jsonBE3.csv																																		entity	7.81975e+17	Services						213	224	DrugPrices
jsonBE3.csv																																		domain	47	Brand	Brands and Companies
jsonBE3.csv																																		entity	10029202045	Facebook
jsonBE3.csv																																		domain	47	Brand	Brands and Companies
jsonBE3.csv																																		entity	8.65147e+17	Ryanair	Ryanair
jsonBE3.csv																																		entity	7.81975e+17	CPG
jsonBE3.csv																																		domain	47	Brand	Brands and Companies
jsonBE3.csv																																		entity	10024011447	Nestle
jsonBE3.csv																																		domain	48	Product	Products created by Brands. Examples: Ford Explorer, Apple iPhone.
jsonBE3.csv																								259	282	https://t.co/N4tXKaKFCX	https://twitter.com/EmmaCalvert3/status/1064812561391075328/photo/1	pic.twitter.com/N4tXKaKFCX
jsonBE3.csv																																										102	117	CurieuxDuMatin
jsonBE3.csv																																										123	128	Food
jsonBE3.csv																																										209	215	Drink
jsonBE3.csv																																										216	226	Nutrition
jsonBE3.csv																																										227	238	NutriScore
jsonBE3.csv																																										239	252	PublicHealth
jsonBE3.csv																																										124	132	terzake
jsonBE3.csv																																										93	104	Nutriscore
jsonBE3.csv																																										105	115	Nutrition
jsonBE3.csv																																										116	129	Alimentation
jsonBE3.csv																																										130	139	Belgique
jsonBE3.csv																																		entity	7.81975e+17	CPG						15	39	EvolvedNutritionLabelEU
jsonBE3.csv																																		domain	46	Brand Category	Categories within Brand Verticals that narrow down the scope of Brands					41	48	France
jsonBE3.csv																																		entity	7.81975e+17	Home						129	142	foodlabeling
jsonBE3.csv																																		domain	46	Brand Category	Categories within Brand Verticals that narrow down the scope of Brands					174	187	Agribusiness
jsonBE3.csv																																		entity	7.81975e+17	Beverage						188	198	consumers
jsonBE3.csv																																		domain	46	Brand Category	Categories within Brand Verticals that narrow down the scope of Brands					199	206	Danone
jsonBE3.csv																																		entity	7.81975e+17	Candy/Gum						207	212	Mars
jsonBE3.csv																																		domain	46	Brand Category	Categories within Brand Verticals that narrow down the scope of Brands					213	222	Unilever
jsonBE3.csv																																		entity	7.81975e+17	Beauty/Hygiene						223	232	Mondelez
jsonBE3.csv																																		domain	47	Brand	Brands and Companies					233	240	Nestle
jsonBE3.csv																																		entity	10024011447	Nestle						241	250	CocaCola
jsonBE3.csv																																		domain	47	Brand	Brands and Companies					251	259	PepsiCo
jsonBE3.csv																																		entity	10024138619	Unilever						260	268	Kellogg
jsonBE3.csv																																		domain	47	Brand	Brands and Companies					269	279	nutrition
jsonBE3.csv																																		entity	10026299835	Coca-Cola
jsonBE3.csv																																		domain	47	Brand	Brands and Companies
jsonBE3.csv																																		entity	10042561064	Mondelez International
jsonBE3.csv																																		domain	47	Brand	Brands and Companies
jsonBE3.csv																																		entity	10044058322	Mars
jsonBE3.csv																																		domain	47	Brand	Brands and Companies
jsonBE3.csv																																		entity	10044370067	Danone
jsonBE3.csv																																		domain	48	Product	Products created by Brands. Examples: Ford Explorer, Apple iPhone.
jsonBE3.csv																																		entity	10046158484	Nestle USA
jsonBE3.csv																																		domain	65	Interests and Hobbies Vertical	Top level interests and hobbies groupings, like Food or Travel
jsonBE3.csv																																		entity	8.25048e+17	Food	Food
jsonBE3.csv																																		domain	65	Interests and Hobbies Vertical	Top level interests and hobbies groupings, like Food or Travel
jsonBE3.csv																																		entity	8.34828e+17	Drinks	Drinks
jsonBE3.csv																																		domain	66	Interests and Hobbies Category	A grouping of interests and hobbies entities, like Novelty Food or Destinations
jsonBE3.csv																																		entity	8.34828e+17	Generic Drinks	Generic Drinks
jsonBE3.csv																																		domain	67	Interests and Hobbies	Interests, opinions, and behaviors of individuals, groups, or cultures; like Speciality Cooking or Theme Parks
jsonBE3.csv																																		entity	8.50144e+17	Soda	Soda
jsonBE3.csv																													74	91	0.5897	Organization	Food Industry News
jsonBE3.csv																																										75	85	labelling
jsonBE3.csv																																										189	202	singlemarket
jsonBE3.csv																																										21	31	consumers
jsonBE3.csv																																										54	57	UK
jsonBE3.csv																																										74	84	labelling
jsonBE3.csv																																										100	112	Netherlands
jsonBE3.csv																																										164	177	Agribusiness
jsonBE3.csv																																										178	187	beverage
jsonBE3.csv																																										188	195	drinks
jsonBE3.csv																																										196	202	foods
jsonBE3.csv																																										203	213	nutrition
jsonBE3.csv																													208	221	0.9891	Person	Scott Gottlieb									57	67	Labelling
jsonBE3.csv																																										120	124	FDA
jsonBE3.csv		Azazel Ostendam Lophius piscatorius	Cogito ergo sum. Ingenieur elektriciteit. Datahamsteraar. Realist mét gevoel vr humor, logisch maar niet ideologisch. Vrije meningsuiting is het hoogste goed.	Costa Belgicá, Ostend									BE	België	Feature	4.37891	50.8224	4.41148	50.8447	city	8f54da0b876827dc	Etterbeek	Etterbeek, België											domain	47	Brand	Brands and Companies
jsonBE3.csv		B. V. 💛🖤 🦁	Er zijn enkel \n♀️♀️♀️ en ♂️♂️♂️\n\nen er is #LIEFDE❤❤\n\n♀️😘♂️\n♀️😘♀️\n♂️😘♂️\n\n\n#Draai de #subsidiekraan dicht.\n\n\n #VerkiezingenMei2024	Vanmechelen,vRumbeke,vZottegem																														entity	7.81975e+17	Candy/Gum
jsonBE3.csv		Camille Taper Schüller, PhD 🇪🇺😷💉	#iAmEuropean. PhD in Sociocultural Anthropology at @UIBS. Professor at @UIBS. PRO @IIEAbrussels. Board Member @AlumniEuropae. Views are my own.	Bruxelles, Belgique																																						198	208	Beverages
jsonBE3.csv		Dirk Jacobs	🇳🇱-Limburg 🇪🇺 in the Brussels bubble. Deputy Director General of @FoodDrinkEU. Tweets my own, RT may or may not be endorsement.	Brussels, Belgium																																						184	197	Agribusiness
jsonBE3.csv		EASO	The European Association for the Study of Obesity represents 36 nations working to address unhealthy excess weight across Europe.	Europe																																						59	71	Nyckelhålet
jsonBE3.csv		Emma Calvert	Senior Food Policy Officer, European Consumer Organisation (@BEUC) Working on reformulation, marketing to kids and food labelling. (On mat leave)	Brussels, Belgium																														domain	45	Brand Vertical	Top level entities that describe a Brands industry					155	166	Dieselgate
jsonBE3.csv		Francesco Tramontin	Virtuous Lobbyist and Evil Rocker. Group Public Policy at Ferrero. The views expressed are mine unless you convince me otherwise	Brussel, België																																						22	30	Germany
jsonBE3.csv		Frans Verstrepen	Geen politieke voorkeur. Brede culturele interesses. Boerenzoon. Gevoelig voor ons oorlogsverleden. Reis (nog steeds) graag. Hou van lekker tafelen.	Brugge - Belgium																														domain	46	Brand Category	Categories within Brand Verticals that narrow down the scope of Brands
jsonBE3.csv		Frédéric Leroy	Exploring foodscapes.\nAnimal source foods in ethical, sustainable & healthy diets.\n@aleph2020 - https://t.co/T0Wu2dkwO5\n\nTweets reflect my own views	Brussels, Belgium																				259	282	https://t.co/N4tXKaKFCX	https://twitter.com/EmmaCalvert3/status/1064812561391075328/photo/1	pic.twitter.com/N4tXKaKFCX
jsonBE3.csv		hans cardyn	Director of Communications Comeos\n\nComeos vertegenwoordigt Handel & Diensten in België										BE	België	Feature	5.59524	50.9105	5.7675	51.0124	city	ab91b1461b3f40b7	Maasmechelen	Maasmechelen, België											entity	7.81975e+17	Services
jsonBE3.csv		Hercberg Serge	Professeur de Nutrition, Faculté Médecine Université Sorbonne Paris Nord (ex Paris 13)\nEquipe de Recherche en Epidémiologie Nutritionnelle Inserm/Inra/Cnam/UP13	Paris, France									BE	België	Feature	3.13411	51.1582	3.31021	51.3633	city	8f4af0a2f7f81f49	Brugge	Brugge, België											entity	1.10806e+18	TF1	TF1
jsonBE3.csv		Ignacio Garamendi	ILSI Europe Executive Director,\nopinions are on my own	Bruselas, Bélgica																				276	299	https://t.co/KH4UheCzLe	https://twitter.com/ERATrier/status/1095231225600659456/photo/1	pic.twitter.com/KH4UheCzLe	133	134	0.5979	Organization	EU
jsonBE3.csv		Jens Henriksson	Lobbyist konsumentfrågor	Stockholm																																		55	65	comeos_fr	3131238437
jsonBE3.csv		just-food.com	The official twitter page of https://t.co/eg2JacXHgq - providing global food industry news and analysis.	London and Bromsgrove UK																																						84	87	EU
jsonBE3.csv		La Première	«L'esprit clair» ! Écoutez la radio en ligne : https://t.co/5WlchGDCAR Plus d'infos sur https://t.co/jTlpDMDMNG	Belgique																														entity	7.81975e+17	Transportation						167	178	TeRapKapot
jsonBE3.csv		Maggie De Block	Fractieleider Open Vld Kamer. \n\nIk woon in het mooie Merchtem. Ik ben getrouwd met Luc en ben de mama van Julie en Jan. Trotse oma van John.	Brussel, België																														entity	10046158484	Nestle USA
jsonBE3.csv		Matthias van der Donk	human beeing, husband, father of two / Interest in politics / views my own, RT not always endorsement	Rheinberg, Deutschland																																		26	38	destandaard	21408400
jsonBE3.csv		Mondelēz Intl	Official home for news about Mondelēz International and our iconic brands. We empower people to snack right around the world! DM for product questions.	Worldwide																																						61	80	NutritionLabelling
jsonBE3.csv		Oficina del Gobierno de Cantabria en Bruselas 🇪🇺	Acercando la Unión Europea a Cantabria y promocionando la región ante las instituciones desde 1998. #EuropeanUnion #EUPolicy #EUinmyRegion\nue@cantabria.be	Avenue des Arts 27, Bruxelles																				170	193	https://t.co/GshEQF9WYT	https://twitter.com/MrConso/status/1046860940497641472/photo/1	pic.twitter.com/GshEQF9WYT										125	136	lapremiere	706819416	6	17	Nutriscore
jsonBE3.csv		Sandrine Cabut	Journaliste #santé #médecine @lemonde_science \nChroniques #10000pasetplus #sportsante \nCoauteur à tps très partiel (https://t.co/0xV4K59pP6)	Paris, France																														entity	8.25048e+17	Food	Food	35	50	V_Andriukaitis	575269517	99	106	caviar
jsonBE3.csv		Simone Ceruti	Senior executive - Global Comms Head at Seda #packaging - #sustainability #digital #tech #consumers #innovation #socialbusiness - Here only MY opinions!	Milan																														domain	46	Brand Category	Categories within Brand Verticals that narrow down the scope of Brands					201	212	Nutriscore
jsonBE3.csv		Tacite	#OpenData & #Foodtech Enthusiast	Lille, France																																		69	81	Testaankoop	81065538
jsonBE3.csv		Test Achats	Association sans but lucratif pour la défense des droits des consommateurs: Expert, Indépendant, Proche de vous!	Brussels									BE	België	Feature	4.38273	50.8436	4.38273	50.8436	poi	07d9db3365c82001	European Commission - Berlaymont	European Commission - Berlaymont											entity	7.81975e+17	TV/Movies Related
jsonBE3.csv		Veerle Aertsen	Eurordis alumna, Eupati fellow. YOPD patient advocate. Mum. 2nd chance in life thanks 2 Medtronic and trying to make the most of it. Struggling to keep walking.	Antwerp, Belgium																																						170	183	SingleMarket
jsonBE3.csv		Vytenis Andriukaitis	Medical doctor, historian & humanist. Formally @EU_Commission's chief for Health and Food Safety. Forever a #health advocate now with @Who_Europe	Vilnius																														entity	9.03304e+17	Wellness and health	Wellness & Health	119	132	NicolaCaputo	83041759	23	33	wellbeing
jsonBE4.csv		Paolo De Castro	Eurodeputato del Partito Democratico - Coordinatore S&D Commissione agricoltura e sviluppo rurale del Parlamento europeo	Bologna, Emilia Romagna	en		23919945	What do some of the nutrition claims on food labels actually mean? @EUFIC gif explains. #ReadTheLabel #nutrition #food https://t.co/ks4LQ2xHP8	quoted																																	97	107	consumers
jsonBE4.csv	2018-03-09 12:15:44	🏴󠁧󠁢󠁳󠁣󠁴󠁿 Laird 8 Badge 🏴󠁧󠁢󠁳󠁣󠁴󠁿 💜🤍💚	#weWillNotComply #noVaccineMandates All Tweets do not represent anything or anybody, not even myself	Glasgow	en	en	23691974	UK govt publishing where it thinks powers should go after Brexit. Says it wants to hold on to 24 in devolved areas to protect UK market; including food labelling, food safety, animal health and chemical regulation. Says vast majority will go to Edinburgh.		79637502	Food labelling? That’ll be right https://t.co/cdWx7rht88	quoted	BE	België	Feature	4.6404	50.8241	4.77038	50.944	city	69ac35a51e92c734	Leuven	Leuven, België	33	56	https://t.co/cdWx7rht88	https://twitter.com/nickeardleybbc/status/972042785497993216	twitter.com/nickeardleybbc…																					Twitter for iPhone
jsonBE4.csv	2017-03-17 16:37:28				es	en	218962085	NutriScore, etiqueta alimentaria oficial para identificar los alimentos… https://t.co/yqEDTJx1PK @Gastronomiaycia @Gastronomiaycia https://t.co/N97mYzDDJ0		22653020	@FranPRoberts @FoodNavigator And the Nutriscore is also available worldwide using the @OpenFoodFacts android and iOS apps :-)	replied_to																	37	46	0.2873	Product	Nutriscore	domain	47	Brand	Brands and Companies	0	13	FranPRoberts	2872169027				2872169027				Twitter Web Client
jsonBE4.csv					es		3895788857	NutriScore, etiqueta alimentaria oficial para identificar los alimentos… https://t.co/czTdHB5ga5 #Noticias #Panama																					81	87	0.7747	Product	Android	entity	10026364281	Apple		96	112	OpenFoodFactsEs	615337193
jsonBE4.csv					es		277204624	NutriScore, etiqueta alimentaria oficial para identificar los alimentos saludables en Francia https://t.co/ZG8z1wmk6o @VisionChiapas https://t.co/vCN0xthYEg																										domain	48	Product	Products created by Brands. Examples: Ford Explorer, Apple iPhone.
jsonBE4.csv		Anthony Zacharzewski	Trying to make European democracy work. “Refreshingly free of the usual platitudes.” Founder of @demsoc. 🇵🇱🇬🇧🇪🇺	Bruxelles, Belgique	es		112570595	NutriScore, etiqueta alimentaria oficial para identificar los alimentos saludables en Francia https://t.co/yv5KrCC0Xg																										entity	10026820777	Android
jsonBE4.csv		Greenpeace EU	Breaking news & comment from the EU advocacy team on energy/climate change, agriculture/food, forests, trade, pollution, lobby transparency, democracy and more	Brussels (EU)	es		7.44504e+17	NutriScore, etiqueta alimentaria oficial para identificar los alimentos saludables en Francia https://t.co/Y8H1YhGZ56 #Albacete																										entity	10026820777	Android
jsonBE4.csv	2017-09-23 23:50:58				es	en	1649645323	NutriScore, etiqueta alimentaria oficial para identificar los alimentos saludables en Francia https://t.co/XePServIB5 #gastronomíaLewisEnT…		232135059	On gluten-free water &amp; other nuts food labelling: https://t.co/UHPgmcwLFj // @businessinsider #GlutenFree #FoodLabels @WellSpokenMark													54	77	https://t.co/UHPgmcwLFj	http://buff.ly/2wUKc81	buff.ly/2wUKc81										81	97	BusinessInsider	20562637	98	109	GlutenFree					Twitter for iPhone
jsonBE4.csv	2017-03-17 16:36:07	Daciana Sarbu	Former Romanian MEP (@TheProgressives), vice-chair of #ENVI / Membra a Parlamentului European (2007-2019), vicepresedinta - Comisia pt mediu & sănătate publică	Brussels/Bucharest	es	es	86102894	NutriScore, etiqueta alimentaria oficial para identificar los alimentos saludables en Francia https://t.co/tOFnuUJCMv		22653020	@Lewisentusalsa1 el #nutriscore ya está disponible en España utilizando los apps Android/iOS de @OpenFoodFactsEs	replied_to																	54	59	0.9883	Place	España	domain	47	Brand	Brands and Companies	0	16	Lewisentusalsa1	1649645323	20	31	nutriscore	1649645323				Twitter Web Client
jsonBE4.csv		Sugarwise	The certification authority for sugar claims🌟starring @GilesYeo🍐@DrJimPainter🏈@nicsnutrition📺 @RendPlato🚲🌹 https://t.co/dAJNusxvPV SugarwiseMe 💪🍴🥦	Cambridge, England	es		2259282504	NutriScore, etiqueta alimentaria oficial para identificar los alimentos saludables en Francia https://t.co/T8uvfM2o6A #castillayleón #arte…																										domain	48	Product	Products created by Brands. Examples: Ford Explorer, Apple iPhone.
jsonBE4.csv		Bernadette Callaghan	The health of the body and the mind is what keeps us going - I am a #nutrition and #health professional consultant | #lifestyle | #travel lover	Bournemouth, England	es		3304924313	NutriScore, etiqueta alimentaria oficial para identificar los alimentos saludables en Francia https://t.co/szNDDh0HSa																										domain	48	Product	Products created by Brands. Examples: Ford Explorer, Apple iPhone.
jsonBE4.csv					es		3120989068	NutriScore, etiqueta alimentaria oficial para identificar los alimentos saludables en Francia https://t.co/mxV8shLhBE @Gastronomiaycia https://t.co/3b0yJwHWlX																																		95	106	innovation
jsonBE4.csv					es		44128619	NutriScore, etiqueta alimentaria oficial para identificar los alimentos saludables en Francia https://t.co/mNGv86ew5s																														47	59	FoodDrinkEU	274611045	195	205	Labelling
jsonBE4.csv		WellSpoken	We work with wellness brands to ensure they provide consumers the highest level of credible, authentic, evidence-based info on fitness, nutrition & wellbeing	London, England	es		3123684970	NutriScore, etiqueta alimentaria oficial para identificar los alimentos saludables en Francia https://t.co/lsBRV8USFf #recetas																					104	106	0.9503	Product	iOS	domain	47	Brand	Brands and Companies
jsonBE4.csv					es		403015766	NutriScore, etiqueta alimentaria oficial para identificar los alimentos saludables en Francia https://t.co/jqoCpdkA0H https://t.co/N308dImBO5																														10	23	DacianaSarbu	849071016
jsonBE4.csv					es		4152116834	NutriScore, etiqueta alimentaria oficial para identificar los alimentos saludables en Francia https://t.co/az64K3XKuo https://t.co/GgUhRsUIT3																139	162	https://t.co/hPQWx83W1U	https://twitter.com/GreenpeaceEU/status/910806723635679232/photo/1	pic.twitter.com/hPQWx83W1U														63	67	GMO
jsonBE4.csv					es		8.28997e+17	NutriScore, etiqueta alimentaria oficial para identificar los alimentos saludables en Francia https://t.co/aUszYTqXpf https://t.co/3GZrhBODDI																														122	137	WellSpokenMark	8.84089e+17	110	121	FoodLabels
jsonBE4.csv					es		1475329230	NutriScore, etiqueta alimentaria oficial para identificar los alimentos saludables en Francia https://t.co/aUlS0vpARY																										entity	10026820777	Android
jsonBE4.csv	2017-04-11 10:17:11				es	en	1276250029	NutriScore, etiqueta alimentaria oficial para identificar los alimentos saludables en Francia https://t.co/9YZWSw0TZH		22653020	@pavelpoc @DacianaSarbu @OpenFoodFacts We also compute the Nutriscore, which was voted into law in France, in all countries. https://t.co/75e52ebFnp	replied_to												125	148	https://t.co/75e52ebFnp	https://twitter.com/Teolemon/status/851710706663796740/photo/1	pic.twitter.com/75e52ebFnp	99	104	0.9987	Place	France					0	9	pavelpoc	243097200				22653020				Twitter Web Client
jsonBE4.csv	2017-04-04 09:53:12	EURACTIV Agri & Food	EU Agrifood policy & news, by @EURACTIV's @gerardofortuna, @NatashaFoote & @GPeseckyt #eaAgriFood\n\n\nSign up for our weekly newsletter: https://t.co/O2QjTZ0OyU	Brussels, Belgium	es	en	7.76832e+17	NutriScore, etiqueta alimentaria oficial para identificar los alimentos saludables en Francia https://t.co/9HvNEnHaHj https://t.co/l5xTy3eQVj		15662428	Faith-based food labelling. How else will we know whether what we eat has transsubstantiated? https://t.co/osXws1u0dU	quoted												94	117	https://t.co/osXws1u0dU	https://twitter.com/thomasforth/status/849164091272962049	twitter.com/thomasforth/st…																					Twitter for iPhone
jsonBE4.csv	2017-05-11 18:52:01				es	en	2678235817	NutriScore, etiqueta alimentaria oficial para identificar los alimentos saludables en Francia https://t.co/8LfHRxT6oN		32307080	We all know what we do not like (nutriscore!) but will we agree on a European approach?#evolvednutritionlabeleu https://t.co/iZ1AGGY41b	quoted												112	135	https://t.co/iZ1AGGY41b	https://twitter.com/giovannilavia/status/862572258170200064	twitter.com/giovannilavia/…														87	111	evolvednutritionlabeleu					Twitter for iPhone
jsonBE4.csv					es		4887470757	NutriScore, etiqueta alimentaria oficial para identificar los alimentos saludables en Francia https://t.co/3vBi52xqwk https://t.co/50KVjiAm8s																					81	87	0.7747	Product	Android	entity	10026364281	Apple		96	112	OpenFoodFactsEs	615337193
jsonBE4.csv					es		7.99412e+17	NutriScore, etiqueta alimentaria oficial para identificar los alimentos saludables en Francia https://t.co/35BHChxvxC #Receta																										entity	10044903039	Apple - iOS
jsonBE4.csv		Food Standards Agency	Official Twitter feed from the Food Standards Agency (FSA). Keep up with the latest food safety tips, news and alerts. Also here to help Mon-Fri 9am-5pm	England, Wales, N. Ireland	es		552284372	NutriScore, etiqueta alimentaria oficial para identificar los alimentos saludables en Francia … https://t.co/kxiDGqJW87																																		130	135	food
jsonBE4.csv	2017-06-22 18:51:50	Foodlawlatest	News from the world of food and feed regulatory law by @CesareVarallo #foodlabeling #foodlaw #foodfraud #foodsafety	Turin, Italy	es	en	8.09424e+17	Nos parece muy bien lo de la etiqueta NutriScore. A ver si llega a España también https://t.co/ADAVWyLOpC vía @Gastronomiaycia		23919945	Part of a @EUFIC package on labelling - look out for more GIFs explaining the nutrition table &amp; health claims. #ReadTheLabel #healthclaims https://t.co/PJsZ646jsi	quoted												143	166	https://t.co/PJsZ646jsi	https://twitter.com/5tina/status/877930932795129856	twitter.com/5tina/status/8…										10	16	EUFIC	614411063	115	128	ReadTheLabel					Twitter for Android
jsonBE4.csv					it		384230182	No a sistemi di etichettatura contro prodotti mediterranei https://t.co/lA2GjfEbJP																																		97	110	Agribusiness
jsonBE4.csv		COPA-COGECA	Copa-Cogeca is the united voice of farmers and agri-cooperatives in the EU, representing 22 million farmers, pressing for a strong agriculture sector.#WeFarm4EU	Bruxelles	it		9234892	Le informazioni nutrizionali per i consumatori devono essere corrette e trasparenti, capaci di dare informazioni veritiere e complete e in alcun modo fuorvianti o condizionanti. \nNe parliamo domani all'incontro organizzato al Parlamento europeo. https://t.co/vad241wlQT					BE	België	Feature	4.37891	50.8224	4.41148	50.8447	city	8f54da0b876827dc	Etterbeek	Etterbeek, België																			6	16	labelling
jsonBE4.csv					es		2591540684	https://t.co/JOFZsGxqQQ NutriScore, etiqueta alimentaria oficial para identificar los alimentos saludables en Fran… https://t.co/x4yIEXN4VX																																		111	114	CX
jsonBE4.csv					ca		3521440156	Gastronomiaycia : NutriScore, etiqueta alimentaria oficial para identificar los alimentos … https://t.co/ySWPjPT43o) https://t.co/4dzSeVWrI1	quoted																													60	68	foodgov	68686173	206	217	MedicalLaw
jsonBE4.csv		Olivier Jordan	Scientific Watcher, Competitive Specialist & Information Analyst\r\nFocus on Food Industry, Nutrition, Public Health		es		1000567634	From my feed: NutriScore, etiqueta alimentaria oficial para identificar los alimentos saludables en Francia https://t.co/vYtNbLB9zI																					81	87	0.7747	Product	Android	entity	10026364281	Apple		96	112	OpenFoodFactsEs	615337193
jsonBE4.csv		Open Food Facts ES	Open Food Facts registra los productos alimenticios del mundo entero. Android - iPhone - Web		fr		1707141102	Etiquetage nutritionnel: et le gagnant est... Nutriscore de Serge Hercberg ! https://t.co/RWVv0Ehjwa																										domain	48	Product	Products created by Brands. Examples: Ford Explorer, Apple iPhone.
jsonBE4.csv		Pekka Pesonen	@COPACOGECA Secretary-General representing EU Farmers and Agri-cooperatives. Views are my own.\n#WeFarm4EU	Brussels, Belgium	en		20583748	EFFL 5/2017 is here! Among other topics, the new issue examines the relationship between #FoodLaw and #MedicalLaw https://t.co/7hYbXiJcvo https://t.co/FSFT8W1IqS					BE	België	Feature	3.57976	50.9795	3.84936	51.188	city	67687709552688fe	Gent	Gent, België																			32	39	health
jsonBE4.csv					fr		2854928463	Décidément sur tous les sujets on aura eu à faire à 1gouv socialiste amateur tjrs dans l'inutile, le cher &amp; le conflit d'intérêt #nutriscore https://t.co/tZAoogROq1																					79	85	0.7747	Product	Android	entity	10026364281	Apple
jsonBE4.csv					en		123933889	Can't wait to replace daft EU regs that food should be labelled with weight, allergies, etc....\r\rWe can replace it all with Easter regs.																																		111	116	food
jsonBE4.csv					es		886569128	Ahora en el blog ❯ NutriScore, etiqueta alimentaria oficial para identificar los alimentos… https://t.co/F5s1BykyHk vía @Gastronomiaycia https://t.co/zz9HQL3z8A																141	164	https://t.co/2Pkn56sXa9	https://twitter.com/dilam77/status/847452718125817856/photo/1	pic.twitter.com/2Pkn56sXa9														76	83	health
jsonBE4.csv					fr		2872169027	5-C NutriScore to be France's official nutrition label https://t.co/TFyCNBGKf0 via @FoodNavigator																														35	46	eaAgriFood	2219874457	185	194	AgriFood
jsonBE4.csv	2017-10-25 16:08:14	Francesco Tramontin	Virtuous Lobbyist and Evil Rocker. Group Public Policy at Ferrero. The views expressed are mine unless you convince me otherwise	Brussel, België	fr	en	137360176	5-C NutriScore to be France's official nutrition label https://t.co/ctdDkOANha via @FoodNavigator		20583748	@EUFoodLaw @Foodlawlatest @Food_EU @eaAgriFood @FoodDrinkEU @foodgov @ArtisanFoodLaw @GoodFoodLaw Read Leonie Evans' Editorial for free! https://t.co/LK58gSZWDa #FoodLaw #EFFL #FeedLaw #AgriFood #Labelling #MedicalLaw	replied_to												137	160	https://t.co/LK58gSZWDa	http://bit.ly/2zBQKIH	bit.ly/2zBQKIH	103	114	0.9805	Person	Leonie Evans					0	10	EUFoodLaw	193699495	161	169	FoodLaw	20583748				Twitter Web Client
jsonBE4.csv		𝐋𝐞𝐱𝐱𝐢𝐨𝐧.𝐞𝐮	𝐏𝐮𝐛𝐥𝐢𝐬𝐡𝐞𝐫 & 𝐄𝐯𝐞𝐧𝐭𝐬 #EULaw #StateAid #Procurement #Funds #Food #Climate #Chemical #Pharma #Tech | https://t.co/OW5ropp0MQ | 𝐋𝐢𝐧𝐤𝐞𝐝𝐈𝐧 https://t.co/HSWA5k6iNW	Berlin, Germany	fr		4889802142	5-C NutriScore to be France's official nutrition label https://t.co/3ONlxyxynr https://t.co/cH4Deu8eYY																														11	25	Foodlawlatest	1446318972	170	175	EFFL
jsonBE4.csv		FoodNavigator.com	http://t.co/gzPmJVbV6w is a daily news service that provides news stories and data of value to decision-makers in food and beverage development in Europe.	Montpellier - France	fr		538574076	5-C NutriScore to be France's official nutrition label @SamuelNutriChil @apaolocastro #nutrition #luisasolanonut\nhttps://t.co/c9ziLvCBxo																										domain	47	Brand	Brands and Companies
jsonBE4.csv					es		1061436655	→ ★ NutriScore, etiqueta alimentaria oficial para identificar los alimentos saludables en Francia https://t.co/jMkbe3SFuU #NewsNutricion ✔ https://t.co/SxpSxv3iKA																										entity	10044903039	Apple - iOS
jsonBE4.csv					en		22653020	@pavelpoc @DacianaSarbu @OpenFoodFacts We let Europeans scan &amp; take photos of food products using mobile apps: https://t.co/Ao3iTJ1F8Z and https://t.co/LXAzAVzwKh	replied_to																																	111	121	labelling
jsonBE4.csv		Fran Eatwell-Roberts	I like food, studied food but no longer work with food. Instead I do social research for the Scottish Government and nurture my exposed patch of woodland	Edinburgh, Scotland	fr		8.40185e+17	@HercbergS en mangeant que des produits A ou B on ne risque rien? #nutriscore #edulcorant																										domain	47	Brand	Brands and Companies
jsonBE4.csv	2017-03-17 16:35:47				en	es	23052639	@DGAIcoinfo @EUROCAREBRUSSEL Don’t follow. Not a new system, but bringing alc into existing system +if less complex than food, what problem?	replied_to	22653020	@VanelizCastro el #nutriscore ya está disponible en España utilizando los apps Android/iOS de @OpenFoodFactsEs	replied_to																	52	57	0.9883	Place	España	domain	47	Brand	Brands and Companies	94	110	OpenFoodFactsEs	615337193	18	29	nutriscore	4152116834				Twitter Web Client
jsonBE4.csv	2017-03-17 16:38:18	Artisan Food Law ®	A free legal resource for artisan and small scale food producers and all who are interested - https://t.co/NoAgDMRBHC. Opinions and rants provided by @pundles	Yorkshire, England	pt	en	7.61981e+17	#TAPAS #Gastro #Gourmet #Comer #Cocinar #Gastronomía #Food #Foodie NutriScore, etiqueta alimentaria oficial par... https://t.co/ThzhqaC8Hz		22653020	@Oli1964 @FoodNavigator And the Nutriscore is already available worldwide using the @OpenFoodFacts android and iOS apps :-)	replied_to																	32	41	0.2858	Organization	Nutriscore	domain	47	Brand	Brands and Companies	0	8	Oli1964	137360176				137360176				Twitter Web Client
jsonBE4.csv					pt		7.21392e+17	#Madrid #Gastro #Food #Foodie #Vino #Wine #tapas #Bar #Love #Comer #Eat NutriScore, etiqueta alimentaria ofici... https://t.co/LyD1gZa7Y3																					113	115	0.9492	Product	iOS	domain	47	Brand	Brands and Companies	86	100	OpenFoodFacts	583814681
jsonBE4.csv		Tom Forth	Head of Data @TheDataCity and Open Innovations || Runs @imactivate. No profile pic, location, name, and bio? I probably won't reply, or even see your tweet.	Leeds, Leeds, Leeds.	es		3496145795	#Gastronomia NutriScore, etiqueta alimentaria oficial para identificar los alimentos saludables en Francia https://t.co/2OjPgdd9uD																										domain	48	Product	Products created by Brands. Examples: Ford Explorer, Apple iPhone.
jsonBE4.csv	2017-11-29 16:33:18					en				57288936	Unleashing the power of free: How free-from can broaden its appeal https://t.co/OUbC8YHiZN #food #Agribusiness #labelling #nutrition													67	90	https://t.co/OUbC8YHiZN	https://www.foodnavigator.com/News/Market-Trends/Unleashing-the-power-of-free-How-free-from-can-broaden-its-appeal#.Wh7StJo_JT0.twitter	foodnavigator.com/News/Market-Tr…														91	96	food					Twitter for iPhone
jsonBE4.csv	2018-01-29 11:05:36					en				475624182	Our SG @pekka_pesonen intervening tomorrow in the debate on fair #food labelling "Informing without misleading" - Stay tuned! https://t.co/l42GYRBhCU	quoted	BE	België	Feature	4.31399	50.7963	4.43695	50.9137	city	0653bb913c88c1ea	Brussel	Brussel, België	126	149	https://t.co/l42GYRBhCU	https://twitter.com/paolodecastro/status/957916405487325184	twitter.com/paolodecastro/…										7	21	pekka_pesonen	3027874827	65	70	food					Twitter for Android
jsonBE4.csv	2017-03-09 11:47:08					en				224557686	Looking forward to @JunckerEU Commission report on alcohol labelling. Wine consumers finally having the same information as for other food. https://t.co/J7qXA2Dlet													140	163	https://t.co/J7qXA2Dlet	https://twitter.com/EUROCAREBRUSSEL/status/839789645550473216/photo/1	pic.twitter.com/J7qXA2Dlet										19	29	JunckerEU	169426475								Twitter Web Client
jsonBE4.csv	2017-03-15 15:36:24					fr				22653020	Le Nutriscore adopté par @minsocialsante : Décret d'application très bientôt &amp; scores déjà dispos sur @OpenFoodFacts\nhttps://t.co/3wPI8XoYiC https://t.co/E6r32ftbGq													121	144	https://t.co/3wPI8XoYiC	https://goo.gl/VGU4bP	goo.gl/VGU4bP										25	40	MinSocialSante	8.73183e+17								Twitter Web Client
jsonBE4.csv	2017-11-08 13:56:36					en				32307080	Italian food rules! But whoever thinks nutrition labels can be a threat to 'made in Italy' is wrong #labelling #food https://t.co/QHRy1Xc3Y7													117	140	https://t.co/QHRy1Xc3Y7	https://www.newsfood.com/filiera-italia-cordata-unita-imprese-autentiche-made-italy/	newsfood.com/filiera-italia…	84	88	0.9865	Place	Italy									100	110	labelling					Twitter for iPhone
jsonBE4.csv	2017-03-30 16:17:27					en				399985113	Innovative #food labelling concept: EU welcomes ‘traffic light food labels’ #health #nutrition #innovation #UX #CX | https://t.co/2FGzU1Rym3 https://t.co/2Pkn56sXa9													117	140	https://t.co/2FGzU1Rym3	https://goo.gl/sW5mE0	goo.gl/sW5mE0	36	37	0.6306	Organization	EU									11	16	food					Twitter Web Client
jsonBE4.csv	2017-03-25 14:45:08	FoodDrinkEurope	FoodDrinkEurope represents Europe's food & drink manufacturing industry, Europe's largest manufacturing sector in terms of turnover & employment. #FoodFuture	Brussels		en				57288936	France becomes one of the first countries in Region to recommend colour-coded nutrition #labelling system https://t.co/8ftBSxkQ1A #food													106	129	https://t.co/8ftBSxkQ1A	http://bit.ly/2nUpwbe	bit.ly/2nUpwbe	0	5	0.9837	Place	France									88	98	labelling					Twitter for iPhone
jsonBE4.csv	2017-09-06 17:46:13	European Food Law	We've moved! Follow our new handle \n@IHSMarkitAgri to keep up-to-date with valuable insights across the global agribusiness value chain.			en				3308109182	Former Head of Food Labelling at @DefraGovUK Steve Pugh discusses how we need more than the traffic light system on packaging #SugarSummit																		45	54	0.9891	Person	Steve Pugh					33	44	DefraGovUK	50069007	126	138	SugarSummit					Twitter for iPhone
jsonBE4.csv	2017-03-16 07:23:10					en				57288936	FoodDrinkEurope asks the Commission to conduct an assessment of the legality of national #labeling schemes https://t.co/kdub6QE4ro #Food													107	130	https://t.co/kdub6QE4ro	http://www.fooddrinkeurope.eu/news/statement/statement-on-french-nutriscore-proposal	fooddrinkeurope.eu/news/statement…	0	14	0.3729	Person	FoodDrinkEurope									89	98	labeling					Twitter for iPad
jsonBE4.csv	2017-03-17 16:01:17					es				22653020	@ViajerosGourmet Y el nutriscore ya está disponible en España utilizando los apps Android/iOS de @OpenFoodFactsEs	replied_to																	55	60	0.9887	Place	España	domain	47	Brand	Brands and Companies	0	16	ViajerosGourmet	3496145795				3496145795				Twitter Web Client
jsonBE4.csv	2017-03-17 16:04:21					es				22653020	@tapaspain Y el #nutriscore ya está disponible en España utilizando los apps Android/iOS de @OpenFoodFactsEs	replied_to																	50	55	0.9885	Place	España	domain	47	Brand	Brands and Companies	0	10	tapaspain	7.61981e+17	16	27	nutriscore	7.61981e+17				Twitter Web Client
jsonBE4.csv	2017-03-17 16:03:37					es				22653020	@tabernasmadrid Y el #nutriscore ya está disponible en España utilizando los apps Android/iOS de @OpenFoodFactsEs	replied_to																	55	60	0.9885	Place	España	domain	47	Brand	Brands and Companies	0	15	tabernasmadrid	7.21392e+17	21	32	nutriscore	7.21392e+17				Twitter Web Client
jsonBE4.csv	2017-03-17 16:35:16	Choppers	Ventas al Mayor y Detal de Especias, Frutos Secos,Semillas, Manicería. Correo: chopperventas@gmail.com Tlf. (0412) 201.34.55 Whatsapp: +584122013455	Caracas		es				22653020	@sweetvintage2 Y el #nutriscore ya está disponible en España utilizando los apps Android/iOS de @OpenFoodFactsEs	replied_to																	54	59	0.9885	Place	España	domain	47	Brand	Brands and Companies	0	14	sweetvintage2	2678235817	20	31	nutriscore	2678235817				Twitter Web Client
jsonBE4.csv	2017-03-17 16:00:24					es				22653020	@SolanoLuisa @SamuelNutriChil @apaolocastro Y el nutriscore ya está disponible en España utilizando los apps Android/iOS de @OpenFoodFactsEs	replied_to																	82	87	0.9891	Place	España	domain	47	Brand	Brands and Companies	0	12	SolanoLuisa	538574076				538574076				Twitter Web Client
jsonBE4.csv	2017-03-15 15:53:05					fr				22653020	@SelonMyself plutôt l'inverse ici: le NutriScore est passé malgré une volonté certaine de vouloir l'enterrer\nhttps://t.co/o8avToX4B2	replied_to												109	132	https://t.co/o8avToX4B2	http://www.lemonde.fr/planete/article/2017/03/15/feu-vert-du-ministere-de-la-sante-a-l-etiquetage-nutritionnel_5094915_3244.html	lemonde.fr/planete/articl…										0	12	SelonMyself	2854928463				2854928463				Twitter Web Client
jsonBE4.csv	2017-03-17 16:03:46					es				22653020	@recetasdecarol @Gastronomiaycia Y el #nutriscore ya está disponible en España utilizando los apps Android/iOS de @OpenFoodFactsEs	replied_to																	72	77	0.9889	Place	España	domain	47	Brand	Brands and Companies	0	15	recetasdecarol	218962085	38	49	nutriscore	218962085				Twitter Web Client
jsonBE4.csv	2017-03-17 16:34:13					es				22653020	@recetags Y el #nutriscore ya está disponible en España utilizando los apps Android/iOS de @OpenFoodFactsEs	replied_to																	49	54	0.9885	Place	España	domain	47	Brand	Brands and Companies	0	9	recetags	886569128	15	26	nutriscore	886569128				Twitter Web Client
jsonBE4.csv	2017-03-17 16:36:18					es				22653020	@PlaceresPaladar el #nutriscore ya está disponible en España utilizando los apps Android/iOS de @OpenFoodFactsEs	replied_to																	54	59	0.9883	Place	España	domain	47	Brand	Brands and Companies	0	16	PlaceresPaladar	3521440156	20	31	nutriscore	3521440156				Twitter Web Client
jsonBE4.csv	2017-03-17 16:03:20					es				22653020	@Para507pty Y el #nutriscore ya está disponible en España utilizando los apps Android/iOS de @OpenFoodFactsEs	replied_to																	51	56	0.9885	Place	España	domain	47	Brand	Brands and Companies	0	11	para507pty	1.44068e+18	17	28	nutriscore	3895788857				Twitter Web Client
jsonBE4.csv	2017-03-17 16:04:50					es				22653020	@NoticiasSev Y el #nutriscore ya está disponible en España utilizando los apps Android/iOS de @OpenFoodFactsEs	replied_to																	52	57	0.9885	Place	España	domain	47	Brand	Brands and Companies	0	12	NoticiasSev	7.33337e+17	18	29	nutriscore	7.33337e+17				Twitter Web Client
jsonBE4.csv	2017-03-17 16:03:59	Selon Myself ن matr. 41750 🇫🇷	Ils ne sont grands que parce que nous sommes à genoux. La Boétie	Lugdunum		es				22653020	@notialbacete Y el #nutriscore ya está disponible en España utilizando los apps Android/iOS de @OpenFoodFactsEs	replied_to																	53	58	0.9885	Place	España	domain	47	Brand	Brands and Companies	0	13	notialbacete	7.44504e+17	19	30	nutriscore	7.44504e+17				Twitter Web Client
jsonBE4.csv	2017-03-17 16:01:06					es				22653020	@NewsNutricion Y el nutriscore ya está disponible en España utilizando los apps Android/iOS de @OpenFoodFactsEs	replied_to																	53	58	0.9887	Place	España	domain	47	Brand	Brands and Companies	0	14	NewsNutricion	1061436655				1061436655				Twitter Web Client
jsonBE4.csv	2017-03-17 16:01:52					es				22653020	@MiguelSolanes_ Y el nutriscore ya está disponible en España utilizando los apps Android/iOS de @OpenFoodFactsEs	replied_to																	54	59	0.9887	Place	España	domain	47	Brand	Brands and Companies	0	15	MiguelSolanes_	4887470757				4887470757				Twitter Web Client
jsonBE4.csv	2017-03-17 16:35:31	Lewisentusalsa	Cheff y organizador de eventos con mucha ilusión y sobre todo con buen royo, también estoy en Facebook y sobre todo en YouTube, recetas diarias y restaurantes	madrid		es				22653020	@MealSolutionsES @Gastronomiaycia El #nutriscore ya está disponible en España utilizando los apps Android/iOS de @OpenFoodFactsEs	replied_to																	71	76	0.9889	Place	España	domain	47	Brand	Brands and Companies	0	16	MealSolutionsES	8.09424e+17	37	48	nutriscore	8.09424e+17				Twitter Web Client
jsonBE4.csv	2017-03-15 10:45:56					fr				22653020	@maghrebsante1 Et le Nutriscore est déjà dispo pour les pays du Maghreb dans @OpenFoodFacts. Si un produit n'y est pas, il suffit de le 📷	replied_to																										0	14	maghrebsante1	1707141102				1707141102				Twitter Web Client
jsonBE4.csv	2017-03-17 16:04:43					es				22653020	@LaVozDeCuenca Y el #nutriscore ya está disponible en España utilizando los apps Android/iOS de @OpenFoodFactsEs	replied_to																	54	59	0.9885	Place	España	domain	47	Brand	Brands and Companies	0	14	LaVozDeCuenca	7.44514e+17	20	31	nutriscore	7.44514e+17				Twitter Web Client
jsonBE4.csv	2017-03-17 16:04:31					es				22653020	@laCocinaVirtual Y el #nutriscore ya está disponible en España utilizando los apps Android/iOS de @OpenFoodFactsEs	replied_to																	56	61	0.9885	Place	España	domain	47	Brand	Brands and Companies	0	16	laCocinaVirtual	552284372	22	33	nutriscore	552284372				Twitter Web Client
jsonBE4.csv	2017-03-17 15:59:18					es				22653020	@KatuzarraAsador Y el #nutriscore ya está disponible en España utilizando los apps Android e iOS de @OpenFoodFactsEs :-)	replied_to																	56	61	0.9896	Place	España	domain	47	Brand	Brands and Companies	0	16	KatuzarraAsador	3304924313	22	33	nutriscore	3304924313				Twitter Web Client
jsonBE4.csv	2017-03-17 16:35:55	Dimitri Lambrecht	Shaking up organizations to revive in the new digital world | passionate curiosity for technology, customer experience & data | true believer of the #Metaverse	somewhere in the Lowlands		es				22653020	@JAValenciaMarin el #nutriscore ya está disponible en España utilizando los apps Android/iOS de @OpenFoodFactsEs	replied_to																	54	59	0.9883	Place	España	domain	47	Brand	Brands and Companies	0	16	JAValenciaMarin	8.28997e+17	20	31	nutriscore	8.28997e+17				Twitter Web Client
jsonBE4.csv	2017-03-15 18:08:59					en				224557686	@Jamesqnicholls @DGAIcoinfo exactly, all you have to do is align #alcohol labelling with that for other food products. https://t.co/sBTNYRFJY8	replied_to												119	142	https://t.co/sBTNYRFJY8	https://twitter.com/EUROCAREBRUSSEL/status/842060066412982273/photo/1	pic.twitter.com/sBTNYRFJY8														65	73	alcohol	23052639				Twitter Web Client
jsonBE4.csv	2017-03-17 16:34:24	Exquisitos CyL	Un maridaje de #Gastronomia #Cultura y #Turismo en #CastillayLeón			es				22653020	@GourmetFeed Y el #nutriscore ya está disponible en España utilizando los apps Android/iOS de @OpenFoodFactsEs	replied_to																	52	57	0.9885	Place	España	domain	47	Brand	Brands and Companies	0	12	GourmetFeed	7.76832e+17	18	29	nutriscore	7.76832e+17				Twitter Web Client
jsonBE4.csv	2017-03-17 16:04:07					es				22653020	@GastroScoop Y el #nutriscore ya está disponible en España utilizando los apps Android/iOS de @OpenFoodFactsEs	replied_to																	52	57	0.9885	Place	España	domain	47	Brand	Brands and Companies	0	12	GastroScoop	3123684970	18	29	nutriscore	3123684970				Twitter Web Client
jsonBE4.csv	2017-03-17 16:36:38	EUFIC	European Food Information Council. Food facts for healthy choices. For news from European research projects @SciFoodHealth	Europe		es				22653020	@Gastronomiaycia y el #nutriscore ya está disponible en España utilizando los apps Android/iOS de @OpenFoodFactsEs	replied_to																	56	61	0.9887	Place	España	domain	47	Brand	Brands and Companies	0	16	Gastronomiaycia	44128619	22	33	nutriscore	44128619				Twitter Web Client
jsonBE4.csv	2017-03-15 15:49:25					fr				22653020	@Franz_Hanoff @HercbergS Le NutriScore évalue la question nutritionnelle. Pour le reste, @OpenFoodFacts existe (additifs…)	replied_to																										0	13	Franz_Hanoff	8.40185e+17				8.40185e+17				Twitter Web Client
jsonBE4.csv	2017-03-17 15:08:43					es				22653020	@FogonVirtual ¡Puedes ver este #Nutriscore en productos españoles tambien! https://t.co/71GyMR2MEO (ios y android) @OpenFoodFactsEs	replied_to												75	98	https://t.co/71GyMR2MEO	https://es.openfoodfacts.org/descubrir	es.openfoodfacts.org/descubrir						domain	47	Brand	Brands and Companies	0	13	FogonVirtual	7.99412e+17	31	42	Nutriscore	7.99412e+17				Twitter Web Client
jsonBE4.csv	2017-03-17 16:03:53	France 2	Nos différences nous rassemblent. Bienvenue sur le compte officiel de #France2 !	Paris		es				22653020	@ExquisitosCyL Y el #nutriscore ya está disponible en España utilizando los apps Android/iOS de @OpenFoodFactsEs	replied_to																	54	59	0.9885	Place	España	domain	47	Brand	Brands and Companies	0	14	ExquisitosCyL	2259282504	20	31	nutriscore	2259282504				Twitter Web Client
jsonBE4.csv	2017-03-17 16:02:17					es				22653020	@dircasacalora Y el #nutriscore ya está disponible en España utilizando los apps Android/iOS de @OpenFoodFactsEs	replied_to																	54	59	0.9885	Place	España	domain	47	Brand	Brands and Companies	0	14	dircasacalora	86102894	20	31	nutriscore	86102894				Twitter Web Client
jsonBE4.csv	2017-03-17 16:01:27					es				22653020	@dgustoydisgusto Y el nutriscore ya está disponible en España utilizando los apps Android/iOS de @OpenFoodFactsEs	replied_to																	55	60	0.9887	Place	España	domain	47	Brand	Brands and Companies	0	16	dgustoydisgusto	112570595				112570595				Twitter Web Client
jsonBE4.csv	2017-03-17 16:33:56					es				22653020	@CosaFacildeCasa Y el #nutriscore ya está disponible en España utilizando los apps Android/iOS de @OpenFoodFactsEs	replied_to																	56	61	0.9885	Place	España	domain	47	Brand	Brands and Companies	0	16	CosaFacildeCasa	3120989068	22	33	nutriscore	3120989068				Twitter Web Client
jsonBE4.csv	2017-03-17 16:34:48	CocinaVirtual	Tu nuevo twitter de recetas Contacto: https://t.co/T8UKlfDI06			es				22653020	@CordobaGourmet Y el #nutriscore ya está disponible en España utilizando los apps Android/iOS de @OpenFoodFactsEs	replied_to																	55	60	0.9885	Place	España	domain	47	Brand	Brands and Companies	0	15	CordobaGourmet	403015766	21	32	nutriscore	403015766				Twitter Web Client
jsonBE4.csv	2017-03-17 16:35:00					es				22653020	@chopperventas Y el #nutriscore ya está disponible en España utilizando los apps Android/iOS de @OpenFoodFactsEs	replied_to																	54	59	0.9885	Place	España	domain	47	Brand	Brands and Companies	96	112	OpenFoodFactsEs	615337193	20	31	nutriscore	1276250029				Twitter Web Client
jsonBE4.csv	2017-03-17 16:02:41					es				22653020	@ChefMikeAbascal Y el #nutriscore ya está disponible en España utilizando los apps Android/iOS de @OpenFoodFactsEs	replied_to																	56	61	0.9885	Place	España	domain	47	Brand	Brands and Companies	0	16	ChefMikeAbascal	1475329230	22	33	nutriscore	1475329230				Twitter Web Client
jsonBE4.csv	2017-03-17 16:02:49					es				22653020	@CasaGuinart Y el #nutriscore ya está disponible en España utilizando los apps Android/iOS de @OpenFoodFactsEs	replied_to																	52	57	0.9885	Place	España	domain	47	Brand	Brands and Companies	0	12	CasaGuinart	983370950	18	29	nutriscore	983370950				Twitter Web Client
jsonBE4.csv	2017-03-17 16:00:38					es				22653020	@Cakesamedida Y el nutriscore ya está disponible en España utilizando los apps Android/iOS de @OpenFoodFactsEs	replied_to																	52	57	0.9887	Place	España	domain	47	Brand	Brands and Companies	0	13	Cakesamedida	1000567634				1000567634				Twitter Web Client
jsonBE4.csv	2017-03-17 16:38:05					en				22653020	@bernadetteocall And the Nutriscore is already available worldwide using the @OpenFoodFacts android and iOS apps :-)	replied_to																	25	34	0.2983	Organization	Nutriscore	domain	47	Brand	Brands and Companies	0	16	bernadetteocall	4889802142				4889802142				Twitter Web Client
jsonBE4.csv	2017-03-17 16:05:09	Aserch	Asociación de Empresarios Restauranteros de Chiapas, A. C. Comprometidos con el Desarrollo Económico, Turístico y Sustentable de Chiapas.	Chiapas, México.		es				22653020	@Auxihosteleria Y el #nutriscore ya está disponible en España utilizando los apps Android/iOS de @OpenFoodFactsEs	replied_to																	55	60	0.9885	Place	España	domain	47	Brand	Brands and Companies	0	15	Auxihosteleria	2591540684	21	32	nutriscore	2591540684				Twitter Web Client
jsonBE4.csv	2017-03-17 16:02:31					es				22653020	@ASERCH_A_C @VisionChiapas Y el #nutriscore ya está disponible en España utilizando los apps Android/iOS de @OpenFoodFactsEs	replied_to																	66	71	0.9889	Place	España	domain	47	Brand	Brands and Companies	0	11	ASERCH_A_C	277204624	32	43	nutriscore	277204624				Twitter Web Client
jsonBE4.csv	2017-03-17 16:34:37					es				22653020	@agullo_antonio Y el #nutriscore ya está disponible en España utilizando los apps Android/iOS de @OpenFoodFactsEs	replied_to																	55	60	0.9885	Place	España	domain	47	Brand	Brands and Companies	0	15	agullo_antonio	7.43426e+17	21	32	nutriscore	7.43426e+17				Twitter Web Client
jsonBE4.csv	2017-03-01 13:33:55					fr				22653020	. @France2tv @isabellesaporta @OpenFoodFactsFr calcule de manière citoyenne le #nutriscore de @HercbergS , en attendant leur application.																											2	12	France2tv	31444568	79	90	nutriscore					Twitter Web Client
jsonBE4.csv	2018-01-15 14:26:10	Nick Eardley	BBC Political Correspondent. Stories/tips etc: nick.eardley@bbc.co.uk. Views all mine	London		en				57288936	#Food #labelling should reflect #health policy: consultant https://t.co/7D8OtZjUSB #publichealth #consumers #Agribusiness		BE	België	Feature	4.34734	50.8007	4.40339	50.8406	city	3060d31f8bf75f53	Elsene	Elsene, België	59	82	https://t.co/7D8OtZjUSB	https://www.foodmanufacture.co.uk/Article/2018/01/12/Food-labelling-should-reflect-health-policy-consultant#.WlyrrRyJaqY.twitter	foodmanufacture.co.uk/Article/2018/0…														0	5	Food					Twitter for iPhone
jsonBE4.csv	2017-09-21 12:03:39					en				151395664	#CETA comes into force today. This could undermine EU rules on #GMO crops, cloning, growth hormones and labelling: https://t.co/YxzmUDIsUy https://t.co/hPQWx83W1U													115	138	https://t.co/YxzmUDIsUy	http://www.greenpeace.org/eu-unit/en/News/2017/ceta-food-safety-provisional-application/	greenpeace.org/eu-unit/en/New…														0	5	CETA					Twitter Web Client
jsonBE4.csv													BE	België	Feature	4.40451	50.8185	4.47632	50.8486	city	d387f190f71dda2b	Sint-Pieters-Woluwe	Sint-Pieters-Woluwe, België																			83	96	publichealth
jsonBE4.csv																																										122	132	nutrition
jsonBE4.csv																																						26	34	Food_EU	2874880006	176	184	FeedLaw
jsonBE4.csv																																						69	84	ArtisanFoodLaw	401597565
jsonBE4.csv																																										129	142	healthclaims
jsonBE4.csv																																										84	94	nutrition
jsonBE4.csv																																										107	110	UX
jsonBE4.csv																													99	105	0.5853	Product	android	entity	10026364281	Apple		9	23	FoodNavigator	105079480
jsonBE4.csv																																		entity	10026820777	Android
jsonBE4.csv																																		domain	48	Product	Products created by Brands. Examples: Ford Explorer, Apple iPhone.
jsonBE4.csv																																		entity	10044903039	Apple - iOS
jsonBE4.csv																																		entity	10044903039	Apple - iOS
jsonBE4.csv																													101	107	0.5509	Product	android	entity	10026364281	Apple		14	28	FoodNavigator	105079480
jsonBE4.csv																																		entity	10044903039	Apple - iOS
jsonBE4.csv																																		domain	47	Brand	Brands and Companies
jsonBE4.csv																																		domain	48	Product	Products created by Brands. Examples: Ford Explorer, Apple iPhone.
jsonBE4.csv																																		entity	10044903039	Apple - iOS
jsonBE4.csv																																		domain	47	Brand	Brands and Companies
jsonBE4.csv																																		entity	10026820777	Android
jsonBE4.csv																																		entity	10026820777	Android
jsonBE4.csv																																		domain	47	Brand	Brands and Companies
jsonBE4.csv																																		entity	10026820777	Android
jsonBE4.csv																																		entity	10044903039	Apple - iOS
jsonBE4.csv																																		domain	47	Brand	Brands and Companies
jsonBE4.csv																																		entity	10026820777	Android
jsonBE4.csv																													82	88	0.7629	Product	Android	entity	10026364281	Apple		97	113	OpenFoodFactsEs	615337193
jsonBE4.csv																																		entity	10026820777	Android
jsonBE4.csv																																		domain	48	Product	Products created by Brands. Examples: Ford Explorer, Apple iPhone.
jsonBE4.csv																																		entity	10044903039	Apple - iOS
jsonBE4.csv																													82	88	0.7629	Product	Android	entity	10026364281	Apple		97	113	OpenFoodFactsEs	615337193
jsonBE4.csv																																		domain	47	Brand	Brands and Companies
jsonBE4.csv																																		entity	10044903039	Apple - iOS
jsonBE4.csv																													79	85	0.7629	Product	Android	entity	10026364281	Apple		94	110	OpenFoodFactsEs	615337193
jsonBE4.csv																																		domain	47	Brand	Brands and Companies
jsonBE4.csv																																		entity	10026820777	Android
jsonBE4.csv																																		entity	10044903039	Apple - iOS
jsonBE4.csv																													76	82	0.7629	Product	Android	entity	10026364281	Apple		91	107	OpenFoodFactsEs	615337193
jsonBE4.csv																																		domain	47	Brand	Brands and Companies
jsonBE4.csv																																		entity	10026820777	Android
jsonBE4.csv																																		entity	10044903039	Apple - iOS
jsonBE4.csv																													83	89	0.7629	Product	Android	entity	10026364281	Apple		98	114	OpenFoodFactsEs	615337193
jsonBE4.csv																																		domain	47	Brand	Brands and Companies
jsonBE4.csv																													79	85	0.7629	Product	Android	entity	10026364281	Apple		94	110	OpenFoodFactsEs	615337193
jsonBE4.csv																																		domain	47	Brand	Brands and Companies
jsonBE4.csv																																		entity	10026820777	Android
jsonBE4.csv																																		domain	48	Product	Products created by Brands. Examples: Ford Explorer, Apple iPhone.
jsonBE4.csv																																		entity	10044903039	Apple - iOS
jsonBE4.csv																													81	87	0.7629	Product	Android	entity	10026364281	Apple		96	112	OpenFoodFactsEs	615337193
jsonBE4.csv																																		domain	47	Brand	Brands and Companies
jsonBE4.csv																													83	89	0.7629	Product	Android	entity	10026364281	Apple		98	114	OpenFoodFactsEs	615337193
jsonBE4.csv																																		domain	47	Brand	Brands and Companies
jsonBE4.csv																																		entity	10026820777	Android
jsonBE4.csv																																		domain	48	Product	Products created by Brands. Examples: Ford Explorer, Apple iPhone.
jsonBE4.csv																																		entity	10044903039	Apple - iOS
jsonBE4.csv																													77	83	0.7629	Product	Android	entity	10026364281	Apple		92	108	OpenFoodFactsEs	615337193
jsonBE4.csv																																		domain	47	Brand	Brands and Companies
jsonBE4.csv																																		entity	10026820777	Android
jsonBE4.csv																																		domain	48	Product	Products created by Brands. Examples: Ford Explorer, Apple iPhone.
jsonBE4.csv																																		entity	10026820777	Android
jsonBE4.csv																																		domain	48	Product	Products created by Brands. Examples: Ford Explorer, Apple iPhone.
jsonBE4.csv																																		entity	10044903039	Apple - iOS
jsonBE4.csv																													99	105	0.7649	Product	Android	entity	10026364281	Apple		16	32	Gastronomiaycia	44128619
jsonBE4.csv																																		domain	47	Brand	Brands and Companies	114	130	OpenFoodFactsEs	615337193
jsonBE4.csv																																		entity	10026820777	Android
jsonBE4.csv																																		domain	48	Product	Products created by Brands. Examples: Ford Explorer, Apple iPhone.
jsonBE4.csv																																		entity	10044903039	Apple - iOS
jsonBE4.csv																													82	88	0.7629	Product	Android	entity	10026364281	Apple		97	113	OpenFoodFactsEs	615337193
jsonBE4.csv																																		domain	47	Brand	Brands and Companies
jsonBE4.csv																																		entity	10026820777	Android
jsonBE4.csv																																		domain	48	Product	Products created by Brands. Examples: Ford Explorer, Apple iPhone.
jsonBE4.csv																																		entity	10044903039	Apple - iOS
jsonBE4.csv																													78	84	0.7629	Product	Android	entity	10026364281	Apple		93	109	OpenFoodFactsEs	615337193
jsonBE4.csv																																		domain	47	Brand	Brands and Companies
jsonBE4.csv																																		entity	10026820777	Android
jsonBE4.csv																																		domain	48	Product	Products created by Brands. Examples: Ford Explorer, Apple iPhone.
jsonBE4.csv																																		entity	10044903039	Apple - iOS
jsonBE4.csv																													79	85	0.7629	Product	Android	entity	10026364281	Apple		94	110	OpenFoodFactsEs	615337193
jsonBE4.csv																																		domain	47	Brand	Brands and Companies
jsonBE4.csv																																		entity	10026820777	Android
jsonBE4.csv																																		domain	48	Product	Products created by Brands. Examples: Ford Explorer, Apple iPhone.
jsonBE4.csv																																		entity	10044903039	Apple - iOS
jsonBE4.csv																													83	89	0.7629	Product	Android	entity	10026364281	Apple		98	114	OpenFoodFactsEs	615337193
jsonBE4.csv																																		domain	47	Brand	Brands and Companies
jsonBE4.csv																																		entity	10026820777	Android
jsonBE4.csv																																		domain	48	Product	Products created by Brands. Examples: Ford Explorer, Apple iPhone.
jsonBE4.csv																																		entity	10044903039	Apple - iOS
jsonBE4.csv																													93	99	0.7649	Product	Android	entity	10026364281	Apple		12	26	VisionChiapas	368089081
jsonBE4.csv																																		domain	47	Brand	Brands and Companies	108	124	OpenFoodFactsEs	615337193
jsonBE4.csv																																		entity	10026820777	Android
jsonBE4.csv																																		domain	48	Product	Products created by Brands. Examples: Ford Explorer, Apple iPhone.
jsonBE4.csv																																		entity	10044903039	Apple - iOS
jsonBE4.csv																													81	87	0.7629	Product	Android	entity	10026364281	Apple		96	112	OpenFoodFactsEs	615337193
jsonBE4.csv																																		domain	47	Brand	Brands and Companies
jsonBE4.csv																																		entity	10026820777	Android
jsonBE4.csv																																		domain	48	Product	Products created by Brands. Examples: Ford Explorer, Apple iPhone.
jsonBE4.csv																																		entity	10044903039	Apple - iOS
jsonBE4.csv																													81	87	0.7603	Product	Android	entity	10026364281	Apple		96	112	OpenFoodFactsEs	615337193
jsonBE4.csv																																		domain	47	Brand	Brands and Companies
jsonBE4.csv																																		entity	10026820777	Android
jsonBE4.csv																																		domain	48	Product	Products created by Brands. Examples: Ford Explorer, Apple iPhone.
jsonBE4.csv																																		entity	10044903039	Apple - iOS
jsonBE4.csv																													82	88	0.7603	Product	Android	entity	10026364281	Apple		97	113	OpenFoodFactsEs	615337193
jsonBE4.csv																																		domain	47	Brand	Brands and Companies
jsonBE4.csv																																		entity	10026820777	Android
jsonBE4.csv																																		domain	48	Product	Products created by Brands. Examples: Ford Explorer, Apple iPhone.
jsonBE4.csv																																		entity	10044903039	Apple - iOS
jsonBE4.csv																													82	88	0.7603	Product	Android	entity	10026364281	Apple		97	113	OpenFoodFactsEs	615337193
jsonBE4.csv																																		domain	47	Brand	Brands and Companies
jsonBE4.csv																																		entity	10026820777	Android
jsonBE4.csv																																		domain	48	Product	Products created by Brands. Examples: Ford Explorer, Apple iPhone.
jsonBE4.csv																																		entity	10044903039	Apple - iOS
jsonBE4.csv																													80	86	0.7603	Product	Android	entity	10026364281	Apple		95	111	OpenFoodFactsEs	615337193
jsonBE4.csv																																		domain	47	Brand	Brands and Companies
jsonBE4.csv																																		entity	10026820777	Android
jsonBE4.csv																																		domain	48	Product	Products created by Brands. Examples: Ford Explorer, Apple iPhone.
jsonBE4.csv																																		entity	10044903039	Apple - iOS
jsonBE4.csv																													79	85	0.7603	Product	Android	entity	10026364281	Apple		94	110	OpenFoodFactsEs	615337193
jsonBE4.csv																																		domain	47	Brand	Brands and Companies
jsonBE4.csv																																		entity	10026820777	Android
jsonBE4.csv																																		domain	48	Product	Products created by Brands. Examples: Ford Explorer, Apple iPhone.
jsonBE4.csv																																		entity	10044903039	Apple - iOS
jsonBE4.csv																													109	115	0.7634	Product	Android	entity	10026364281	Apple		13	29	SamuelNutriChil	1636992931
jsonBE4.csv																																		domain	47	Brand	Brands and Companies	30	43	apaolocastro	263332086
jsonBE4.csv																																		entity	10026820777	Android		124	140	OpenFoodFactsEs	615337193
jsonBE4.csv																																		domain	48	Product	Products created by Brands. Examples: Ford Explorer, Apple iPhone.
jsonBE4.csv																																		entity	10044903039	Apple - iOS
jsonBE4.csv																													83	89	0.6629	Product	Android	entity	10026364281	Apple		100	116	OpenFoodFactsEs	615337193
jsonBE4.csv																													93	95	0.6115	Product	iOS	domain	47	Brand	Brands and Companies
jsonBE4.csv																																		entity	10026820777	Android
jsonBE4.csv																																		domain	48	Product	Products created by Brands. Examples: Ford Explorer, Apple iPhone.
jsonBE4.csv																																		entity	10044903039	Apple - iOS
jsonBE4.csv																																		entity	10026364281	Apple		115	131	OpenFoodFactsEs	615337193
jsonBE4.csv																																		domain	47	Brand	Brands and Companies
jsonBE4.csv																																		entity	10026820777	Android
jsonBE4.csv																																		domain	48	Product	Products created by Brands. Examples: Ford Explorer, Apple iPhone.
jsonBE4.csv																																		entity	10044903039	Apple - iOS
jsonBE4.csv																																										131	136	Food
jsonBE4.csv																																						14	24	HercbergS	2333109386
jsonBE4.csv																																						89	103	OpenFoodFacts	583814681
jsonBE4.csv																								145	168	https://t.co/E6r32ftbGq	https://twitter.com/Teolemon/status/842021669501829120/photo/1	pic.twitter.com/E6r32ftbGq										106	120	OpenFoodFacts	583814681
jsonBE4.csv																																						77	91	OpenFoodFacts	583814681
jsonBE4.csv																																						13	29	isabellesaporta	2371678640
jsonBE4.csv																																						30	46	OpenFoodFactsFr	584043179
jsonBE4.csv																																						94	104	HercbergS	2333109386
jsonBE4.csv		Alexis Dumas	Contactez-moi pour tous vos projets de #construction 🔨 Je vais vous aider avec la realisation de vos plans et devis.	Quebec,qc																														entity	10026820777	Android
jsonBE4.csv		Asador Katuzarra	Asador restaurante con dos plantas de 400 m2 en total. Comida de asador de calidad y una decoracion que no te puedes perder.	Calle San Nicolas 34, Pamplona																														domain	48	Product	Products created by Brands. Examples: Ford Explorer, Apple iPhone.
jsonBE4.csv		Auxihosteleria	Auxihosteleria.es es una empresa especializada en todo tipo de maquinaria auxiliar para la hostelería y alimentación	Zaragoza, España																														entity	10044903039	Apple - iOS
jsonBE4.csv		Business Insider	What you want to know about business. A section of @thisisinsider. Follow us on Facebook, Instagram, and YouTube. Visit our homepage for the day's top stories.	New York, NY																									92	98	0.5852	Product	android	entity	10026364281	Apple		77	91	OpenFoodFacts	583814681
jsonBE4.csv		Cakes a medida	Disfrutando de la repostería artesana, aprendiendo de redes sociales, Marketing online, ...	Madrid																														domain	48	Product	Products created by Brands. Examples: Ford Explorer, Apple iPhone.
jsonBE4.csv		Carla Vanessa	Abogada @UANL y Consultora de Asuntos Públicos en #CamaraDeDiputados	Mexico																														domain	47	Brand	Brands and Companies	113	129	OpenFoodFactsEs	615337193
jsonBE4.csv		Carlos Aquino	Hagamos de lo Virtual Una Realidad Automatizacion, Calor y Control - Mexico Industrial Supplier - Te sigo... =)	World Wide																														domain	47	Brand	Brands and Companies
jsonBE4.csv		CasaGuinart Boqueria	Casa Guinart, located in the heart of Barcelona, next to the legendary La Boqueria market.\r\n Ramblas 95, 08002 Barcelona \r\n 933178887	Barcelona																														domain	48	Product	Products created by Brands. Examples: Ford Explorer, Apple iPhone.
jsonBE4.csv		Chef Mike Abascal	Mi pasión es cocinar.																															entity	10044903039	Apple - iOS
jsonBE4.csv		Christina Sadler	British Brexit-Belgian. Communicating science on food and health @EUFIC. Postgraduate researcher @UniOfSurrey.	Brussels, Belgium																														domain	48	Product	Products created by Brands. Examples: Ford Explorer, Apple iPhone.
jsonBE4.csv		Córdoba Gourmet	Compartiendo artículos de #gastronomía #gourmet desde Córdoba • by @josemarimayoral	Córdoba, España																									81	87	0.7629	Product	Android	entity	10026364281	Apple		96	112	OpenFoodFactsEs	615337193
jsonBE4.csv		CosasFácilesdeCasa	Blog que colaboran sobre todo tipo de temáticas. Unidos ganamos Mas!																															domain	48	Product	Products created by Brands. Examples: Ford Explorer, Apple iPhone.
jsonBE4.csv		De Gusto y Disgusto	Comentando lo que nos gusta y lo que no, de los lugares que visitamos. Tips, consejos, eventos, recetas y más.	Venezuela																														domain	48	Product	Products created by Brands. Examples: Ford Explorer, Apple iPhone.
jsonBE4.csv		Defra UK	Official feed for Defra, UK Department for Environment, Food and Rural Affairs. Please note: we do not respond to queries on social media.	UK																														entity	10026820777	Android
jsonBE4.csv		Dra. Luisa Solano Pérez	#Nutritionist . MSc. #PhD #nutrition #dietetics #dysfagia #gastronomy and #EVOO #AOVE #luisasolanonut																															entity	10044903039	Apple - iOS
jsonBE4.csv		EU Food Safety	We are ensuring Safe Food 🍏, Animal Welfare 🐮 & Plant Health 🌱 within the 🇪🇺 through coherent #EUFarm2Fork measures	Brussels																																		24	38	OpenFoodFacts	583814681
jsonBE4.csv		EurocareBrussel	European Alcohol #Policy Alliance. \nWe work to #prevent and reduce #alcohol-related harm in #Europe 🇪🇺	Brussels																									79	85	0.7629	Product	Android	entity	10026364281	Apple		94	110	OpenFoodFactsEs	615337193
jsonBE4.csv		Fogones Virtuales	#Recetas, todo el mundo de la #cocina además de buena música y todo lo que da alegría en la vida.	Valencia, Spain																														entity	10044903039	Apple - iOS
jsonBE4.csv		franz Hanoff																											80	86	0.7629	Product	Android	entity	10026364281	Apple		95	111	OpenFoodFactsEs	615337193
jsonBE4.csv		Gastronomía y Cía	Blog de gastronomía, cocina, recetas, restaurantes, actualidad, eventos, vinos, viajes, ciencia culinaria, salud... Creamos recetas y cocinamos tradición																															entity	10026820777	Android
jsonBE4.csv		Giovanni La Via	Deputato europeo. Membro delle Commissioni Ambiente e Bilanci. / @forza_italia - @PPE_IT	Bruxelles - Catania																									83	89	0.765	Product	Android	entity	10026364281	Apple		98	114	OpenFoodFactsEs	615337193
jsonBE4.csv		GourmetFeed	Información de interés sobre #gastronomía, #vinos y #turismo, GastroFeed.																															domain	48	Product	Products created by Brands. Examples: Ford Explorer, Apple iPhone.
jsonBE4.csv		Hercberg Serge	Professeur de Nutrition, Faculté Médecine Université Sorbonne Paris Nord (ex Paris 13)\nEquipe de Recherche en Epidémiologie Nutritionnelle Inserm/Inra/Cnam/UP13	Paris, France																														domain	47	Brand	Brands and Companies
jsonBE4.csv		Isabelle Saporta	Directrice littéraire chez Fayard Instagram :isabelle_saporta																										81	87	0.7629	Product	Android	entity	10026364281	Apple		96	112	OpenFoodFactsEs	615337193
jsonBE4.csv		James Nicholls	Chief Executive Officer of Transform Drug Policy Foundation @transformdrugs	Bristol																														entity	10044903039	Apple - iOS
jsonBE4.csv		Jean-Claude Juncker	Luxembourger. European.	Europe																														entity	10044903039	Apple - iOS
jsonBE4.csv		Jorge Valencia	Ingeniero - Experto Comisionado CREG - Cuenta Personal	Medellín, Colombia																									98	104	0.7766	Product	Android	entity	10026364281	Apple		17	33	Gastronomiaycia	44128619
jsonBE4.csv		Las Recetas de Carol	Soy Carolina, de Burgos, #Blogger Si te gusta la #cocina y la #gastronomía te invito a seguirme y descubrir #eventos, #recetas y #productos interesantes.	Madrid																														domain	48	Product	Products created by Brands. Examples: Ford Explorer, Apple iPhone.
jsonBE4.csv		maghrebsante																																domain	48	Product	Products created by Brands. Examples: Ford Explorer, Apple iPhone.
jsonBE4.csv		Meal Solutions	¿No quieres/puedes/sabes cocinar? MEAL SOLUTIONS es tu receta. Soluciones Inteligentes de comida para todas las ocasiones																															domain	48	Product	Products created by Brands. Examples: Ford Explorer, Apple iPhone.
jsonBE4.csv		Miguel Solanes	Simplemente cine, vino y sushi. #gastronomia																															entity	10026820777	Android
jsonBE4.csv		Milka Sokolović	Scientist, mama, foodie, sportie / Director General @EPHA_EU / Once: Head of Sci @EUFIC/ Director @ENLP_lead/ BiomedSci @amsterdamumc/ Genetics @Univerzitet_BG	Brussels																									111	113	0.9503	Product	iOS	domain	47	Brand	Brands and Companies	84	98	OpenFoodFacts	583814681
jsonBE4.csv		Noticias Albacete	Todas las Noticias de #Albacete \n\nContacto: https://t.co/wyFd5vCQOz	Albacete, Spain																														domain	48	Product	Products created by Brands. Examples: Ford Explorer, Apple iPhone.
jsonBE4.csv		Open Food Facts @ #COP26	A collaborative, free and open database of food products from around the world.	We are everywhere !																														domain	47	Brand	Brands and Companies
jsonBE4.csv		OpenFoodFacts fr	Un projet collaboratif pour créer une base de données libre et ouverte sur les produits alimentaires.	Saint-Maur des Fossés, France																														domain	47	Brand	Brands and Companies
jsonBE4.csv		Paolo Castro V.	Director Nutrición y Dietética U. CENTRAL, Pdte. Colegio de Nutricionistas de Chile (2017-2019).\nNutricionista\nNutrición MINSAL (2012-2015)	Chile																														entity	10026820777	Android
jsonBE4.csv		Para 507 PTY	Informando todo lo que sucede en Panamá y el mundo. Siguenos para que estes al tanto de todo lo que acontece en el diario vivir.	Panamá																														entity	10026820777	Android
jsonBE4.csv		Patricia	Enamorada de la buena cocina, aqui encontrareis una selección de las mejores recetas.																															entity	10026820777	Android
jsonBE4.csv		Pavel Poc		Česká republika																														entity	10044903039	Apple - iOS
jsonBE4.csv		Pierre Slamich @ COP26 🌍 - 🤳🥫	@OpenFoodFacts & @OpenBeautyFacts cofounder - previously @StationF @Google @SciencesPo #foodtech #cosmetics #opendata	Paris																														entity	10026820777	Android
jsonBE4.csv		Placeres del Paladar																																entity	10044903039	Apple - iOS
jsonBE4.csv		Recetags	▶ Miles de recetas a un solo clic ◀ Descubre las #recetas de cocina de los mejores blogs y crea tu propio #recetario. ➡ https://t.co/7gwcGJu3T8	equipo@recetags.com																									81	87	0.7629	Product	Android	entity	10026364281	Apple
jsonBE4.csv		Samuel Durán Agüero	Nutricionista PhD en Nutrición y Alimentos, Msc.Promoción de la Salud																															domain	47	Brand	Brands and Companies
jsonBE4.csv		Simone Ceruti	Senior executive - Global Comms Head at Seda #packaging - #sustainability #digital #tech #consumers #innovation #socialbusiness - Here only MY opinions!	Milan																																						108	121	Agribusiness
jsonBE4.csv		sweet vintage	Creamos las fantasias de dulces , tortas creativas, hots, cupcakes y mas ..que nunca te has imaginado, con los sabores mas deliciosos SWEET VINTAGE 0414-6946375	CORO-PUNTO FIJO-VENEZUELA																														entity	10044903039	Apple - iOS
jsonBE4.csv		Tabernas de Madrid☀️	Somos lo que comemos y bebemos... pero en barra 😉.Ya somos +2.000 lugares de culto y NO solo de #Madrid #AsiMeLoEnseñaronAMi #Vino #Tapas #taberna🍷🍳🍇	Madrid, Comunidad de Madrid																														domain	48	Product	Products created by Brands. Examples: Ford Explorer, Apple iPhone.
jsonBE4.csv		Tapas de España	#TAPAS ,de España y Patrimonio de la Humanidad...Probamos y buscamos las mejores #tapeandosoyfeliz #conunatapa #TAPADELDIA #vivirtapeando #yotapeo #TapaSpain	España																														domain	47	Brand	Brands and Companies
jsonBE4.csv		Viajeros Gourmet	Una guía con lo mejor de la #gastronomía #turismo #viajes #comida #bebidas\n A guide about #gastronomy #tourism #travel #food #drinks	Venezuela																														entity	10044903039	Apple - iOS
jsonBE4.csv		Visión Chiapas	VISIÓN CHIAPAS; un nuevo concepto periodístico innovador y de vanguardia; el objetivo es dar a conocer la gastronomía, el turismo y la política de Chiapas.	Tuxtla Gutiérrez, Chiapas.																									82	88	0.7629	Product	Android	entity	10026364281	Apple		97	113	OpenFoodFactsEs	615337193
jsonBE4.csv		🌟 Nutrición & Fitness 💪	🥦🍒 Alimentación | dietas | fitness | salud 💕 Cuida tu cuerpo, mejora tu aptitud, tu autoestima y tu calidad de vida ✨. ¡Vive! #SentirmeSaludable	En la nube ☁																														entity	10026820777	Android
jsonBE5.csv	2016-12-06 18:16:45	ICC in Belgium	International Chamber of Commerce ICC in 🇧🇪 champions #multilateral #trade #investment #inclusive #growth since 1920. Chair: Vincent Reuter. Secgen: @MathMaes	Brussels		en				455775907	Food labelling benefits from EU harmonization. Confirmed during the Belgian Food industry association @fevia_be's event. https://t.co/mdlwFCQZr0		BE	België	Feature	4.31399	50.7963	4.43695	50.9137	city	0653bb913c88c1ea	Brussel	Brussel, België	121	144	https://t.co/mdlwFCQZr0	https://twitter.com/ICCBelgium/status/806185623677759488/photo/1	pic.twitter.com/mdlwFCQZr0										102	111	fevia_be	2805109885								Twitter for Android
jsonBE5.csv	2016-02-25 09:51:36					en				949341888	CONSUMERS: MEPs want to raise issue of food labelling with Commission @EP_Environment		BE	België	Feature	4.37891	50.8224	4.41148	50.8447	city	8f54da0b876827dc	Etterbeek	Etterbeek, België											domain	3	TV Shows	Television shows from around the world	70	85	EP_Environment	951333319								Twitter Web Client
jsonBE5.csv																																		entity	10032274471	Mañana es para siempre
jsonBE5.csv
jsonBE5.csv
jsonBE5.csv
jsonBE5.csv		Agence Europe	🇪🇺 Éditeur bilingue spécialisé dans l'information européenne fiable depuis 1953\n🇪🇺 Bilingual publisher specialising in in-depth and factual European news	Bruxelles
jsonBE5.csv		ENVI Committee Press	European Parliament Committee on Environment, Public Health and Food Safety. Managed by Thomas Haahr & Dana Popp. RTs ≠ endorsement.	Brussels/Strasbourg
jsonBE5.csv		Fevia	Federatie van de Belgische voedingsindustrie - Fédération de l’industrie alimentaire belge	Belgium
jsonBE6.csv	2015-05-21 10:02:40	EUROPOLITICS	Official account of the independent EU daily.\nAuthoritative news, comment and analysis on EU affairs since 1972. Follow us for updates and developments	Brussels	en	en	14234858	How are popular views of food &amp; #nutrition influencing what consumers buy? Our 8 top trends to watch: http://t.co/LQuljp3J75		1731731006	MT @AgataDuczmal: Origin #food #labelling reports published @EU_Agri http://t.co/GXpzZhl837 @EU_Health http://t.co/aOMFtAF6uE		BE	België	Feature	4.39999	50.8338	4.4629	50.8631	city	6a1de1c2441194ef	Sint-Lambrechts-Woluwe	Sint-Lambrechts-Woluwe, België	69	91	http://t.co/GXpzZhl837	http://bit.ly/1EYwQCm	bit.ly/1EYwQCm										3	16	AgataDuczmal	594530688	25	30	food					Twitter for Android
jsonBE6.csv	2014-11-25 20:47:14	Monica Frassoni	True believer in a united green EU - President of the European Alliance to Save Energy @EUASE - President of the European Center for Electoral support @ECESeu	Brussel, België		en				138717046	Utterly mental. 'Novel food defined as any food not used for human consumption within the EU before 15 May 1997'\r\rhttp://t.co/9hvK3npAmR													114	136	http://t.co/9hvK3npAmR	http://www.europarl.europa.eu/news/en/news-room/content/20141125IPR80424/html/Novel-foods-MEPs-call-for-moratorium-on-nano-foods-and-labelling-of-cloned-meat	europarl.europa.eu/news/en/news-r…																		Point	5.73763451	49.69024345	Twitter for Windows Phone
jsonBE6.csv	2014-12-16 12:48:53	* relocated *	See | @EUAgri | for the European Commission's DG for Agriculture & Rural Development.			nl				2250688218	Overzichtstabel die de nieuwe food labelling wetgeving (Verordening 1169/2011) toelicht: http://t.co/PESKz6AvTK		BE	België	Feature	5.67849	49.6219	5.91096	49.7272	city	eafe956dbadfac64	Arlon	Arlon, Belgique	89	111	http://t.co/PESKz6AvTK	http://ec.europa.eu/food/food/labellingnutrition/foodlabelling/docs/infographic_food_labelling_rules_2014_en.pdf	ec.europa.eu/food/food/labe…																					Twitter Web Client
jsonBE6.csv	2015-02-09 19:18:23					en				96366187	For more transparency in the #food chain @GreensEP will vote YES to country of origin labelling of processed meat on Wednesday 11/02		BE	België	Feature	4.37891	50.8224	4.41148	50.8447	city	8f54da0b876827dc	Etterbeek	Etterbeek, België															41	50	GreensEP	1.14821e+18	29	34	food		Point	4.36099601	50.85312355	Twitter for iPhone
jsonBE6.csv	2014-12-11 17:55:03	EU Health	EU Commission's DG Health & Food Safety (SANTE). We are building the foundations of a stronger European #HealthUnion RT ≠ endorsement. Food tweets @Food_EU	Brussels, Europe		en				522158788	Food: better labelling as of 13 December 2014 http://t.co/MQ1w4LjpmW #aeidl #local		BE	België	Feature	4.34734	50.8007	4.40339	50.8406	city	3060d31f8bf75f53	Elsene	Elsene, België	46	68	http://t.co/MQ1w4LjpmW	http://dlvr.it/7nkyQv	dlvr.it/7nkyQv														69	75	aeidl		Point	4.39390579	50.83739703	dlvr.it
jsonBE6.csv	2014-09-30 11:15:17					en				42923223	Food #certification or #labelling how does it affect #consumers &amp; producers? Join #EUFoodchat tomorrow! @EU_CoR @EPP http://t.co/ojd3G2pAmT													121	143	http://t.co/ojd3G2pAmT	https://twitter.com/dkrakowiak_eu/status/516878941588848640/photo/1	pic.twitter.com/ojd3G2pAmT										108	115	EU_CoR	567272864	5	19	certification					Twitter Web Client
jsonBE6.csv	2014-07-01 18:26:45	Bruno Waterfield	Newspaper journalist by trade - the Times. No Brexit threads. Read the newspaper	Belgium		en				36205090	@Fleishman interesting and linked to our #euopendays workshop on #EU food&amp;wine labelling and promotion	replied_to																										0	10	Fleishman	14234858	41	52	euopendays	14234858	Point	4.3708368	50.8378988	Twitter for Android
jsonBE6.csv													BE	België	Feature	3.68304	50.9335	3.79094	51.0274	city	709d215e529a6da8	Merelbeke	Merelbeke, België															92	102	EU_Health	606325697
jsonBE6.csv																																										76	82	local
jsonBE6.csv
jsonBE6.csv
jsonBE6.csv
jsonBE6.csv
jsonBE6.csv
jsonBE6.csv
jsonBE6.csv
jsonBE6.csv
jsonBE6.csv		-	We've moved to 👉 @GreensEFA																																			116	120	EPP	93687642	23	33	labelling
jsonBE6.csv		AEIDL	[EN] The European Association for Information on Local Development. 🇪🇺\n[FR] Association Européenne pour l’Information sur le Développement Local (#AEIDL)	Bruxelles, Belgique																																						86	97	EUFoodchat
jsonBE6.csv		AgataSpissu	#Food and #Health Policy Consultant @BMBrussels. Loves good food, Italy and Yoga.Tweets are my own.	Brussels									BE	België	Feature	4.31399	50.7963	4.43695	50.9137	city	0653bb913c88c1ea	Brussel	Brussel, België	103	125	http://t.co/aOMFtAF6uE	http://bit.ly/1Hv8C9I	bit.ly/1Hv8C9I										60	68	EU_Agri	9.23895e+17	31	41	labelling
jsonBE6.csv		Dominik Krakowiak	European Pole in Bxl 🇪🇺🇵🇱🇹🇩 Social Media Coordinator at @EU_Commission\nex @EUInterpreters @EU_CEPOL @EASO @EU_CoR @Europarl_PL\nViews my own!	Brussels, Belgium																																						65	68	EU
jsonBE6.csv		ECCA	Analyses Food, Feed, Environment	Merelbeke, BE																																						53	63	consumers
jsonBE6.csv		EPP	The European People's Party; centre-right; largest political family in EU. #WeAreFamily	Winner of #EUelections2019
jsonBE6.csv		European Committee of the Regions	Latest news from the EU's Assembly of Regional and Local Representatives\nhttps://t.co/HC4mOTm1JO…	Brussels, Belgium
jsonBE6.csv		FleishmanHillard	A seamless, global communications firm delivering the #poweroftrue in a world demanding unprecedented authenticity.	Worldwide
jsonBE6.csv		Katie Owens	#EUComms on health and food safety (@EU_Health and @Food_EU), 🍀 & proud 🇪🇺 Views expressed here are my own and not those of my employer	Brussels
jsonBE7.csv	2013-12-18 00:16:33	Simone Ceruti	Senior executive - Global Comms Head at Seda #packaging - #sustainability #digital #tech #consumers #innovation #socialbusiness - Here only MY opinions!	Milan		en				57288936	In AGRI Council: Italy rallied support from 15 countries against the UK "Traffic lights" #nutrition #labelling system #food #EU		BE	België	Feature					city	3060d31f8bf75f53	Elsene	Elsene, België						17	21	0.968	Place	Italy									89	99	nutrition		Point			Twitter for iPhone
jsonBE7.csv																													69	70	0.8935	Place	UK									100	110	labelling
jsonBE7.csv																																										118	123	food
jsonBE7.csv																																										124	127	EU
jsonBE7.csv
jsonBE7.csv
jsonBE7.csv
jsonBE8.csv	2013-03-06 15:04:14	Nico	Do not commit any non-virtuous actions, Perform only perfect virtuous actions, Subdue your mind thoroughly- This is the teaching of the Buddha.	Lavaur, France		en				18230307	#gmofree #labelling of food products event organised by @GMOFreeEU (@ European Parliament w/ 9 others) http://t.co/3NY8Wuirl8		BE	België	Feature					city	3060d31f8bf75f53	Elsene	Elsene, België	103	125	http://t.co/3NY8Wuirl8	http://4sq.com/14t1PVw	4sq.com/14t1PVw										56	66	GMOFreeEU	1094829409	0	8	gmofree		Point			Foursquare
jsonBE8.csv
jsonBE8.csv
jsonBE8.csv		For a GMO-free EU		Brussels																																						9	19	labelling
jsonBE9.csv	2011-01-23 17:39:36	Giedo De Snijder	With a Passion for the real stuff - the Archetypes of Authenticity and Taste - aka HandMade Cheese, I have built up 30 years of field Experience. Need a Help?	Rotselaar Belgium		en				109798621	Food labelling confuses ethical shoppers, says Guardian survey http://bit.ly/f9bugr #foodlabels																															84	95	foodlabels					TweetDeck
jsonBG1.csv	2020-09-12 05:59:07	stevens_craig	Still not moving on..... Still using the term Brexit....European who supports the European project.	London, Ruse, Burgas.		en				292301131	I would suggest people look at the reason why food could be a issue entering the EU after 1Jan 2021 my understanding is food manufacturers needed clear guide lines by the end of August at the latest from the government for package labelling. Seems incopetence is being hidden.		BG	България	Feature					country	1ef1183ed7056dc1	България	България						81	82	0.7791	Organization	EU																Twitter for Android
jsonBG1.csv
jsonBG1.csv
jsonBG1.csv
jsonBG2.csv	2018-02-06 12:27:03	Emma Calvert	Senior Food Policy Officer, European Consumer Organisation (@BEUC) Working on reformulation, marketing to kids and food labelling. (On mat leave)	Brussels, Belgium		en				349027336	At Bulgarian Presidency event on 'Healthy Nutrition for Children' WHO's Joao Breda highlighting the need for more countries to implement FOP labelling schemes #EU2018BG https://t.co/cPO5L4ughL		BG	България	Feature					country	1ef1183ed7056dc1	България	България	169	192	https://t.co/cPO5L4ughL	https://twitter.com/EmmaCalvert3/status/960837236240666625/photo/1	pic.twitter.com/cPO5L4ughL	72	81	0.5189	Person	Joao Breda	domain	65	Interests and Hobbies Vertical	Top level interests and hobbies groupings, like Food or Travel					159	168	EU2018BG					Twitter for iPhone
jsonBG2.csv																																		entity	9.03304e+17	Wellness and health	Wellness & Health
jsonBG2.csv																																		domain	67	Interests and Hobbies	Interests, opinions, and behaviors of individuals, groups, or cultures; like Speciality Cooking or Theme Parks
jsonBG2.csv																																		entity	9.17859e+17	Healthy Eating	Healthy Eating
jsonCY1.csv	2021-10-04 14:27:27	Frini Onoufriou	Μέλος της κεντρικής επιτροπής Κινήματος Οικολόγων-Συνεργασίας Πολιτών\nΟργανωτική Επαρχιακής Λεμεσού\nΟργανωτική γραμματέας ΓΥΚΟ			en				2222309417	The European Commission is asking for our opinion about a new generation of #GMOs. It could sneak GM food onto our fields and plates without proper safety testing and labelling. I’ve just told them I want #NoNewGMOs. https://t.co/llANZbw9po		CY	Cyprus	Feature					country	f0af1239cbebb474	Cyprus	Cyprus	217	240	https://t.co/llANZbw9po	https://act.greens-efa.eu/keep-gmo-out-of-our-food?source=gg_email_gmos_2021-10-04&link_id=1&can_id=8ff127462ee37f1d259f08d11a2a6b13&email_referrer=email_1311659&email_subject=the-eu-could-allow-gmos-on-our-fields-and-plates-without-safety-testing-or-labelling&utm_source=share&utm_medium=twitter&utm_campaign=Ts7iQY8RfscEvk3KOh62iEwDocMZahagpjOitJm3W0E	act.greens-efa.eu/keep-gmo-out-o…	4	22	0.4087	Organization	European Commission	domain	46	Brand Category	Categories within Brand Verticals that narrow down the scope of Brands					76	81	GMOs					Twitter for Android
jsonCY1.csv																																		entity	7.81975e+17	Services						205	215	NoNewGMOs
jsonCY1.csv																																		domain	48	Product	Products created by Brands. Examples: Ford Explorer, Apple iPhone.
jsonCY1.csv																																		entity	1.41258e+18	Google Innovation
jsonCY1.csv																																		domain	65	Interests and Hobbies Vertical	Top level interests and hobbies groupings, like Food or Travel
jsonCY1.csv																																		entity	9.03304e+17	Wellness and health	Wellness & Health
jsonCY1.csv																																		domain	30	Entities [Entity Service]	Entity Service top level domain, every item that is in Entity Service should be in this domain
jsonCY1.csv																																		entity	1.26099e+18	Holistic healing/nutrition	Food
jsonCY1.csv																																		domain	67	Interests and Hobbies	Interests, opinions, and behaviors of individuals, groups, or cultures; like Speciality Cooking or Theme Parks
jsonCY1.csv																																		entity	9.17867e+17	Organic foods	Food
jsonCY1.csv																																		domain	30	Entities [Entity Service]	Entity Service top level domain, every item that is in Entity Service should be in this domain
jsonCY1.csv																																		entity	1.26099e+18	Organic
jsonCY2.csv	2018-10-12 11:58:11	Eoghan Ronan Owen	Retired General & Colorectal Surgeon	moved back to Ireland63yrsinGB	en	en	14190551	Some idiot politician is bound to mark #WorldObesityDay by demanding people take personal responsibility. But if you don't know what's in your food how can you take responsibility? It's time to stop the shaming, and give people the info they need. Let's label products not people. https://t.co/NqPL7ix8Ry		1270909801	@tom_watson How ridiculous. Food labelling will not help or change obesity.Obese people know they are eating more than they need. Some are drinking too much alcohol.Several are consuming too much coke or fanta and such like. People won’t read labels and don’t understand them. Stop when full.	replied_to	CY	Cyprus	Feature					country	f0af1239cbebb474	Cyprus	Cyprus											domain	65	Interests and Hobbies Vertical	Top level interests and hobbies groupings, like Food or Travel	0	11	tom_watson	14190551				14190551				Twitter for iPhone
jsonCY2.csv																																		domain	65	Interests and Hobbies Vertical	Top level interests and hobbies groupings, like Food or Travel
jsonCY2.csv																																		entity	8.34828e+17	Drinks	Drinks
jsonCY2.csv																																		domain	67	Interests and Hobbies	Interests, opinions, and behaviors of individuals, groups, or cultures; like Speciality Cooking or Theme Parks
jsonCY2.csv																																		entity	1.00628e+18	Food experience	Conversation about eating
jsonCY2.csv																																		domain	67	Interests and Hobbies	Interests, opinions, and behaviors of individuals, groups, or cultures; like Speciality Cooking or Theme Parks
jsonCY2.csv																																		entity	1.00628e+18	Drink Experience	Drink Experience
jsonCY2.csv																																		domain	10	Person	Named people in the world like Nelson Mandela
jsonCY2.csv																																		entity	8.57229e+17	Tom Watson	Tom Watson
jsonCY2.csv																																		domain	35	Politician	Politicians in the world, like Joe Biden
jsonCY2.csv																																		entity	8.57229e+17	Tom Watson	Tom Watson
jsonCY2.csv																																		domain	45	Brand Vertical	Top level entities that describe a Brands industry
jsonCY2.csv																																		entity	7.81975e+17	CPG
jsonCY2.csv																																		domain	46	Brand Category	Categories within Brand Verticals that narrow down the scope of Brands
jsonCY2.csv																																		entity	7.81975e+17	Beverage
jsonCY2.csv																																		domain	47	Brand	Brands and Companies
jsonCY2.csv																																		entity	10026299835	Coca-Cola
jsonCY2.csv																																		domain	65	Interests and Hobbies Vertical	Top level interests and hobbies groupings, like Food or Travel
jsonCY2.csv																																		entity	8.34828e+17	Drinks	Drinks
jsonCY2.csv																																		domain	66	Interests and Hobbies Category	A grouping of interests and hobbies entities, like Novelty Food or Destinations
jsonCY2.csv																																		entity	8.34828e+17	Generic Drinks	Generic Drinks
jsonCY2.csv																																		domain	67	Interests and Hobbies	Interests, opinions, and behaviors of individuals, groups, or cultures; like Speciality Cooking or Theme Parks
jsonCY2.csv																																		entity	8.50144e+17	Soda	Soda
jsonCY2.csv		Tom Watson	Author, Podcast Host, Chair of UK Music | Management: lucy@ieents.com	Kidderminster, England																														entity	8.25048e+17	Food	Food
jsonCZ1.csv	2021-08-04 11:27:56	Český Gastronomický Institut	Rozvíjíme českou gastronomii společně u jednoho stolu.\n#ZaGastro	Praha		cs				1.33817e+18	Kdyby si @AgrarniKomora prostudovala metodiku #NutriScore, tak by neargumentovala panu @ProuzaTomas mylnou informací, že jablko vychází hůře než tyčinka s umělými sladidly. Je snad problém angličtina? 🤷🏻‍♀️ Tak zde i slovensky.\nZdroj: https://t.co/sdMhVyKlLM https://t.co/nB4nUy2mqq		CZ	Česká republika	Feature					city	0014eeda28ff323f	Žiželice	Žiželice, Česká republika	235	258	https://t.co/sdMhVyKlLM	http://nutriscoreslovakia.sk	nutriscoreslovakia.sk										9	23	AgrarniKomora	7.60759e+17	46	57	NutriScore					Twitter for iPhone
jsonCZ1.csv
jsonCZ1.csv
jsonCZ1.csv		Agrární komora ČR	Oficiální profil Agrární komory České republiky, která sdružuje většinu podnikatelů v zemědělství v České republice a hájí oprávněné zájmy svých členů.	Praha, Česká republika																																		87	99	ProuzaTomas	2317376480
jsonCZ1.csv		Tomáš Prouza	Prezident Svazu obchodu a cestovního ruchu ČR @SOCR_CR, viceprezident @hokomora a @eurocommerce, bývalý státní tajemník pro evropské záležitosti	Praha																				259	282	https://t.co/nB4nUy2mqq	https://twitter.com/czechgastronomy/status/1422851790287089666/photo/1	pic.twitter.com/nB4nUy2mqq
jsonCZ2.csv	2019-06-26 08:56:08	Facundo Etchebehere	Global Public Affairs @Danone. I am an economist with a master degree in Political Science, who works in Corporate Affairs. Views are my own, RT not endorsement	Francia		fr				42330442	Le géant Nestlé va adopter le Nutri-Score au niveau européen https://t.co/l17aLbb5re #FOP #Nutriscore		CZ	Česká republika	Feature					city	018e2bf71a3ef896	Praha	Praha, Česká republika	61	84	https://t.co/l17aLbb5re	http://www.lefigaro.fr/flash-eco/le-geant-nestle-va-adopter-le-nutri-score-au-niveau-europeen-20190626	lefigaro.fr/flash-eco/le-g…						domain	45	Brand Vertical	Top level entities that describe a Brands industry					85	89	FOP					Twitter for iPhone
jsonCZ2.csv																																		entity	7.81975e+17	CPG						90	101	Nutriscore
jsonCZ2.csv																																		domain	46	Brand Category	Categories within Brand Verticals that narrow down the scope of Brands
jsonCZ2.csv																																		entity	7.81975e+17	Candy/Gum
jsonCZ2.csv																																		domain	47	Brand	Brands and Companies
jsonCZ2.csv																																		entity	10024011447	Nestle
jsonCZ2.csv																																		domain	48	Product	Products created by Brands. Examples: Ford Explorer, Apple iPhone.
jsonCZ2.csv																																		entity	10046158484	Nestle USA
jsonCZ3.csv	2015-05-08 09:40:01					en				2329022304	Simple food labelling could be the key #ECO2015 http://t.co/aXtBgpI3mo													48	70	http://t.co/aXtBgpI3mo	https://twitter.com/SmartHealthSol/status/596580298525188096/photo/1	pic.twitter.com/aXtBgpI3mo														39	47	ECO2015					Twitter for iPhone
jsonCZ3.csv	2015-06-22 09:50:55	Gluten-Free Life	Australia's only 100% gluten-free magazine available from newsagents nationally. Recipes, healthy living, travel & more! Always gluten-free & allergy-friendly.	Sydney, Australia		en				2509488246	"It is our human right to know the ingredients in our food." Hertha Deutsch talks #glutenfree food labelling at #ICDS2015 patient forum.		CZ	Česká republika	Feature					city	018e2bf71a3ef896	Praha	Praha, Česká republika						61	74	0.5545	Organization	Hertha Deutsch									82	93	glutenfree		Point	14.50138166	50.1093759	Twitter for iPhone
jsonCZ3.csv
jsonCZ3.csv		SHS	Educational and Training services for GP's, Nurses, Pharmacists and Health Care Professionals - Improving the care that others give.	London																																						112	121	ICDS2015
jsonDE1.csv	2021-10-09 09:12:34				de	es	1.1048e+18	Zwei Mohnbrötchen\n1,20 €\n#wucher #bäcker		187973192	@FTiradores @cariocadacasca @alfajorperdido Sabes que sí existe el etiquetado frontal en europa también?\nhttps://t.co/kTmNnkTMZQ\nAntes de llorar, mejor averiguar 🙏	replied_to	DE	Deutschland	Feature	11.3606	48.0616	11.7229	48.2481	city	37439688c6302728	München	München, Deutschland	105	128	https://t.co/kTmNnkTMZQ	https://es.wikipedia.org/wiki/Nutriscore	es.wikipedia.org/wiki/Nutriscore	89	94	0.6037	Place	europa					0	11	FTiradores	1.27522e+18				1.27522e+18				Twitter for Android
jsonDE1.csv					de		8.62258e+17	Pizza mit Pizza vergleichen? Da muss man erstmal drauf kommen. Sinnvoller wäre: Ein #Label, das anzeigt, was gesund ist. #NutriScore braucht dringend ein #update sonst täuscht er Kunden eher als er ihnen hilft, die gesunde Wahl einfach zu treffen. https://t.co/1rfy0Y3DjW https://t.co/QP1RwUnGkZ	quoted																									entity	8.34828e+17	Generic Drinks	Generic Drinks
jsonDE1.csv		Assosementi	L’associazione che rappresenta in Italia il settore #sementiero. Diamo voce alle #sementi, il primo anello della filiera #agroalimentare.	Bologna, Emilia Romagna	es		259207561	No es fake, no...\n\nEl Gobierno concede excluir al aceite de la lista de alimentos perjudiciales pero no el jamón https://t.co/44mo9vYHcp vía @abcdesevilla																														228	239	COPACOGECA	475624182
jsonDE1.csv	2021-07-13 18:58:00	Catador de alfajores	Una cuenta dedicada a comer alfajores y vivir para contarlo. Escribí «En busca del alfajor perdido» (2020, Planeta).	Buenos Aires, Argentina	de	de	7.83238e+17	Heute ist mir ein sog. "Nutri-Score" über den Weg gelaufen.\n\nAuf Nesquik Kakaopulver.\n75% Zucker.\n\nEs ist ein GRÜNES B.\n\nAber wie kann das sein?\nBei einem Produkt, das zu 75% aus Zucker besteht?\n@JuliaKloeckner @bmel\n\nWem, außer Nestle, soll das helfen?\n\n(Bilder von Nestle) https://t.co/3F1y2uFq6Y		773929423	Wer als Verbraucher nicht völlig verblödet ist, sollte merken, das der #Nutriscore keine Richtlinie für gesunde Ernährung sein kann. Andernfalls wären solche Produkte definitiv nicht mit A ausgezeichnet.\n@foodwatch_de https://t.co/fSIFrXsK1v		DE	Deutschland	Feature	7.02247	50.6325	7.2107	50.7744	city	e99b714fe65be4fb	Bonn	Bonn, Deutschland	218	241	https://t.co/fSIFrXsK1v	https://twitter.com/biesdorfer83/status/1414992517540597765/photo/1	pic.twitter.com/fSIFrXsK1v										204	217	foodwatch_de	42628622	71	82	Nutriscore					Twitter for iPhone
jsonDE1.csv	2021-07-19 20:03:15	Charlie Perelli	Gianluca, mi principito - La AKD - Músico - Poliglota - Viajero - Messianico	Community of Madrid, Spain	de	de	197750591	Es war auf einmal leer 🌝 https://t.co/gxfCqgWV0p		773929423	Erstmal 130g Nutriscore D reinknallen. 😋		DE	Deutschland	Feature	11.9973	54.0505	12.2929	54.2435	city	c1fb25bbd082d5f9	Rostock	Rostock, Deutschland																										Twitter for iPhone
jsonDE1.csv					de		8.62258e+17	Eis &amp; Pizza gibt's mit #NutriScore-Bestnote. Ist das die #gesündereWahl, von der @JuliaKloeckner spricht? Plus: Aktuell werden Bio-Lebensmittel und -Hersteller durch die neue Kennzeichnung diskriminiert. \n\nLassen Sie uns nachschärfen! ✍\n\nBÖLW-Position ➡ https://t.co/7gJI4DdETg https://t.co/WmsCAs5WfT	quoted																									entity	7.81975e+17	CPG		10	25	JuliaKloeckner	29858729
jsonDE1.csv		Christian Cordes	Founding Member CLUB OF HAMBURG Foundation. Corporate Affairs Leader. ➡️ Private Account & Views.	Hamburg	de		1.12135e+18	Der #NutriScore soll helfen, beim Einkauf innerh. einer Produktgruppe die ernährungsphys. günstigere Variante zu erkennen. So ist etwa ein Produkt mit grünem A die – mit Blick auf d Nährwert - bessere Wahl im Vergleich zu einem Produkt mit einem gelben C. https://t.co/59uqAOaT0n https://t.co/oUL2G7yVR8																																		41	52	Nutriscore
jsonDE1.csv					de		7.44965e+17	@MaggesStrehler @bmel @foodwatch_de Welche Studien bilden die Grundlage? Wie wird so etwas wie im vorliegenden Beispiel gehandhabt (Nahrungsmittel "roh" vs. Nahrungsmittel in seiner etablierten Zubereitungsform)?	replied_to																									entity	10046252390	Nesquik
jsonDE1.csv	2021-10-12 20:23:17	Based Dan	Was ist wirklich gesund?\n\nNahrung ist Information!\n\n**The plural of anecdote is data.** – Raymond Wolfinger \n\n***(Tweets sind keine medizinischen Ratschläge)***	Main-Taunus-Kreis, Hessen	es	es	1.27522e+18	@cariocadacasca @alfajorperdido ¿ Y viene sin etiquetas de exceso de azúcar ? Porque en Argentina quieren sacar la Ley de etiquetado	replied_to	9.01012e+17	Nutriscore:\nGauda = D\nCerealien = B\n🤡\nhttps://t.co/OZkY7U16oL		DE	Deutschland	Feature	8.50247	50.1154	8.56049	50.1509	city	7cfd8a6e63e3d769	Sulzbach (Taunus)	Sulzbach (Taunus), Deutschland	38	61	https://t.co/OZkY7U16oL	https://www.euronews.com/2021/10/12/roquefort-makers-feeling-blue-over-nutritional-scoring-system-that-defies-heritage	euronews.com/2021/10/12/roq…																					Twitter for Android
jsonDE1.csv					de		39509311	@boelwtermine @ErnaehrungF @bzfe_de @boelwtermine ...und Bio und Vollkorn schneiden in der selben Kategorie schlechter ab als konventionelles Weißbrot. 🙈 https://t.co/Lohaih3GE1	replied_to																													240	252	assosementi	8.41619e+17
jsonDE1.csv		Franco_tiradores	Escribo poesías		fr		1.01159e+18	@Aghantros Nutriscore C ça veut dire caca c'est ainsi	replied_to				DE	Deutschland	Feature	8.87446	51.6766	9.00002	51.8031	city	2fdbae9466f5c98e	Altenbeken	Altenbeken, Deutschland															28	43	alfajorperdido	7.46115e+17
jsonDE1.csv	2021-10-10 07:37:35	Hendrik Haase	🍴Redet & schreibt über‘s Essen in Zeiten digitalen & ökologischen Wandels 🤖🚜🌍 Baut Brücken von Acker bis Teller 🌁 Aktuelles Buch ➡️ https://t.co/fcYNXZGOmg	Berlin		de				39509311	Was frühstückt ihr so?\n\nDer #Nutriscore empfiehlt leckere XXL Burger Brötchen. 💚\n\nVoll mit lecker Natriumacetat, Ethylalkohol, Aroma, E300, E472e, E481 und als drittwichtigste Zutat Zucker. 🤢 https://t.co/O8aXBlXDyP		DE	Deutschland	Feature	13.3775	52.4837	13.3775	52.4837	poi	107a3422a517e001	REWE	REWE	192	215	https://t.co/O8aXBlXDyP	https://twitter.com/HendrikHse/status/1447073805747331072/photo/1	pic.twitter.com/O8aXBlXDyP														28	39	Nutriscore					Twitter for iPhone
jsonDE1.csv	2021-01-28 17:47:30					de				7.8119e+17	Neues aus unserem Institut für Lebensmittelqualität in Zusammenarbeit mit Paul M. Müller, München\n#paulmüller #nutriscore #floringmbh #marktbericht #lebensmittelqualität https://t.co/nSQKcyjC46													170	193	https://t.co/nSQKcyjC46	https://www.instagram.com/p/CKmIzW2HQ36/?igshid=1gvv0jpt30r8v	instagram.com/p/CKmIzW2HQ36/…														98	109	paulmüller		Point	6.51349	51.26703	Instagram
jsonDE1.csv	2021-07-07 19:41:54	Stefan mit "f" nicht "ph"	🚌 👨🏼‍✈️🏳️‍🌈| „Ich bin ein Berliner“, seit 1983|ehrgeizig|neugierig|Fotobegeistert| Sklave von #KaterFreddy	Lauchhammer, Deutschland		es				23578237	En #Alemania ya existe el #semaforonutricional que maravilla! #berlin #Nutriscore https://t.co/LkJi8Mzaxn		DE	Deutschland	Feature	8.42016	53.3951	10.3252	53.9647	city	5bcd72da50f0ee77	Hamburg	Hamburg, Deutschland	82	105	https://t.co/LkJi8Mzaxn	https://twitter.com/adriana_loreley/status/1412829240106668034/photo/1	pic.twitter.com/LkJi8Mzaxn														3	12	Alemania					Twitter for iPhone
jsonDE1.csv	2021-06-17 17:32:51	leonard 🏳️‍🌈	freelance debt creator | ex-Berliner | 21 ans | il/he | generation ouin-ouin	Paris, Frankreich		de				1.26486e+18	Eine "ausgewogene Trink Mahlzeit" von Food Lab, gesehen bei Edeka, Berlin. 500ml, 3.49€ + NutriScore A mit Zutatenliste Cold Brew Coffee👉THIS IS FOOD!\n\n#Ernährung #Lebensmittel #NutriScore #Verbraucher https://t.co/cb5uRj7S6E													202	225	https://t.co/cb5uRj7S6E	https://twitter.com/gansundgloria/status/1405549006122541063/photo/1	pic.twitter.com/cb5uRj7S6E						domain	65	Interests and Hobbies Vertical	Top level interests and hobbies groupings, like Food or Travel					152	162	Ernährung					Twitter for Android
jsonDE1.csv	2021-03-11 09:35:43					de				27459820	Betreutes Essen jetzt auch bei #ALDI mit #Nutriscore auf Eigenmarken. https://t.co/L6xeoe8nQ5 #ots													70	93	https://t.co/L6xeoe8nQ5	https://www.presseportal.de/pm/112096/4860838/?utm_source=twitter&utm_medium=social	presseportal.de/pm/112096/4860…														31	36	ALDI					Twitter for iPhone
jsonDE1.csv	2020-12-15 16:37:05					de				470071552	@Zakalaridis @MaggesStrehler @bmel @foodwatch_de Backofen oder Fritteuse?\nMit Mayo oder Ketchup?\nWie viel Mayo oder Ketchup?\nJeden Tag Pommes Schranke oder nur einmal im Monat?\nDer Nutriscore hat einfach seine Grenzen.\nEs gibt eigentlich keine ungesunden Lebensmittel, sondern nur eine ungesunde Ernährung.	replied_to																										0	12	Zakalaridis	7.44965e+17				7.44965e+17				Twitter for Android
jsonDE1.csv	2021-03-02 18:45:34	#OFFLINE 🥕🐰	#Möhralapostel #NazisRaus 🇪🇺 Für alle, die blind vor Liebe sind und deshalb mit dem Herzen sehen ❤️ L’essentiel est invisible pour les yeux.	Europe		de				572744427	@Yalanto1 @JuliaKloeckner @bmel Das hab ich heute auch bei Nesquik zum Frühstück gesehen. \nNutriscore B... Wtf... Damit du dich gut fühlst, wenn du den Kram deinen Kindern zum Frühstück hinstellst?? 🙄😠	replied_to																						domain	45	Brand Vertical	Top level entities that describe a Brands industry	0	9	Yalanto1	7.83238e+17				7.83238e+17				Twitter for Android
jsonDE1.csv	2021-02-05 19:28:41					de				2165057996	@scherzmut @CordMeier1 @LillyBlaudszun @Thorsten_Wehner Sie hat mit Nestle gesprochen, das ist ihr Job. Wer mit der Industrie nicht spricht, darf auch keine Veränderungen erwarten. Die Industrie wird in den nächsten Jahrzehnten unsere Ernährung mehr bestimmen als jeder Landwirt. Die Sinnhaftigkeit des Nutriscore darf man bezweifeln.	replied_to																						domain	45	Brand Vertical	Top level entities that describe a Brands industry	0	10	scherzmut	4622973081				4622973081				Twitter for iPhone
jsonDE1.csv	2021-02-05 19:37:59					de				2165057996	@scherzmut @CordMeier1 @LillyBlaudszun @Thorsten_Wehner Lesen hilft. Ein Beispiel 👇Genauer als jeder Nutriscore. https://t.co/80S39YLZad	replied_to												113	136	https://t.co/80S39YLZad	https://twitter.com/FriederikeKrick/status/1357760397428875266/photo/1	pic.twitter.com/80S39YLZad										0	10	scherzmut	4622973081				4622973081				Twitter for iPhone
jsonDE1.csv	2021-04-17 06:18:56	Herbert Dorfmann	Hier twittert Herbert Dorfmann, Mitglied des Europäischen Parlaments aus Südtirol.	Zwischen Südtirol und Brüssel		it				8.88691e+17	@rocketracoonrob Ohoh\nNutriScore E	replied_to																										0	16	rocketracoonrob	197750591				197750591				Twitter for Android
jsonDE1.csv	2021-02-17 13:17:06					es				143144775	@RamonRomanR @abcdesevilla Dado que eres un tipo inteligente, creo que buscas desinformar en lugar de estar mal informado. El Nutriscore es un medidor alimenticio europeo, que se basa en parámetros(comunistas por supuestos) preestablecidos.	replied_to																										0	12	RamonRomanR	259207561				259207561				Twitter for Android
jsonDE1.csv	2021-02-09 09:44:44	BZfE	Das Bundeszentrum für #Ernährung informiert rund ums #Essen. Neutral, wissenschaftlich fundiert und nah am Alltag. RT ≠ Zustimmung	Deutschland Bonn		de				8.62258e+17	@HendrikHse @ErnaehrungF @bzfe_de Yupp. Lesen Sie gern unsere Stellungnahme zum Thema #Nutriscore - da wird das auch bemerkt als verbesserungspunkt.	replied_to																										0	11	HendrikHse	39509311	86	97	Nutriscore	39509311				Twitter for iPhone
jsonDE1.csv	2021-06-21 14:15:39					fr				3392817371	@FondFade C'est un meilleur nutriscore que 80% de mon alimentation	replied_to																										0	9	FondFade	1.01159e+18				1.01159e+18				Twitter for Android
jsonDE1.csv	2021-02-09 08:24:15					de				8.62258e+17	@ErnaehrungF @bzfe_de Fragen sie 10 Leute, wie sie den #Nutriscore lesen. Wer denkt, dass nur Produkte innerhalb einer Kategorie verglichen werden, also 🍕 mit 🍕 oder 🍦 mit 🍦? Wahrscheinlich niemand. Nicht intuitiv. Man denkt: grün = gesund. Aber so ist es nicht. #nachbessern notwendig!	replied_to																										0	12	ErnaehrungF	1.12135e+18	55	66	Nutriscore	1.12135e+18				Twitter for iPhone
jsonDE1.csv	2021-01-14 14:47:12	Zakalaridis	il faut imaginer sisyphe heureux	Köln, Deutschland		de				1.26486e+18	@boelwtermine @JuliaKloeckner Der Trick ist, dass der #NutriScore nur die Bewertung im Vergleich innerhalb! der Produktgruppe! wiedergibt! Hier also innerhalb der Produktgruppe Pizza, ect. \nDer NutriScore hat nichts mit den Empfehlungen der #DGE zutun. Völlig irreführend, die Formulierungen von #Klöckner.	replied_to																						domain	30	Entities [Entity Service]	Entity Service top level domain, every item that is in Entity Service should be in this domain	14	29	JuliaKloeckner	29858729	54	65	NutriScore	8.62258e+17				Twitter for Android
jsonDE1.csv	2020-12-29 12:03:14					de				2165057996	@boelwtermine @joycemoewius Der NutriScore musste mit viel Druck und Getöse eingeführt werden. Der Sinn erschließt sich nicht. Wieder mal ein „Label“ zu viel.	replied_to																										14	27	joycemoewius	889456394				8.62258e+17				Twitter for iPhone
jsonDE1.csv	2021-07-07 19:03:01	Marion Linnemann	Natürliche Person, \nZitat: lebt von Hartz 4 (Unterhalt nach dem SGB II)\n\nhttps://t.co/z0v7kAvYEr\nhttps://t.co/6rSWKiDuBY\n\nBerufsausweis: Diplomurkunde	Bad Driburg, Deutschland		und				1.1048e+18	#nutriscore https://t.co/Cvwm3CVrzH	quoted												12	35	https://t.co/Cvwm3CVrzH	https://twitter.com/MarionLinnemann/status/1412083319651590144	twitter.com/MarionLinneman…														0	11	nutriscore					Twitter for Android
jsonDE1.csv	2021-04-03 14:47:15	EU Food Safety	We are ensuring Safe Food 🍏, Animal Welfare 🐮 & Plant Health 🌱 within the 🇪🇺 through coherent #EUFarm2Fork measures	Brussels		en				2840574203	"It has become clear throughout Europe that one of the ways of meeting the challenges of reducing pesticide products is to have more resistant plants through genetic improvement", says @HerbertDorfmann #plantbreeding @Food_EU @COPACOGECA @assosementi https://t.co/ej7eNTUaEs													253	276	https://t.co/ej7eNTUaEs	https://www.euractiv.com/section/agriculture-food/news/mep-labelling-of-gene-edited-foodstuffs-is-impossible/	euractiv.com/section/agricu…	32	37	0.9649	Place	Europe					185	201	HerbertDorfmann	479390782	202	216	plantbreeding					Twitter for Android
jsonDE1.csv													DE	Deutschland	Feature	6.41306	51.2226	6.62586	51.2999	city	ce4c497bcac8dfa0	Willich	Willich, Deutschland																			62	69	berlin
jsonDE1.csv																								202	225	https://t.co/cb5uRj7S6E	https://twitter.com/gansundgloria/status/1405549006122541063/photo/1	pic.twitter.com/cb5uRj7S6E						entity	8.34828e+17	Drinks	Drinks					189	201	Verbraucher
jsonDE1.csv																																		domain	66	Interests and Hobbies Category	A grouping of interests and hobbies entities, like Novelty Food or Destinations
jsonDE1.csv																																		entity	8.34828e+17	Generic Drinks	Generic Drinks
jsonDE1.csv																																		domain	67	Interests and Hobbies	Interests, opinions, and behaviors of individuals, groups, or cultures; like Speciality Cooking or Theme Parks
jsonDE1.csv																																		entity	8.50443e+17	Coffee	Coffee
jsonDE1.csv																																		domain	65	Interests and Hobbies Vertical	Top level interests and hobbies groupings, like Food or Travel
jsonDE1.csv																																		entity	8.34828e+17	Drinks	Drinks
jsonDE1.csv																																		entity	8.34828e+17	Generic Drinks	Generic Drinks
jsonDE1.csv																																		domain	47	Brand	Brands and Companies
jsonDE1.csv																																		domain	66	Interests and Hobbies Category	A grouping of interests and hobbies entities, like Novelty Food or Destinations
jsonDE1.csv																																		domain	67	Interests and Hobbies	Interests, opinions, and behaviors of individuals, groups, or cultures; like Speciality Cooking or Theme Parks
jsonDE1.csv																																		entity	8.50419e+17	Milk	Milk
jsonDE1.csv																																		domain	46	Brand Category	Categories within Brand Verticals that narrow down the scope of Brands
jsonDE1.csv																																		entity	7.81975e+17	Beverage
jsonDE1.csv																																		domain	47	Brand	Brands and Companies
jsonDE1.csv																																						13	26	abcdesevilla	42590652
jsonDE1.csv																																						12	24	ErnaehrungF	1.12135e+18
jsonDE1.csv																																						13	21	bzfe_de	22252511	263	275	nachbessern
jsonDE1.csv																																		entity	7.81975e+17	CPG		11	22	CordMeier1	7.04657e+17
jsonDE1.csv																																		domain	46	Brand Category	Categories within Brand Verticals that narrow down the scope of Brands	23	38	LillyBlaudszun	8.24728e+17
jsonDE1.csv																																		entity	7.81975e+17	Candy/Gum		39	55	Thorsten_Wehner	88125543
jsonDE1.csv																																		domain	47	Brand	Brands and Companies
jsonDE1.csv																																										110	121	nutriscore
jsonDE1.csv																																										122	133	floringmbh
jsonDE1.csv																																										134	147	marktbericht
jsonDE1.csv																																										148	169	lebensmittelqualität
jsonDE1.csv																																		domain	30	Entities [Entity Service]	Entity Service top level domain, every item that is in Entity Service should be in this domain					296	305	Klöckner
jsonDE1.csv																																		entity	8.25049e+17	Pizza	Pizza
jsonDE1.csv																																		domain	30	Entities [Entity Service]	Entity Service top level domain, every item that is in Entity Service should be in this domain
jsonDE1.csv																																		entity	8.24777e+17	Generic Food	Generic Food
jsonDE1.csv																																		domain	30	Entities [Entity Service]	Entity Service top level domain, every item that is in Entity Service should be in this domain
jsonDE1.csv																																		entity	8.25049e+17	Pizza	Pizza
jsonDE1.csv																																						13	28	MaggesStrehler	1197001962
jsonDE1.csv																																						29	34	bmel	322697372
jsonDE1.csv																																						35	48	foodwatch_de	42628622
jsonDE1.csv		ABC de Sevilla	#Noticias #Sevillahoy, #Andalucía, #España \nFacebook: https://t.co/NoX1SLnjUk Instagram: https://t.co/AygguKu5o0	Sevilla																														entity	8.34828e+17	Drinks	Drinks
jsonDE1.csv		Adriana Höfer	Vive y deja vivir... sobretodo mi vida :) live your life and let me live mine, leben und Leben lassen insbesondere mein Leben.. Troll serás bloqueado	Berlin, Alemania									DE	Deutschland	Feature	7.40969	52.4383	7.50109	52.5018	city	b285015ead5a48dd	Messingen	Messingen, Deutschland																			70	81	Nutriscore
jsonDE1.csv		Bernhard Barkmann 👨‍🌾	- #Agraraktivist\n- kleinbäuerlicher Massentierhalter aus dem #Emsland\n- #Agrarblogger\n- # Mitbegründer von @AgChatDE\n- #Graswurzler #grüneKreuze	Messingen, Deutschland																														entity	10046158484	Nestle USA
jsonDE1.csv		BMEL	Bundesministerium für #Ernährung und #Landwirtschaft	Bonn / Berlin																														entity	7.81975e+17	Beverage
jsonDE1.csv		Bund Ökologische Lebensmittelwirtschaft (BÖLW)	Der BÖLW ist der Spitzenverband deutscher Erzeugerinnen, Hersteller und Händlerinnen von Bio-Lebensmitteln. Es twittern die Öffies.	Berlin, Deutschland																														domain	45	Brand Vertical	Top level entities that describe a Brands industry
jsonDE1.csv		COPA-COGECA	Copa-Cogeca is the united voice of farmers and agri-cooperatives in the EU, representing 22 million farmers, pressing for a strong agriculture sector.#WeFarm4EU	Bruxelles																																		219	227	Food_EU	2874880006
jsonDE1.csv		Cord Meier🐖🐂🌱🚜🌽🌲🌳🌾	Landwirt, für ein Miteinander der Menschen und gegen Rechtsradikalismus	Niedersachsen, LK Schaumburg																																		23	38	LillyBlaudszun	8.24728e+17
jsonDE1.csv		Daniela Marx, 323ppm	Für mehr #Landwirtschaft in Kitas mitten in der Stadt! \n#Klimawandel #Ernährung #Agrarwende #Politik #Naturschutz #Umweltschutz #Bildung	Berlin																				202	225	https://t.co/cb5uRj7S6E	https://twitter.com/gansundgloria/status/1405549006122541063/photo/1	pic.twitter.com/cb5uRj7S6E						domain	65	Interests and Hobbies Vertical	Top level interests and hobbies groupings, like Food or Travel					177	188	NutriScore
jsonDE1.csv		Das Orakel vom Delphin	Hauskerl und Co-Gründer von https://t.co/aYTiRUpmCF. Auch bekannt als: Marc Strehler																															entity	8.24777e+17	Generic Food	Generic Food					241	245	DGE
jsonDE1.csv		Ernaehrung im Fokus	Die #Fachzeitschrift des @bzfe_de für Ernährungsprofis. Hier twittert die Online-Redaktion. Impressum: https://t.co/gEn6E9Ncyr #Ernährung #Esskultur #Wissenschaft	Bonn, Deutschland																														entity	7.81975e+17	CPG
jsonDE1.csv		Florin GmbH	Gegründet im Jahr 1973, kann unsere Firma auf eine über 40-jährige erfolgreiche Zusammenarbeit mit unseren Kunden und Lieferpartnern zurückblicken.	Willich, Deutschland																														entity	10024011447	Nestle
jsonDE1.csv		foodwatch Deutschland	Die unabhängige Verbraucherorganisation – Es twittern Sarah Häuser, Dario Sarmadi, Andreas Winkler und Susanne Gonswa (Impressum und Datenschutz: https://t.co/YrlD8QYbUu).	Berlin, Germany									DE	Deutschland	Feature	7.48265	50.2829	7.69637	50.4097	city	dadb4c69bccf257f	Koblenz	Koblenz, Deutschland																			26	46	semaforonutricional
jsonDE1.csv		Friederike Krick 🥕🥔 🐸 🪶 💐	Der Landwirtschaft zutiefst verbunden. Inhaberin agrar-press. Möhren sind systemrelevant. #Dorfkind #Stadtkind #Faktenlobby #FDP	Koblenz, Deutschland																																		25	33	bzfe_de	22252511
jsonDE1.csv		Herzmut	There is an app for every problem, but not always a solution. \ner/sein | INTP-T | 💉 2/3 | 🐢	Berlin, Deutschland																																		11	22	CordMeier1	7.04657e+17
jsonDE1.csv		JoyMoe	watching farming, food processing, trading, policy making....birds and sports. views are my own, retweets not always my opinion. press officer @bioverband_de	Berlin																														domain	48	Product	Products created by Brands. Examples: Ford Explorer, Apple iPhone.
jsonDE1.csv		Julia Klöckner	Mitglied des Deutschen Bundestages, Bundesministerin für Ernährung und Landwirtschaft (kom.), Landesvorsitzende CDU Rheinland-Pfalz, stv. CDU-Bundesvorsitzende																															domain	46	Brand Category	Categories within Brand Verticals that narrow down the scope of Brands	26	31	bmel	322697372
jsonDE1.csv		Marina Mata Nope	Panie i panowie, mam kwiaty w mój tyłek. // 16 años en 🇦🇷, 16 años en Galicia🤍💙🤍 y ahora en 🇩🇪										DE	Deutschland	Feature	13.0883	52.3381	13.7609	52.6753	city	3078869807f9dd36	Berlin	Berlin, Deutschland															12	27	cariocadacasca	267261661
jsonDE1.csv		MuesliDD	she/her																																							94	98	ots
jsonDE1.csv		Ñïçø ඞ	Rostock ⚓ | Lvl. 2️⃣0️⃣ + 1️⃣ | Elektrofachkraft ⚡| Aktiv an der ✨ Energiewende ✨ beteiligt | 🏳️‍🌈 https://t.co/r1DtTmq1Nt	Hansestadt Rostock																														domain	66	Interests and Hobbies Category	A grouping of interests and hobbies entities, like Novelty Food or Destinations
jsonDE1.csv		Petra Jorasch	Supporting Plant Breeding Innovation, Biologist, enthusiastic about photography and nature - working for Euroseeds, but opinions are my own	Brüssel, BE & Bonn DE																														entity	8.50443e+17	Coffee	Coffee
jsonDE1.csv		Race dep	Ask for Kwiss\n.\nil. he. هو\n.\nLisez @PdRevue\n.\nThread Maudit\n.\nLigue du Zbeul\n.\nHétérophobe\n.\nVotre pédale rabat-joie\n.\nToustes les queers sont mes adelphes\n.	La-Queer-en-Brie																				202	225	https://t.co/cb5uRj7S6E	https://twitter.com/gansundgloria/status/1405549006122541063/photo/1	pic.twitter.com/cb5uRj7S6E						entity	8.25048e+17	Food	Food					163	176	Lebensmittel
jsonDE1.csv		Ramón Román		Sevilla																														domain	65	Interests and Hobbies Vertical	Top level interests and hobbies groupings, like Food or Travel
jsonDE1.csv		robin	he/him | 🏳️‍🌈 | yep that's me in the picture, why do you ask?	 & NRW																														domain	67	Interests and Hobbies	Interests, opinions, and behaviors of individuals, groups, or cultures; like Speciality Cooking or Theme Parks
jsonDE1.csv		Thorsten Wehner	Sozialdemokrat mit Hang zur #Agrarpolitik. War 2006-2016 MdL RheinlandPfalz #PublicAffairs / #PolitischeKommunikation #ErneuerbareEnergien #Westerwald #Mainz 42	Wissen (Sieg) 🇪🇺🇩🇪																																		39	55	Thorsten_Wehner	88125543
jsonDE1.csv		ЯOⓂ∀N Ⓜ∀RIN G∀RCI∀	ich bin ein Berliner.	Sevilla																														entity	10046252390	Nesquik
jsonDE2.csv	2020-11-06 06:56:50				de	de	42628622	ZDF-@Frontal21 über die butterweiche Freiwilligkeits-Politik von @JuliaKloeckner und darüber, wie ihr Ministerium eine wissenschaftliche Studie zur Ampel-Kennzeichnung umschreiben ließ https://t.co/8pt2z1cF7e #NutriScore #Lobbyismus		29326850	Die freiwillige Lebensmittel-Ampel ist in Deutschland da ... Ob sich die durchsetzen kann?\n\n#NutriScore #Lebendmittelampel \n\nhttps://t.co/5FnpQ4MYWL		DE	Deutschland	Feature	8.55573	50.5264	8.76449	50.6353	city	0b11851422a811fd	Gießen	Gießen, Deutschland	125	148	https://t.co/5FnpQ4MYWL	https://www.24hamburg.de/wirtschaft/nutri-score-startet-offiziell-zr-90090823.html	24hamburg.de/wirtschaft/nut…														92	103	NutriScore					Twitter for iPhone
jsonDE2.csv		JunkFoodGuru	Get inspired every Day and keep your eyes open!	Hamburg	de		1425265488	Wir brauchen kein Durcheinander an Verbraucherbefragungen, sondern einheitliche u. verständliche #Nährwertkennzeichnung auf Fertiglebensmitteln. NutriScore hat sich erfolgreich bewährt. JA zum #NutriScore!\nhttps://t.co/pGhUlG0mDt @Klaus_Mueller @foodwatch_de @dpa @GrueneBundestag																236	259	https://t.co/06tXv3xGYz	https://twitter.com/Leodietista/status/1229512482789691392/photo/1	pic.twitter.com/06tXv3xGYz														146	157	etiquetado
jsonDE2.csv		Matthias van der Donk	human beeing, husband, father of two / Interest in politics / views my own, RT not always endorsement	Rheinberg, Deutschland	de		1671248730	Nutriscore: Gut, wenn man den Algorithmus kontrollieren kann, sagt @JGurkmann @vzbv. Jedoch: Nutriscore ist ein Modell und eine Marke des französischen Staats. Mitspracherecht fraglich. #kostbar https://t.co/wXU2Qi9CT0																										entity	7.81975e+17	Candy/Gum
jsonDE2.csv		foodwatch Deutschland	Die unabhängige Verbraucherorganisation – Es twittern Sarah Häuser, Dario Sarmadi, Andreas Winkler und Susanne Gonswa (Impressum und Datenschutz: https://t.co/YrlD8QYbUu).	Berlin, Germany	de		1425265488	Nun ist klar: #Verbraucher wollen #Nutriscore. Jetzt also los! Hoffentlich blockiert @cducsubt das nicht wieder. #Verbraucher haben das #RechtzuWissen. Am besten jetzt #EU Initiative , damit wir einheitliches Zeichen im Binnenmarkt bekommen. @Die_Gruenen @vzbv @foodwatch_de																										entity	8.25049e+17	Pizza	Pizza
jsonDE2.csv	2020-06-25 17:43:02				de	de	322697372	Morgen, Mittwoch, ab 13.15 Uhr im Livestream 📺:\n\nAb 13:15 Uhr stellt BMin @JuliaKloeckner in einer PK mit dem @DLTonline zunächst unsere neue Sonderförderung zur #Lebensmittel|versorgung auf dem Land vor.\n\nAnschließend berichtet sie vom 2. Runden Tisch #Insektenschutz. https://t.co/V5FCQDO31L		9.83319e+17	@Hilka1Hilka @foodwatch_de Deutschland kann sich an #Großbritannien eine Scheibe abschneiden. #NutriScore und #Zuckersteuer.	replied_to	DE	Deutschland	Feature	8.49643	50.2014	8.71252	50.2743	city	5105bbdcca441271	Bad Homburg vor der Höhe	Bad Homburg vor der Höhe, Deutschland															0	12	Hilka1Hilka	8.11187e+17	52	67	Großbritannien	8.11187e+17				Twitter for Android
jsonDE2.csv		Nestlé Deutschland	Hier gibt es aktuelle Neuigkeiten von Nestlé. Außerdem sprechen wir über Themen, die uns wichtig sind, wie z.B. eine nachhaltigere Lebensmittelproduktion.	Frankfurt am Main	de		42628622	Luise Molling v foodwatch: Gut, dass der #Nutriscore endlich kommt, aber jetzt geht’s erst richtig los: Die Hersteller müssen ihre Produkte mit der verbraucherfreundlichen #Lebensmittelampel kennzeichnen! https://t.co/BLWU4rJEEL																										domain	30	Entities [Entity Service]	Entity Service top level domain, every item that is in Entity Service should be in this domain
jsonDE2.csv		Roland Hartl	Blogger - Gamer - Tribut - Sailor Moon Otaku - ( ローランド ハーテル ) - ( 美少女戦士セーラームーン, 愛している )	Germany	de		17965092	Lebensmittelkennzeichnung: Klöckner gibt Widerstand gegen Nutri-Score auf https://t.co/eKxUsjtlK6 https://t.co/Z6kQ4DrMZS																										domain	30	Entities [Entity Service]	Entity Service top level domain, every item that is in Entity Service should be in this domain
jsonDE2.csv					en		2893273911	Italian government notified its '#NutrInformBattery' label to @Food_EU https://t.co/e96jmnx5as to counter momentum for #NutriScore.\nYet scheme is confusing and counter-intuitive: highly charged batteries may be wrongly interpreted as a goal to achieve! Not helpful. #FarmToFork https://t.co/TpYmmOUgcl					DE	Deutschland	Feature	9.35025	51.2604	9.56985	51.3689	city	2d03e3c8e578c744	Kassel	Kassel, Deutschland																			110	123	Zuckersteuer
jsonDE2.csv					en		1186	I think I solved the Senate Commerce Committee's problem w/r/t "Technology Companies and Algorithms".\n\nRef. https://t.co/9eo9sa6Xxu https://t.co/18N5UfcJoQ																										domain	30	Entities [Entity Service]	Entity Service top level domain, every item that is in Entity Service should be in this domain
jsonDE2.csv		Dr. Stefanie Gerlach		Schwäbisch-Gmünd, Deutschland	de		1172282724	Gutes aufgreifen und Positionen verbinden - das soll der\nEntwurf des #MRI für ein Nährwertkennzeichnungs-Modell - den fachlichen\nHintergrund und eine ausführliche Beschreibung finden Sie hier: https://t.co/LTlXyMLKil #Nährwertkennzeichnung https://t.co/tfcWCvjC1t																										domain	45	Brand Vertical	Top level entities that describe a Brands industry
jsonDE2.csv					de		4333836561	Es gibt genug freie Flächen für Baumpflanzungen. Wir brauchen 3 Billionen Bäume um den Klimawandel vielleicht stoppen zu können. \nJeder Mensch sollte Bäume pflanzen, jeder Staat sollte große Flächen ausweisen wo man wieder aufforsten kann. Wir sollten diese Chance wahrnehmen. https://t.co/SkYU6jYTmy																										entity	8.24777e+17	Generic Food	Generic Food					172	183	nutriscore
jsonDE2.csv		Tonka u ihr 💉💉Leckerli-Service	😤Motzig😤gegen AfDNazis,Querdenker u Impfgegner😤\n🌻⚘🍀🐝🐦🐿Kätzle\n💕 Moinchen\n\nSeit Juni 2020 hier aktiv 💃🎶🥁	Freiburg im Breisgau, Deutschl	de		488614084	Ernährungsministerin Klöckners Entscheidung für die #Nutriscore-Lebensmittel-Kennzeichnung ist richtig, ist aber nur ein kleiner Schritt - und kommt sehr spät. https://t.co/LMfsH0Dpbk																										domain	30	Entities [Entity Service]	Entity Service top level domain, every item that is in Entity Service should be in this domain
jsonDE2.csv	2020-06-23 21:40:33				de	de	57641158	Einführung des #Nutriscore (Lebensmittelkennzeichnung) hilft Verbrauchern, ersetzt nicht die Eigenverantwortung, lässt notwendige Entscheidungsfreiheit. @JuliaKloeckner überzeugt Parteitag von Einführung, der auf wissenschaftliche Analysen und Bürgerbefragung beruht. #cdubpt19 https://t.co/MPZpY8OBbY		56044969	@bmel @JuliaKloeckner @DLTonline Dann können Sie ja erläutern, warum der #NutriScore nicht verpflichtet wird? Welche Lobby steckt dahinter? Welche Gelder sind geflossen, um diesen Score zu verhindern? Ungesunde Ernährung kostet 100.000 Menschenleben in der EU und sie setzen auf Freiwilligkeit - zum Wohle??	replied_to																										0	5	bmel	322697372	73	84	NutriScore	322697372				Twitter for Android
jsonDE2.csv	2020-02-17 22:06:33				de	es	132301982	Der Gemüsekonservenhersteller HAK führt den #NutriScore nach Belgien und den Niederlanden ab sofort auch in Deutschland ein - nach und nach auf allen Produkten. ($) https://t.co/QqYzAQRiRk	quoted	318379701	Te importa lo que comes ? Haz como yo, firma esta peticion para que el Nutriscore sea obligatorio en Europa ! https://t.co/kYip1OrNhA\n#Nutriscore #etiquetado #diätassistent #Ernährungsberater #Lebensmittel #Essen #dietistanutricionista https://t.co/06tXv3xGYz													110	133	https://t.co/kYip1OrNhA	http://www.pronutriscore.org	pronutriscore.org														134	145	Nutriscore					Twitter for Android
jsonDE2.csv					en		22243473	Controversial question: if we need to accept hormone &amp; chlorine chicken to secure a US trade deal, which is a massive priority, could we not just agree that they would have to be clearly labelled and sold in a separate area of the market, like how in the US organic food is sold?					DE	Deutschland	Feature	5.97485	50.6621	6.21811	50.8572	city	8b5c39218ec8bdee	Aachen	Aachen, Deutschland															12	26	frauhasenklee	1.07502e+18
jsonDE2.csv	2020-03-09 12:03:51	Nick Ward	CEO of @suppinmindscot 💪🏼, Trustee @lgbthealthy🏳️‍🌈 former director @autismscotland teacher & Cllr 🙋🏼‍♂️, runner🏃‍♂️Sci Fi & history geek 🤓🚀he/him.	Edinburgh, Scotland	de	de	322697372	BMin @JuliaKloeckner gibt Ergebnisse der repräsentativen Verbraucherforschung bekannt: Mehrheit der befragten Verbraucher votiert für Nutriscore. Das System wird – trotz einiger Mängel – am besten verstanden.\n\nInfos ⇨ https://t.co/FSsBuNh1qo\n\n#gesundeErnährung\n\nErklärfilm 📺 ⬇ https://t.co/iOcqqdXAnB		15249191	Pizza Salami, Mozzarella, Speciale oder Vegetaria? Nur eine der 4 Pizzen hat es gestern in meinen Backofen geschafft. 😅👏🏻Kannst du die Sorte erraten? 🤔✨Werbung unbezahlt✨ Ansonsten gibt es wegen dem neuen Nutriscore… https://t.co/XTg2kXKRQU													217	240	https://t.co/XTg2kXKRQU	https://www.instagram.com/p/B9grH0ygYj4/?igshid=30dpecrcv5bo	instagram.com/p/B9grH0ygYj4/…						domain	65	Interests and Hobbies Vertical	Top level interests and hobbies groupings, like Food or Travel									Point	10.0014	53.55	Instagram
jsonDE2.csv					en		2333109386	@RenateKuenast @Klaus_Mueller @foodwatch_de @dpa @GrueneBundestag This kind of test requires very rigorous scientific methodology: randomization of several supermarkets; one logo tested/supermarket; all logos tested on same products in each supermarket; a control group.... And 16 products tested will not permit a sufficient statiscal power !	replied_to																																	206	212	Essen
jsonDE2.csv					de		1671248730	@julia_marg @vzbv Inhaltliche Kritik als Strategie abzutun, so macht man es sich einfach. Für alle anderen: \nhttps://t.co/7uWGtDI8eU	replied_to																									domain	48	Product	Products created by Brands. Examples: Ford Explorer, Apple iPhone.
jsonDE2.csv					de		8.11187e+17	@foodwatch_de .... bitte beides: Zuckersteuer und Nutriscore! 👍	replied_to				DE	Deutschland	Feature	6.80649	51.3508	6.95953	51.4714	city	b8b509d6bb336b76	Mülheim an der Ruhr	Mülheim an der Ruhr, Deutschland																			91	102	Ernaehrung
jsonDE2.csv					de		290812058	@bu22dee @zeitonline Bitte, wenn du das sagst...	replied_to																									domain	30	Entities [Entity Service]	Entity Service top level domain, every item that is in Entity Service should be in this domain
jsonDE2.csv	2020-11-24 19:10:57	Friederike Krick 🥕🥔 🐸 🪶 💐	Der Landwirtschaft zutiefst verbunden. Inhaberin agrar-press. Möhren sind systemrelevant. #Dorfkind #Stadtkind #Faktenlobby #FDP	Koblenz, Deutschland	de	de	1.20158e+18	@bmel Braucht halt einfach kein Mensch 🙄	replied_to	2165057996	@zen_garten @frauhasenklee @BlogAgrar Der Labeldschungel ist eine Katastrophe. Und es kommt immer wieder was Neues dazu wie jetzt der Nutriscore.	replied_to	DE	Deutschland	Feature	7.48265	50.2829	7.69637	50.4097	city	dadb4c69bccf257f	Koblenz	Koblenz, Deutschland															0	11	zen_garten	2428765073				2428765073				Twitter for iPhone
jsonDE2.csv	2020-08-21 20:44:02				de	de	56044969	@bmel @JuliaKloeckner @DLTonline Dann können Sie ja erläutern, warum der #NutriScore nicht verpflichtet wird? Welche Lobby steckt dahinter? Welche Gelder sind geflossen, um diesen Score zu verhindern? Ungesunde Ernährung kostet 100.000 Menschenleben in der EU und sie setzen auf Freiwilligkeit - zum Wohle??	replied_to	1.26486e+18	@agropolit @bmel Das Verrechnen! der verschiedenen Zutaten miteinander! ergibt dann zusammengefasst! den NutriScore als Mittelwert. Und genau da liegt das Schlupfloch für die Lebensmittelindustrie.\nAuch findet die Bewertung einzelner Inhaltsstoffe ohne ihren Kontext statt. Siehe Olivenöl.	replied_to	DE	Deutschland	Feature	8.14284	49.8956	8.34306	50.0354	admin	7d6486f30ebbd63d	Mainz	Mainz, Rheinland-Pfalz															0	10	agropolit	1.20158e+18				1.20158e+18				Twitter for Android
jsonDE2.csv		RND	Exklusive News, interessante Hintergründe und fundierte Meinungen. Hier twittert das RedaktionsNetzwerk Deutschland (RND).	Hannover	de		15094783	... Das Ergebis ist verblüffend: Eine scheinheilige (da ist das Wort wieder) Allianz zwischen ministeriellem Zwerg und industriellem Riesen. Wobei sie ihn anhimmelt als bestünde er aus 1 Mio. Stück Würfelzucker: Zum Glück sieht er nur süß aus und ist nicht fett. Sonst würde ...	replied_to				DE	Deutschland	Feature	13.5005	52.4795	13.5005	52.4795	poi	09529d415216e000	Funkhaus Berlin	Funkhaus Berlin											domain	46	Brand Category	Categories within Brand Verticals that narrow down the scope of Brands	25	40	JuliaKloeckner	29858729	188	197	Klöckner
jsonDE2.csv					de		29858729	... aber nur etwa 9 Prozent unseres Haushaltseinkommens geben wir Verbraucher im Schnitt für die Lebensmittel aus, die in den teuren Küchen zubereitet werden ... https://t.co/b1mMHcC1DM	quoted																									domain	46	Brand Category	Categories within Brand Verticals that narrow down the scope of Brands
jsonDE2.csv	2020-06-23 21:42:16	Rosenburg Ⓥ 🌹🏰🏳️‍🌈☠️	A human. Being	Hamburg-Berlin-WestWien	de	de	22252511	#Tabuwörter in der #Ernährungsbildung: Zeitgemäß kommunizieren! Gibt es richtige und falsche #Ernährung? Und was ist eigentlich gesund? Warum bestimmte Begriffe ausgedient haben, wenn wir übers #Essen und #Trinken reden ➡️ https://t.co/KWRwRF7O20 #Ernährungskommunikation https://t.co/LESErCiNrh		56044969	@bmel @JuliaKloeckner @DLTonline Liegt es eventuell an Nestlé? Wie steht @NestleGermany zum Nutriscore? Wird #Nestle den Score auf alle ihre Lebensmittel drauf drucken oder eher nicht, weil? Gründe? #NutriScore	replied_to																						domain	45	Brand Vertical	Top level entities that describe a Brands industry	0	5	bmel	322697372	109	116	Nestle	56044969				Twitter for Android
jsonDE2.csv		BMEL	Bundesministerium für #Ernährung und #Landwirtschaft	Bonn / Berlin	de		322697372	#Nährwertkennzeichnung mit #NutriScore bietet Verbrauchern mehr Orientierung beim Einkauf - #gesundeErnährung wird damit einfacher.\n\nBMin @JuliaKloeckner fasst es so zusammen 📺 ⬇\n\nAntworten auf Ihre Fragen gibt es auch in unseren FAQs ⇨ https://t.co/xcoQaiUkYl https://t.co/CZetmPrUjM																														22	32	DLTonline	3524459475
jsonDE2.csv	2020-11-06 07:01:15					de				29326850	Wird sich der #NutriScore (#LebensmittelAmpel) in #Deutschland durchsetzen?\n\n#Lebensmittel #Ernaehrung		DE	Deutschland	Feature	6.53368	51.5036	6.70031	51.6247	city	8ca53de014b75b1f	Rheinberg	Rheinberg, Deutschland																			14	25	NutriScore					Twitter for iPhone
jsonDE2.csv	2019-10-02 08:23:27	Sabine Bonneck	Observer of the global food system. Critical and independent. #s4f	Köln, Deutschland		de				27459820	Wie entsorgt man eigentlich große Mengen an bevorratendem italienischen #Ölivenöl sachgerecht. 🤔 #Nutriscore #BetreutesEssen https://t.co/DipftV6j6J	quoted												125	148	https://t.co/DipftV6j6J	https://twitter.com/bmel/status/1178628804757069827	twitter.com/bmel/status/11…														72	81	Ölivenöl					Twitter for iPhone
jsonDE2.csv	2019-05-15 14:11:07					de				9.83319e+17	Wer ein gesundes leckeres #Essen zaubern möchte, benötigt funktionierende #Küchengeräte. #Lebensmittel die ohne #Pestizide hergestellt sind.\n\n@JuliaKloeckner\n@RenateKuenast\n@Deprifrei\n@foodoase\n@foodwatch_de\n@issgesund\n@LZnetNEWS\n@FoodsharingDE\n#NutriScore\n#Rastatt\n#BadenBaden https://t.co/uH2ALGegIs	quoted												278	301	https://t.co/uH2ALGegIs	https://twitter.com/JuliaKloeckner/status/1128625600321732608	twitter.com/JuliaKloeckner…										142	157	JuliaKloeckner	29858729	26	32	Essen					Twitter for Android
jsonDE2.csv	2019-10-01 08:24:46	Marcel Weigand	Leiter Kooperation & #digitaleTransformation der @UPD_Beratung #Digitalisierung #digitaleGesundheitskompetenz #eHealth #ePA #DiGA #Patientenorientierung	Berlin, Deutschland		de				50619670	Welcher #Lebensmittel-Hersteller kennzeichnet sein Produkt eigentlich freiwillig mit rot im Sinne von: Schädlich für den Menschen? Frage für einen Freund, der #Nutriscore im Grunde gar nicht so schlecht findet																															8	21	Lebensmittel					Twitter for iPhone
jsonDE2.csv	2020-11-10 07:50:40					de				2383487173	Warum unser Gehirn Zucker und Fett so liebt, wieso Fleisch furchtbar fürs Klima ist und was Gesundheit mit #Nachhaltigkeit zu tun hat, darüber spricht Stefan Schaltegger im Interview mit dem @RND_de #nutriscore https://t.co/C5gN7yENUK		DE	Deutschland	Feature	11.6015	48.1382	11.6015	48.1382	poi	0fc346d47b542000	Klinikum rechts der Isar	Klinikum rechts der Isar	211	234	https://t.co/C5gN7yENUK	https://www.rnd.de/gesundheit/forscher-erklart-warum-wir-labels-wie-den-nutri-score-brauchen-4NVM65PVYBGG5FWBHXXD4WVKAQ.html	rnd.de/gesundheit/for…										191	198	RND_de	2885573171	107	122	Nachhaltigkeit					Twitter for iPhone
jsonDE2.csv	2019-10-24 19:31:29	Karol ¯\_(ツ)_/¯	Gescheiterter Autor, erfolgreicher Trinker	Düsseldorf		de				216728843	Unsere 9. #DiabetesGala beginnt! Vorstandsvorsitzender Dr. Kröger mahnt im Gespräch mit #InkaBause die Umsetzung der Nationalen Diabetesstrategie an und freut sich über den #Nutriscore https://t.co/Mxn3aneBez													185	208	https://t.co/Mxn3aneBez	https://twitter.com/diabetesDE/status/1187421365684658176/photo/1	pic.twitter.com/Mxn3aneBez														10	23	DiabetesGala					Twitter for Android
jsonDE2.csv	2019-09-30 18:44:48					de				932867124	Und mein Kühlschrank dann ab 2020; \n\nEEEEEEEEEEEEEEEEEEEEEDEEEEEEEEEEEDEEEEEEECEEEEEECEEEEEEEEEEEDEEEEEEEEEEEEEEEEEEEEEEEEEEEDDDDEEEEEEECCEEEEEEEEEEEEEEEEEEEEEEEEEEEEEEEEEEEEEEEEEEEEEEEDEEEEEEEEEEEDEEEEEEECEEEEEECEEEEEEEEEEEDEEEEEEEEEEEEEEEEEEEEEEEEEEEDDDDEEEEEEECC\n\n#Nutriscore																															267	278	Nutriscore					Twitter for Android
jsonDE2.csv	2019-07-03 14:11:30	Andre Klekamp 🇪🇺	Osnabrücker/Europäer/Mitglied des Rates der Stadt #Osnabrück/Vorstand SPD Osnabrück	Osnabrück		en				1186	There's a good analog in what @scruffapp founder and CEO Erik Silverberg is saying about ad transparency, nutrition labelling, and the warning I suggested I above. \n\nThe Frito-Lay exec was correct in 1990, but consumers got smarter. #TOA19 https://t.co/hwy7SY6SiL	replied_to												240	263	https://t.co/hwy7SY6SiL	https://twitter.com/chrismessina/status/1146391009640833024/photo/1	pic.twitter.com/hwy7SY6SiL	57	71	0.9251	Person	Erik Silverberg					30	40	scruffapp	171985472	233	239	TOA19	1186				Twitter for iPhone
jsonDE2.csv	2019-09-05 09:24:57					en				4237324042	The State Secretary in the Federal Ministry of #Agriculture @fuchtel promises that the results of the consumer survey on the nutrition label will be implemented. #Nutriscore #berta19 https://t.co/u3EbVD36Ph													183	206	https://t.co/u3EbVD36Ph	https://twitter.com/sabinebonneck/status/1169511722551533569/photo/1	pic.twitter.com/u3EbVD36Ph						domain	30	Entities [Entity Service]	Entity Service top level domain, every item that is in Entity Service should be in this domain	60	68	fuchtel	66750542	47	59	Agriculture					Twitter for iPhone
jsonDE2.csv	2019-03-13 11:06:40					en				231741021	The report of the @EU_Commission on interpretative nutrition labelling systems is not expected before EU elections, says M. Stübgen, Parl. Secretary @bmel , pleading for a national and more flexible solution #dti #kostbar @diabetesDE https://t.co/ZjrxElku3C													236	259	https://t.co/ZjrxElku3C	https://twitter.com/stefaniedDE/status/1105772152605892608/photo/1	pic.twitter.com/ZjrxElku3C	122	131	0.8987	Person	M. Stübgen	domain	38	Political Race		18	32	EU_Commission	157981564	210	214	dti					Twitter for Android
jsonDE2.csv	2019-03-13 11:34:37					en				231741021	The #Nutriscore algorithms have to change if it should become a european labelling solution, says M. Stübgen @bmel , where various labelling models are now being verified. #kostbar @diabetesDE https://t.co/2uyeyryUru	quoted												194	217	https://t.co/2uyeyryUru	https://twitter.com/lmverband/status/1105744275126521856	twitter.com/lmverband/stat…	98	107	0.8836	Person	M. Stübgen					109	114	bmel	322697372	4	15	Nutriscore					Twitter for Android
jsonDE2.csv	2019-09-30 14:30:34	Süddeutsche Zeitung	Der offizielle Twitter-Account der Süddeutschen Zeitung. Alle Redakteure und Kanäle: http://t.co/AjR51c6fBJ · Impressum: http://t.co/73f0c1DSzV	München, Deutschland		de				231741021	Richtig: Wir brauchen eine hohe Durchdringungsrate im Handel! Was nützt der freiwillige #Nutriscore, wenn er nicht eingesetzt wird? https://t.co/fpnJQ3sKc7	quoted												132	155	https://t.co/fpnJQ3sKc7	https://twitter.com/foodwatch_de/status/1178637639114776578	twitter.com/foodwatch_de/s…														88	99	Nutriscore					Twitter for Android
jsonDE2.csv	2019-09-01 10:20:34	SCRUFF	SCRUFF is the dating, social networking, and travel app of choice for a community of more than 15+ million gay, bi, trans, and curious guys worldwide.	#SCRUFFAPP Gay Guys Worldwide		de				294082136	Ohooh, wenn eine Frau #Klöckner das in die Hand nimmt... 🤭\nUnd 'Schutzverband gegen Unwesen in der Wirtschaft' hat gegen Verwendung des #Nutriscore geklagt?\nWer ist das?.?.?\nDer juristische Streit um den #Nutriscore geht in die nächste Runde https://t.co/byb3TjOT3g													242	265	https://t.co/byb3TjOT3g	https://www.tagesspiegel.de/wirtschaft/iglo-will-farbige-naehrwert-angaben-durchsetzen-der-juristische-streit-um-den-nutriscore-geht-in-die-naechste-runde/24961266.html	tagesspiegel.de/wirtschaft/igl…														22	31	Klöckner					Twitter for iPad
jsonDE2.csv	2019-08-14 16:21:02	ISSGesund Ernährung	ISSGesund.at - Online Magazin zum Thema Ernährung mit vielen Kochrezepten. Impressum: https://t.co/hrgmHpFFSm	Austria / Österreich / Vienna		de				1944330356	Obwohl der #NutriScore am besten verstanden wird und am weitesten verbreitet ist, möchte das @bmel einen Sonderweg gehen. Die von @JuliaKloeckner entwickelte Lebensmittel-Kennzeichnung ist für Verbraucher verwirrend @vzbv @foodwatch_de (via @SZ) https://t.co/LhZgqK42TL													247	270	https://t.co/LhZgqK42TL	https://sz.de/1.4563180	sz.de/1.4563180										93	98	bmel	322697372	11	22	NutriScore					Twitter for Android
jsonDE2.csv	2019-10-02 08:29:51	Peter Breun-Goerke	Syndikusrechtsanwalt der Wettbewerbszentrale mit Schwerpunkt Finanzmarkt und Fahrschulen	Bad Homburg vor der Höhe		de				27459820	Noch einfacher wird es mit kombinierten Text- Bildwarnhinweisen. Versteht auch der letzte Fast-Food-Fan ohne Selbstkontrolle. Einfach kann so einfach sein. #BetreutesEssen #Nutriscore https://t.co/6vzHpwqsOn https://t.co/wBTUn9IB1U	quoted												184	207	https://t.co/6vzHpwqsOn	https://twitter.com/chcordes/status/1179282328314617856/photo/1	pic.twitter.com/6vzHpwqsOn						domain	66	Interests and Hobbies Category	A grouping of interests and hobbies entities, like Novelty Food or Destinations					156	171	BetreutesEssen					Twitter for iPhone
jsonDE2.csv	2020-11-08 09:47:56					de				222425943	Na? Lebensmittelampel #nutriscore auch schon auf einigen Produkte entdeckt? Unsere Expertin Sonja Pannenbecker dazu im @weserkurier. @vzbv https://t.co/qQ7rcHpse3		DE	Deutschland	Feature	6.98001	50.945	6.98001	50.945	poi	07d9ca3622084001	Koelnmesse	Koelnmesse	139	162	https://t.co/qQ7rcHpse3	https://www.e-pages.dk/weserkurier/121133/article/1242319/3/4/render/?token=7ea8c539ec0906778186e150767dae15	e-pages.dk/weserkurier/12…										119	131	weserkurier	43872301	22	33	nutriscore					Twitter for Android
jsonDE2.csv	2019-10-03 19:22:13					de				1510342681	Meine alternative zum nutriscore:\nGutes essen hat keine zutatenliste.																																						Twitter for iPhone
jsonDE2.csv	2019-09-30 18:51:36					de				231741021	Lieber @DerSPIEGEL Ihr habt den #Nutriscore nicht verstanden! 🙊🙈 https://t.co/KsjqlZaSN0	quoted												65	88	https://t.co/KsjqlZaSN0	https://twitter.com/spiegelonline/status/1178702062298615810	twitter.com/spiegelonline/…										7	18	derspiegel	2834511	32	43	Nutriscore					Twitter for Android
jsonDE2.csv	2019-11-23 11:33:03	Fix	#NeutroDeutsch	Mainz, Deutschland		de				157357469	kurz, prägnant, richtig. #aufdenpunkt\nDanke: @JuliaKloeckner\n#Nutriscore #Europa #Transparenz https://t.co/8FOwBGNqIA	quoted												94	117	https://t.co/8FOwBGNqIA	https://twitter.com/cdurlp/status/1198185719971356672	twitter.com/cdurlp/status/…										45	60	JuliaKloeckner	29858729	25	37	aufdenpunkt					Twitter for Android
jsonDE2.csv	2019-04-29 11:24:54					de				9.41006e+17	Julia #Klöckner ist die Industrie offensichtlich wichtiger als die Verbraucher*innen und legt der Kennzeichnung per #Nutriscore permanent Steine in den Weg!\n\nWelcher Unions-Minister macht eigentlich noch Politik für die Menschen? \n\n#spd #cdu @foodwatch_de\n\nhttps://t.co/aZ5vVHrRn5													257	280	https://t.co/aZ5vVHrRn5	https://spon.de/afs9Z	spon.de/afs9Z										242	255	foodwatch_de	42628622	6	15	Klöckner					Twitter for Android
jsonDE2.csv	2020-01-20 13:38:05					de				1926030332	Hier sind sie - die ersten Nestlé-Produkte mit #NutriScore: Wagner Pizzen. Thomas Goebel Geschäftsführer von Neslé-Wagner: „Damit wollen wir den Menschen die Entscheidung für eine ausgewogene Ernährung leichter machen.“ #IGW2020 #ZukunftSchmeckt https://t.co/FiKfTGNNBR													246	269	https://t.co/FiKfTGNNBR	https://twitter.com/NestleGermany/status/1219237661321449472/photo/1	pic.twitter.com/FiKfTGNNBR						domain	45	Brand Vertical	Top level entities that describe a Brands industry					47	58	NutriScore					Twitter for iPhone
jsonDE2.csv	2019-09-30 13:29:16	Messina.eth	Biz Dev @joinrepublic • #️⃣ Hashtag inventor • 🏆 #1 Product Hunter • 🟣 @TechmemePodcast co-host • @AlfredApp fan • Buy $HASH • #ODCC1 #ODF4 • 🪙 messina.eth	Oakland, CA		de				277006619	Gute Entscheidung. Ist für die #Verbraucher am besten zu verstehen und sollte jetzt möglichst schnell von uns umgesetzt werden #nutriscore https://t.co/T1MseKn8q2	quoted												139	162	https://t.co/T1MseKn8q2	https://twitter.com/bmel/status/1178628804757069827	twitter.com/bmel/status/11…														31	43	Verbraucher					Twitter for iPad
jsonDE2.csv	2019-05-23 10:57:28					de				84673118	Große Lebensmittelkonzerne gehen voran und kennzeichnen mit #NutriScore #Nährwertkennzeichnung Ministerin @JuliaKloeckner will die verschiedenen Systeme erst prüfen. Es wird Zeit zu handeln! https://t.co/LOntWcA0GH													191	214	https://t.co/LOntWcA0GH	https://twitter.com/ingeblask/status/1131484277340889088/photo/1	pic.twitter.com/LOntWcA0GH										106	121	JuliaKloeckner	29858729	60	71	NutriScore					Twitter for iPhone
jsonDE2.csv	2019-05-24 09:14:05					de				102945062	Gesundes Essen erkennen: Wie der #NutriScore beim Einkauf helfen kann\n\n#Ernährung #Gesundheit #Lebensmittel #Kennzeichnung\n\nhttps://t.co/2OVJqaxkUF													124	147	https://t.co/2OVJqaxkUF	https://www.verbraucherzentrale.de/wissen/lebensmittel/kennzeichnung-und-inhaltsstoffe/gesundes-essen-erkennen-wie-der-nutriscore-beim-einkauf-helfen-kann-36561	verbraucherzentrale.de/wissen/lebensm…														33	44	NutriScore					Twitter for Android
jsonDE2.csv	2019-09-30 20:14:51					de				1.07867e+18	Gestern noch haben wir den BMI optimiert, morgen ist es der NutriScore.																																						Tweetbot for iΟS
jsonDE2.csv	2019-03-29 06:06:39					de				2783810095	foodwatch hat den Ampelcheck gemacht, mit verblüffenden Ergebnissen: https://t.co/SV6iicSx5h =https://t.co/SV6iicSx5h													69	92	https://t.co/SV6iicSx5h	http://www.nutriscore-teilen.foodwatch.de	nutriscore-teilen.foodwatch.de																					Twitter for iPad
jsonDE2.csv	2019-10-01 07:12:46					de				29968190	Ernsthaft, wer blockiert eigentlich eine EU einheitliche aussagekräftige Kennzeichnung von Nährwerten, hat die Industrie Interesse an 28 Einzelregelungen? #nährwerte #Nutriscore https://t.co/EAnFrnoPjs	quoted												179	202	https://t.co/EAnFrnoPjs	https://twitter.com/RenateKuenast/status/1178629547119517696	twitter.com/RenateKuenast/…														156	166	nährwerte					Twitter for Android
jsonDE2.csv	2020-02-03 16:14:29	Sangsemar Spinnse 🌈	Lebe nicht Dein Leben, träume Deinen Traum.	Berlin		de				284944143	Eigentlich hatte ich mich aus der #Nutriscore Diskussion raushalten wollen...., aber ein A für Esspapier❓❓ Wie soll ich das denn in der Beratung erklären? #ISM2020 https://t.co/e278ODMxZ6													164	187	https://t.co/e278ODMxZ6	https://twitter.com/anjaroth2207/status/1224350448905310214/photo/1	pic.twitter.com/e278ODMxZ6														34	45	Nutriscore					Twitter for Android
jsonDE2.csv	2019-04-29 11:31:06					de				192925853	Die Senatorin Frau Prüfer-Storcks spricht sich deutlich für eine verbindliche #Zuckerreduzierungsstrategie #Zuckersteuer #Nutriscore und #Verhältnisprävention aus. Die @DAKGesundheit unterstütz sie dabei gerne 👍 https://t.co/sI4X6f9gdz													212	235	https://t.co/sI4X6f9gdz	https://twitter.com/KSchmieder/status/1122795432323817472/photo/1	pic.twitter.com/sI4X6f9gdz										168	182	DAKGesundheit	57296043	78	106	Zuckerreduzierungsstrategie					Twitter for iPhone
jsonDE2.csv	2019-05-31 15:08:33					de				231741021	Der #NutriScore ist ein marktkonformes Instrument zur Entscheidungsunterstützung. Keine Option wird ausgeschlossen. 3 zur Auswahl stehende Modelle, über die Verbraucher in einer Studie entscheiden sollen. .. Vortrag von Anke Zühlsdorf #ddg2019 https://t.co/tA1bAge7Ms													244	267	https://t.co/tA1bAge7Ms	https://twitter.com/stefaniedDE/status/1134446568382316545/photo/1	pic.twitter.com/tA1bAge7Ms														4	15	NutriScore					Twitter for Android
jsonDE2.csv	2020-01-28 17:15:32					de				27459820	Den Italienern schmeckt #NutriScore einfach nicht. Mediterraner #Nährwert #Akku https://t.co/lTGJFykKFb	quoted												80	103	https://t.co/lTGJFykKFb	https://twitter.com/Perrin_Cam/status/1222189989515137024	twitter.com/Perrin_Cam/sta…														24	35	NutriScore					Twitter for iPhone
jsonDE2.csv	2019-12-14 10:13:44					de				231741021	Das überzeugt mich nicht, weil es einen Weg geben muss, auch Kindern faktenbasierte Orientierung beyond Genussargumenten = Ernährungsbildung zu ermöglichen. Was antwortet ein Kind wohl auf die Frage "wie fühlt sich ein Schokocroissant zum Frühstück an?" - "Toll!" #nutriscore https://t.co/VbAFMQiQfb	quoted												276	299	https://t.co/VbAFMQiQfb	https://twitter.com/bzfe_de/status/1205025248598462464	twitter.com/bzfe_de/status…														264	275	nutriscore					Twitter for Android
jsonDE2.csv	2019-05-24 08:02:10					de				231741021	Danke an das @MRI für diesen Wegweiser zum #Nutriscore ...! @diabetesDE @DDG_Tweets https://t.co/kymjB5v3ec	quoted												84	107	https://t.co/kymjB5v3ec	https://twitter.com/MRI_Aktuelles/status/1131139649114710016	twitter.com/MRI_Aktuelles/…										13	17	mri	322487642	43	54	Nutriscore					Twitter for Android
jsonDE2.csv	2020-11-23 07:22:18					en				253615321	Could carbon labelling soon become routine? -"It's driven by the growing pressure on organisations and countries to decarbonise and meet much more ambitious targets” https://t.co/5kW5XrG0gQ via @FT #EUGreenDeal #food #ClimateActionNow #GreenRecovery #farming #ClimateChangeIsReal		DE	Deutschland	Feature	9.60439	52.3052	9.91848	52.4544	city	48504653e183c91c	Hannover	Hannover, Deutschland	166	189	https://t.co/5kW5XrG0gQ	https://on.ft.com/2UJpAvO	on.ft.com/2UJpAvO						domain	65	Interests and Hobbies Vertical	Top level interests and hobbies groupings, like Food or Travel	194	197	FT	18949452	198	210	EUGreenDeal					Twitter for Android
jsonDE2.csv	2019-09-30 14:18:10					en				231741021	Consumers voted for #Nutriscore in Germany 🎉🎊🎉 Well done, @JuliaKloeckner! #obesity #prevention @diabetesDE https://t.co/pYYEPMbHtB													108	131	https://t.co/pYYEPMbHtB	https://twitter.com/stefaniedDE/status/1178645209216946176/photo/1	pic.twitter.com/pYYEPMbHtB	35	41	0.9976	Place	Germany					58	73	JuliaKloeckner	29858729	20	31	Nutriscore					Twitter for Android
jsonDE2.csv	2019-07-15 12:49:16					en				21791148	As per the last tweet, I also take issue with people labelling foods they are unfamiliar with or feel are expensive trendy things as ‘White people food’. Please at least do a google, 9.9 times out of 10 it is another culture’s food culture you’re dismissing.																							domain	46	Brand Category	Categories within Brand Verticals that narrow down the scope of Brands												Twitter for iPhone
jsonDE2.csv	2020-04-08 20:17:31					de				152598852	Also wenn #Fertigpizza einen #nutriscore von B hat, was hat denn dann einen nutriscore von F? In Speck gewickelte, frittierte Butter???? https://t.co/38QNnhAI1i													137	160	https://t.co/38QNnhAI1i	https://twitter.com/Janosch_Littig/status/1247951722691035137/photo/1	pic.twitter.com/38QNnhAI1i														10	22	Fertigpizza					Twitter for Android
jsonDE2.csv	2019-07-05 21:50:17	Katrin Schmieder	Pause im Job 🧡 & Zeit zum Luftholen 💫. Ab 2022 Zweite Stadträtin/Sozialdezernentin in #Norderstedt	Norderstedt, Deutschland		de				156295299	@Tom_de_Belfore Wer ist denn bei uns zuständig, das auf schnellstem in Gang zu bekommen: Die #Klöckner Julia. Die ist aber gerade damit ausgelastet, den #NutriScore zu verhindern	replied_to																										0	15	Tom_de_Belfore	4333836561	93	102	Klöckner	4333836561				Twitter for Android
jsonDE2.csv	2019-10-01 16:32:42	dpa	Newsdesk Deutsche Presse-Agentur: Froben Homburger (fho) Imke Hendrich (him) Daniel Rademacher (rad) Martin Romanczyk (rom) https://t.co/Ncq2dlPsth	Berlin		de				53404075	@stenoRT @zeitonline Na woher weiß man denn was anteilig zu viel drin ist, bei einem schlechten nutriscore?	replied_to																										0	8	stenoRT	290812058				290812058				Twitter for iPhone
jsonDE2.csv	2019-08-22 10:17:55	MRI				de				9.83319e+17	@RenateKuenast @Klaus_Mueller @foodwatch_de @dpa @GrueneBundestag Ich ärgere mich jedesmal, wenn ich die #Zutatenliste lese, wo die #Lebensmittelindustrie überall #Zucker rein macht.\n\nDie #NutriScore könnte ein richtiger Weg sein.\n\n@Deprifrei	replied_to																										0	14	RenateKuenast	1425265488	105	118	Zutatenliste	1425265488				Twitter for Android
jsonDE2.csv	2020-06-28 11:54:12	McCain Foods Canada	We believe the best memories are made over food everyone loves, like Superfries, Deep 'n Delicious Cakes & Pizza Pockets. Social Terms: https://t.co/8Sy9bWeAc5	Canada		en				20484594	@nickmward "... labelling itself is also likely to be contested, including country of origin labelling."\n https://t.co/18x0wr7Bzk	replied_to	DE	Deutschland	Feature	12.8873	52.3419	13.1681	52.5145	city	659395aaea6aa724	Potsdam	Potsdam, Deutschland	106	129	https://t.co/18x0wr7Bzk	https://www.which.co.uk/news/2020/06/basic-food-standards-under-threat-from-us-trade-deal/	which.co.uk/news/2020/06/b…										0	10	nickmward	22243473				22243473				Twitter for Android
jsonDE2.csv	2020-11-22 12:59:36					de				46130806	@mccainfoods Mikrowellenpommes mit Schlonz. Laut Nutriscore wichtiger Bestandteil einer vollwertigen Ernährung 👍\n\nhttps://t.co/K2cw373tiv https://t.co/3kmtSnKX8c		DE	Deutschland	Feature	9.89387	48.7536	9.99663	48.8196	city	13d3ec8aa938cf1c	Heubach	Heubach, Deutschland	114	137	https://t.co/K2cw373tiv	https://de.m.wikipedia.org/wiki/Nutri-Score	de.m.wikipedia.org/wiki/Nutri-Sco…										0	12	mccainfoods	296033165				296033165				Twitter for Android
jsonDE2.csv	2019-12-04 21:36:29					de				157357469	@lmverband @julia_marg @vzbv Lieber @lmverband , viele andere, die Euch besonnene, inhaltliche Arbeit zutrauen, gibt's vielleicht gar nicht mehr. Sicher nicht mit Blick auf Eure lange Kampagne gegen #Nutriscore .\nWarum nicht mit #Germanmut u. #Transparenz Schritte nach vorn? @JuliaKloeckner macht's hier vor	replied_to																										0	10	lmverband	1671248730	199	210	Nutriscore	1671248730				Twitter for Android
jsonDE2.csv	2019-06-26 23:34:56					de				139265661	@JuliaKloeckner sie taugen wirklich zu gar nichts….unfassbar wie sie Politik betreiben! Egal ob #Nutriscore oder #Landwirtschaft! Sie sind eine Fehlbesetzung….																											0	15	JuliaKloeckner	29858729	96	107	Nutriscore	29858729				Tweetbot for iΟS
jsonDE2.csv	2019-10-01 16:09:20	Grüne im Bundestag 🇪🇺🏳️‍🌈	Auf Grün kommt's an!	Deutschland, Berlin		de				127462925	@JostMaurinTAZ Ich war mir sicher, dass wir um #NutriScore nicht herumkommen !	replied_to																										0	14	JostMaurinTAZ	488614084	47	58	NutriScore	488614084				Twitter for iPad
jsonDE2.csv	2019-08-21 22:20:54					en				27459820	@HercbergS @RenateKuenast @Klaus_Mueller @foodwatch_de @dpa @GrueneBundestag It‘s the competition. Private label looking for differentiation. #NutriScore	replied_to																										0	10	HercbergS	2333109386	142	153	NutriScore	2333109386				Twitter for iPad
jsonDE2.csv	2019-09-19 15:56:46					de				7.88711e+17	@Hanno_Bender Das LG Hamburg hat Iglo den Nutriscore untersagt und als Verstoß gegen die HCVO bewertet. Das dürfte nach meiner Einschätzung weiteren Ärger geben	replied_to																										0	13	Hanno_Bender	132301982				132301982				Twitter for iPhone
jsonDE2.csv	2020-06-25 04:48:07					de				9.83319e+17	@foodwatch_de @Frontal21 @JuliaKloeckner Ich finde es lästig, die Zutatenliste der verarbeiteten #Lebensmittel durchzulesen. Die #Nutriscore ist dabei eine Unterstützung dabei. Danke Frau #Klöckner, #Lobbyismus pur. #Nestlé &amp; Co.	replied_to	DE	Deutschland	Feature	8.57291	49.352	8.79384	49.4602	city	0851007f4d4c6fc5	Heidelberg	Heidelberg, Deutschland											domain	45	Brand Vertical	Top level entities that describe a Brands industry	0	13	foodwatch_de	42628622	97	110	Lebensmittel	42628622				Twitter for Android
jsonDE2.csv	2019-10-01 08:48:51	Roman #Depression #WirSindMehr	Single-Mann der trotz #Depressionen den Sinn für Humor nicht verloren hat!\nMensch👨‍🦱Europäer🇪🇺Erdenbürger🌏 \n#MachtdasLandgerecht \n#MindestRentefürAlle	NRW		de				102982310	@bmel @JuliaKloeckner Ganz eigennützig und zur Zeitersparnis: Werden @rewe_group &amp; @REWE_Supermarkt den Nutriscore für Eigenmarken einführen?	replied_to																										0	5	bmel	322697372				322697372				Twitter for Android
jsonDE2.csv	2019-05-04 11:30:31					de				8.55146e+17	.@JuliaKloeckner verheimlicht uns eine Studie zur Lebensmittelampel, die dem #Nutriscore offenbar ein gutes Zeugnis ausstellt. Statt mit offenen Karten zu spielen, hat sie Monate später nur eine überarbeitete Fassung veröffentlicht. Schluss mit der Geheimniskrämerei! (1)																											1	16	JuliaKloeckner	29858729	77	88	Nutriscore					Twitter Web Client
jsonDE2.csv	2019-04-30 00:51:57					de				2783810095	.@JuliaKloeckner verheimlicht Studie zur Lebensmittelampel, die dem #Nutriscore ein gutes Zeugnis ausstellt. Monate später veröffentlicht sie nun eine überarbeitete Fassung. Schluss mit der Geheimniskrämerei! Her mit der Ampel-Studie: https://t.co/yjx80I7CeI													235	258	https://t.co/yjx80I7CeI	http://aktion-ampelstudie-mitmachen.foodwatch.de	…on-ampelstudie-mitmachen.foodwatch.de										1	16	JuliaKloeckner	29858729	68	79	Nutriscore					Twitter for iPad
jsonDE2.csv	2019-12-21 18:48:16					de				15094783	... der Nutriscore ab durch die Decke in den 7. Himmel schnellen.	replied_to																																	15094783				Twitter for iPhone
jsonDE2.csv	2019-03-21 15:59:03					de				42628622	#NutriScore:\nGute Pizza, böse Pizza: So entlarvt die Nährwertampel ungesunde Lebensmittel https://t.co/rpCaLjn5Uh #Ampel													90	113	https://t.co/rpCaLjn5Uh	https://mobil.stern.de/wirtschaft/news/nutri-score--wie-die-naehrwertampel-ungesunde-lebensmittel-entlarvt-8632064.html?utm_campaign=alle&utm_medium=rss-feed&utm_source=standard	mobil.stern.de/wirtschaft/new…						domain	65	Interests and Hobbies Vertical	Top level interests and hobbies groupings, like Food or Travel					0	11	NutriScore					Twitter for iPhone
jsonDE2.csv	2019-09-30 20:14:40					de				113032792	#Nutriscore verpflichtend und europaweit einführen!\nAuf unserem nächsten Landesparteitagsantrag wird es auch darum gehen.\nhttps://t.co/cvD127oUJJ													122	145	https://t.co/cvD127oUJJ	https://lpt-26-27_10_2019.antragsgruen.de/lpt-26-27_10_2019/Lebensmittelkennzeichnung_durch_Nutri-Score-System-62138	lpt-26-27_10_2019.antragsgruen.de/lpt-26-27_10_2…														0	11	Nutriscore					Twitter for iPhone
jsonDE2.csv	2019-08-14 14:00:46					de				132036708	#nutriscore ist jetzt eine tendenz in #Berlin\n\nhttps://t.co/ypu4NwzY3R https://t.co/fJBTF0sUAj													47	70	https://t.co/ypu4NwzY3R	https://www.trendsmap.com/r/DE_BER_ociaja	trendsmap.com/r/DE_BER_ociaja														0	11	nutriscore					Trendsmap Alerting
jsonDE2.csv	2019-09-30 13:31:54	NU	Interesse an Politik nicht nur im Südschwarzwald, sondern auch in Europa	Schwarzwald		de				132036708	#nutriscore ist jetzt eine tendenz in #Berlin\n\nhttps://t.co/ypu4NwzY3R https://t.co/cJqKZrFpfw													47	70	https://t.co/ypu4NwzY3R	https://www.trendsmap.com/r/DE_BER_ociaja	trendsmap.com/r/DE_BER_ociaja														0	11	nutriscore					Trendsmap Alerting
jsonDE2.csv	2020-06-24 20:53:54					de				15839481	#Nutriscore ist eine geeignete Lebensmittelkennzeichnung. Das fand auch das Max-Rubner-Institut in einer Studie fürs @bmel heraus. Was macht @juliakloeckner? 🤑\nGeheim halten und ihr lobbygeschwängertes eigenes Modell durchdrücken... 🙄\nhttps://t.co/rAxU0IF13K													235	258	https://t.co/rAxU0IF13K	https://www.foodwatch.org/de/aktuelle-nachrichten/2020/lobbywuensche-statt-wissenschaft-kloeckner-ministerium-nahm-einfluss-auf-ampel-studie/	foodwatch.org/de/aktuelle-na…										117	122	bmel	322697372	0	11	Nutriscore					Twitter for Android
jsonDE2.csv	2020-02-14 12:46:05	Anja Roth	Essen und Trinken - das sind meine Themen.	Niederkassel		de				9.26089e+17	#NestleWagner @NestleGermany feiern 35 Jahre Steinofenpizza. Umsatz des #Pizza-Herstellers ist 2019 um 3% gestiegen. 2020 neues Logo uns als erste Marke im #nestle-Konzern #nutriscore-Einführung. https://t.co/6zRpdwHVsT													196	219	https://t.co/6zRpdwHVsT	https://twitter.com/M_Crescenti/status/1228284271909130241/photo/1	pic.twitter.com/6zRpdwHVsT						domain	65	Interests and Hobbies Vertical	Top level interests and hobbies groupings, like Food or Travel	14	28	NestleGermany	1926030332	0	13	NestleWagner					Twitter for iPhone
jsonDE2.csv													DE	Deutschland	Feature	8.70196	50.1625	8.79281	50.2229	city	64bf9432368fca3e	Bad Vilbel	Bad Vilbel, Deutschland															27	37	BlogAgrar	470071552
jsonDE2.csv													DE	Deutschland	Feature	10.831	49.9119	10.9124	49.9497	city	f8a58bdeab0f9878	Hallstadt	Hallstadt, Deutschland																			250	258	farming
jsonDE2.csv													DE	Deutschland	Feature	8.1156	48.8146	8.26444	48.92	city	0a906e2cded61434	Rastatt	Rastatt, Deutschland																			259	279	ClimateChangeIsReal
jsonDE2.csv													DE	Deutschland	Feature	8.09236	49.8453	8.18556	49.8997	city	ed53a3e5adefaf6c	Saulheim	Saulheim, Deutschland	138	161	https://t.co/3kmtSnKX8c	https://twitter.com/MarioHachemer/status/1330481052188553216/photo/1	pic.twitter.com/3kmtSnKX8c
jsonDE2.csv													DE	Deutschland	Feature	6.68873	51.1244	6.93989	51.3525	city	b7d3c12268abd20e	Düsseldorf	Düsseldorf, Deutschland															133	138	vzbv	49129101
jsonDE2.csv													DE	Deutschland	Feature	13.3302	52.4987	13.3775	52.5227	neighborhood	7e762e3dd999b30d	Tiergarten	Tiergarten, Berlin																			27	45	LebensmittelAmpel
jsonDE2.csv													DE	Deutschland	Feature	8.5603	49.7957	8.74971	49.9538	city	e11a8b8e3771f9fa	Darmstadt	Darmstadt, Deutschland																			50	62	Deutschland
jsonDE2.csv													DE	Deutschland	Feature	7.58271	49.5598	7.65603	49.6152	city	12e9d2519ba55219	Wolfstein	Wolfstein, Deutschland																			77	90	Lebensmittel
jsonDE2.csv													DE	Deutschland	Feature	8.19295	47.6711	8.3784	47.7793	city	14773ce92d2d86e2	Ühlingen-Birkendorf	Ühlingen-Birkendorf, Deutschland											entity	7.81975e+17	CPG		14	24	frontal21	1.41814e+18	129	140	Nutriscore
jsonDE2.csv													DE	Deutschland	Feature	7.02247	50.6325	7.2107	50.7744	city	e99b714fe65be4fb	Bonn	Bonn, Deutschland											domain	47	Brand	Brands and Companies					216	223	Nestlé
jsonDE2.csv													DE	Deutschland	Feature	7.92978	52.2176	8.18071	52.3374	city	b309eeca0a699fc1	Osnabrück	Osnabrück, Deutschland											domain	48	Product	Products created by Brands. Examples: Ford Explorer, Apple iPhone.
jsonDE2.csv																																						141	156	JuliaKloeckner	29858729
jsonDE2.csv																																		domain	46	Brand Category	Categories within Brand Verticals that narrow down the scope of Brands	22	32	DLTonline	3524459475
jsonDE2.csv																																		entity	7.81975e+17	Candy/Gum		73	87	NestleGermany	1926030332
jsonDE2.csv																																		domain	47	Brand	Brands and Companies
jsonDE2.csv																																		entity	10024011447	Nestle
jsonDE2.csv																																		entity	10046158484	Nestle USA
jsonDE2.csv																																		entity	8.25048e+17	Food	Food
jsonDE2.csv																																		domain	65	Interests and Hobbies Vertical	Top level interests and hobbies groupings, like Food or Travel
jsonDE2.csv																																										173	191	Ernährungsberater
jsonDE2.csv																																										192	205	Lebensmittel
jsonDE2.csv																																		entity	10024011447	Nestle
jsonDE2.csv																																		entity	10046158484	Nestle USA
jsonDE2.csv																																		entity	8.25048e+17	Food	Food
jsonDE2.csv																																		entity	8.24777e+17	Generic Food	Generic Food
jsonDE2.csv																																		entity	7.81975e+17	Candy/Gum
jsonDE2.csv																																		entity	10024011447	Nestle
jsonDE2.csv																																		entity	10046158484	Nestle USA
jsonDE2.csv																																						23	28	vzbv	49129101	243	255	Transparenz
jsonDE2.csv																																						36	46	lmverband	1671248730
jsonDE2.csv																																		domain	30	Entities [Entity Service]	Entity Service top level domain, every item that is in Entity Service should be in this domain
jsonDE2.csv																																		entity	8.47865e+17	Fast food	Fast food
jsonDE2.csv																																						9	20	zeitonline	5715752
jsonDE2.csv																																						6	21	JuliaKloeckner	29858729
jsonDE2.csv																																						69	80	rewe_group	429833111
jsonDE2.csv																																										159	170	Nutriscore
jsonDE2.csv																																										167	178	Nutriscore
jsonDE2.csv																																						96	107	diabetesDE	216728843	75	83	obesity
jsonDE2.csv																																										127	138	nutriscore
jsonDE2.csv																																		entity	8.47869e+17	Home & family	Hobbies and interests					162	173	Nutriscore
jsonDE2.csv																																										174	182	berta19
jsonDE2.csv																																						30	43	foodwatch_de	42628622	165	172	Zucker
jsonDE2.csv																																						44	48	dpa	40227292	191	202	NutriScore
jsonDE2.csv																																						11	25	RenateKuenast	1425265488
jsonDE2.csv																																						26	40	Klaus_Mueller	19109203
jsonDE2.csv																																						55	59	dpa	40227292
jsonDE2.csv																																						60	76	GrueneBundestag	24725119
jsonDE2.csv																																						130	145	JuliaKloeckner	29858729
jsonDE2.csv																																						223	236	foodwatch_de	42628622
jsonDE2.csv																								71	94	https://t.co/fJBTF0sUAj	https://twitter.com/TrendsBerlin/status/1161608600197980162/photo/1	pic.twitter.com/fJBTF0sUAj														38	45	Berlin
jsonDE2.csv																																		domain	47	Brand	Brands and Companies
jsonDE2.csv																																										114	129	Landwirtschaft
jsonDE2.csv																																										235	243	ddg2019
jsonDE2.csv																																										71	81	Ernährung
jsonDE2.csv																																										82	93	Gesundheit
jsonDE2.csv																																										94	107	Lebensmittel
jsonDE2.csv																																										108	122	Kennzeichnung
jsonDE2.csv																																						60	71	diabetesDE	216728843
jsonDE2.csv																																						72	83	DDG_Tweets	931592989
jsonDE2.csv																																										72	94	Nährwertkennzeichnung
jsonDE2.csv																																						158	172	RenateKuenast	1425265488	74	87	Küchengeräte
jsonDE2.csv																																						173	183	Deprifrei	337111971	89	102	Lebensmittel
jsonDE2.csv																																						184	193	foodoase	197458511	112	122	Pestizide
jsonDE2.csv																																						194	207	foodwatch_de	42628622	245	256	NutriScore
jsonDE2.csv																																						208	218	issgesund	18898622	257	265	Rastatt
jsonDE2.csv																																						219	229	LZnetNEWS	38395025	266	277	BadenBaden
jsonDE2.csv																																						230	244	FoodsharingDE	1103077507
jsonDE2.csv																																										107	120	Zuckersteuer
jsonDE2.csv																																										121	132	Nutriscore
jsonDE2.csv																																										137	158	Verhältnisprävention
jsonDE2.csv																																										116	127	Nutriscore
jsonDE2.csv																																										232	236	spd
jsonDE2.csv																																										237	241	cdu
jsonDE2.csv																								94	117	https://t.co/SV6iicSx5h	http://www.nutriscore-teilen.foodwatch.de	nutriscore-teilen.foodwatch.de
jsonDE2.csv																																		entity	8.25048e+17	Food	Food					114	120	Ampel
jsonDE2.csv																																		domain	30	Entities [Entity Service]	Entity Service top level domain, every item that is in Entity Service should be in this domain
jsonDE2.csv																																		entity	8.24777e+17	Generic Food	Generic Food
jsonDE2.csv																																		domain	30	Entities [Entity Service]	Entity Service top level domain, every item that is in Entity Service should be in this domain
jsonDE2.csv																																		entity	8.25049e+17	Pizza	Pizza
jsonDE2.csv																																		domain	65	Interests and Hobbies Vertical	Top level interests and hobbies groupings, like Food or Travel
jsonDE2.csv																																		entity	8.25048e+17	Food	Food
jsonDE2.csv																																		domain	30	Entities [Entity Service]	Entity Service top level domain, every item that is in Entity Service should be in this domain
jsonDE2.csv																																		entity	8.24777e+17	Generic Food	Generic Food
jsonDE2.csv																																		domain	30	Entities [Entity Service]	Entity Service top level domain, every item that is in Entity Service should be in this domain
jsonDE2.csv																																		entity	8.25049e+17	Pizza	Pizza
jsonDE2.csv																																						182	193	diabetesDE	216728843	173	181	kostbar
jsonDE2.csv																																		entity	1.09395e+18	European elections	European elections	151	156	bmel	322697372	215	223	kostbar
jsonDE2.csv																																						224	235	diabetesDE	216728843
jsonDE2.csv		AgropolitX	Agrarökonom & Agrarblogger - kritische Kommentare zur Agrarpolitik 🚜🥕																																			6	21	JuliaKloeckner	29858729
jsonDE2.csv		Alexander von Witzleben	Retired @EU_Commission PhD CAU Kiel #EUI #EconomicHistory #EUinfluencer 2021 second in #sustainability #ClimateActionNow #EUGreenDeal #FutureOfEurope #startups	Brussels									DE	Deutschland	Feature	6.99619	49.582	6.99619	49.582	poi	07d9f67488488000	Nestlé Wagner GmbH	Nestlé Wagner GmbH																			199	210	nutriscore
jsonDE2.csv		Anna H 💚 🇪🇺 #FBPA #FBPPR #ClimateEmergency	Retired linguist. #FBPE I am European. Passions: The environment, health and the rights of all living creatures; equality for all peoples. #OneHumanRace	This Planet																														entity	7.81975e+17	Services
jsonDE2.csv		Anna Tranziska	Grüne Landesvorsitzende Schleswig-Holstein, Naturwissenschaftlerin, Unternehmerin, Läuferin und nicht zuletzt Mutter von Vieren	Pinneberg																																						61	72	Nutriscore
jsonDE2.csv		Bernhard Barkmann 👨‍🌾	- #Agraraktivist\n- kleinbäuerlicher Massentierhalter aus dem #Emsland\n- #Agrarblogger\n- # Mitbegründer von @AgChatDE\n- #Graswurzler #grüneKreuze	Messingen, Deutschland									DE	Deutschland	Feature	13.0883	52.3381	13.7609	52.6753	city	3078869807f9dd36	Berlin	Berlin, Deutschland											entity	10029267663	Financial Times						235	249	GreenRecovery
jsonDE2.csv		BZfE	Das Bundeszentrum für #Ernährung informiert rund ums #Essen. Neutral, wissenschaftlich fundiert und nah am Alltag. RT ≠ Zustimmung	Deutschland Bonn																														entity	7.81975e+17	CPG
jsonDE2.csv		Camille Perrin	Senior Food Policy Officer @beuc 🍎 Mostly (but not only!) about #food & #agriculture. 🇫🇷 in 🇧🇪. Views personal, RT = interesting (she/her)	Brussels																														domain	30	Entities [Entity Service]	Entity Service top level domain, every item that is in Entity Service should be in this domain					156	163	nestle
jsonDE2.csv		Carola Löffler 🥕🐂🐈	Ich bin Bäuerin auf einem Milchviehbetrieb im Hochschwarzwald und vielseitig interessiert, z.B. an Landwirtschaftspolitik, Kultur, Frauenrechte und Umweltschutz	Titisee-Neustadt, Germany									DE	Deutschland	Feature	8.42016	53.3951	10.3252	53.9647	city	5bcd72da50f0ee77	Hamburg	Hamburg, Deutschland											domain	47	Brand	Brands and Companies					217	234	ClimateActionNow
jsonDE2.csv		CDU Rheinland-Pfalz	CDU-Landesverband Rheinland-Pfalz. #starkimteam\nImpressum: https://t.co/Xh2MqEUExQ	Rheinland-Pfalz																														domain	65	Interests and Hobbies Vertical	Top level interests and hobbies groupings, like Food or Travel
jsonDE2.csv		Christian Cordes	Founding Member CLUB OF HAMBURG Foundation. Corporate Affairs Leader. ➡️ Private Account & Views.	Hamburg																				196	219	https://t.co/6zRpdwHVsT	https://twitter.com/M_Crescenti/status/1228284271909130241/photo/1	pic.twitter.com/6zRpdwHVsT						entity	8.25048e+17	Food	Food					72	78	Pizza
jsonDE2.csv		Christian P.	News rund um Apple, iPhone, iPad & Mac	49.437176,11.105239																																						136	147	Nutriscore
jsonDE2.csv		cybr6̶̙̟̠͒G̸̞̈́͑̃6̷͚̾🔥	demonic presence at unsafe levels	Germany/Berlin																														entity	8.25049e+17	Pizza	Pizza
jsonDE2.csv		DAK-Gesundheit	Hier twittert die Pressestelle der @DAKGesundheit Infos und Neuigkeiten für Medien und Politik.	Hamburg, Germany																																						153	164	NutriScore
jsonDE2.csv		Daniela Marx, 323ppm	Für mehr #Landwirtschaft in Kitas mitten in der Stadt! \n#Klimawandel #Ernährung #Agrarwende #Politik #Naturschutz #Umweltschutz #Bildung	Berlin																														entity	7.81975e+17	CPG		6	21	JuliaKloeckner	29858729	199	210	NutriScore
jsonDE2.csv		DER SPIEGEL	Nachrichten, Analysen, Kommentare, Videos, Podcasts: Mehr als 500 SPIEGEL-Journalistinnen und Journalisten decken auf, setzen Themen und sorgen für Kontext.	Hamburg, Germany																																						73	80	Europa
jsonDE2.csv		Deutsche Diabetes Gesellschaft	Diabetes \nerforschen • behandeln • verhindern\n\nImpressum: https://t.co/IdRcDbFPwD; \nDatenschutz: https://t.co/6Ga1bZKIto	Berlin																																		15	29	Klaus_Mueller	19109203	133	155	Lebensmittelindustrie
jsonDE2.csv		diabetesDE	Hier twittert diabetesDE - Deutsche Diabetes-Hilfe über Therapie & Prävention sowie politische Fragen rund um Diabetes / Datenschutz: https://t.co/CO60QDUiOb	Berlin																														domain	30	Entities [Entity Service]	Entity Service top level domain, every item that is in Entity Service should be in this domain
jsonDE2.csv		Erin	Freelance writer & editor. 🇨🇦🇯🇲🇬🇧settled in southern Germany with her family. Tweets in English or dodgy German. Travel & culture blogger. sie/her	Heidelberg, Germany																																						84	95	prevention
jsonDE2.csv		European Commission 🇪🇺	News and information from the European Commission. Social media and data protection policy: https://t.co/3fIsD1hPfD	Brussels, Belgium																				240	263	https://t.co/hwy7SY6SiL	https://twitter.com/chrismessina/status/1146391009640833024/photo/1	pic.twitter.com/hwy7SY6SiL
jsonDE2.csv		Falko Blumenthal	betriebsräte gründen & beraten ■ technologie & digitale arbeit ■ @igm_muenchen im isar valley ■ DMs offen.	München																														entity	7.81975e+17	CPG						220	228	IGW2020
jsonDE2.csv		Financial Times	Big stories and breaking news headlines as they are published on https://t.co/5BsmLs9y1Z. For a curated feed of our journalism, follow @financialtimes	London									DE	Deutschland	Feature	12.7305	50.7428	13.053	50.9032	city	0431c9d831366ed6	Chemnitz	Chemnitz, Deutschland																			104	122	Lebendmittelampel
jsonDE2.csv		Food Oase	Impressum: https://t.co/jFqhW59lXS Datenschutz: https://t.co/r8LoM1OSmK	Ahrensburg																																		41	54	foodwatch_de	42628622
jsonDE2.csv		foodsharing	#foodsharing is caring! Wir retten Lebensmittel! Mach mit! #Lebensmittelretterin #Foodwaste #Lebensmittelverschwendung																																			242	245	SZ	114508061
jsonDE2.csv		Frank Schmidtsdorff	Strategist & Program Officer - Sustainable Development & Labour Market Policies - Global Greens, GewerkschaftsGruen - World Literature & Psychedelic Chamber Dub	🇪🇺																														entity	10026378521	Google
jsonDE2.csv		Frank Steibli	🇪🇺 Für mehr Zusammenhalt in #Europa, beruflich Kliniksprecher in #Mittelhessen, in der Freizeit @spd_linden, @diggiessen, seit 1974 @vfb-Fan ⚽️⚪️❤️⚪️	Heuchelheim, Deutschland																														domain	48	Product	Products created by Brands. Examples: Ford Explorer, Apple iPhone.
jsonDE2.csv		Gerrit Müller	Deutschlands normalster Mensch der Welt	Koblenz																														entity	8.24777e+17	Generic Food	Generic Food
jsonDE2.csv		Hanno Bender	Vollblutjournalist, Volljurist, Vater, Ressortleiter Recht & Politik der Lebensmittel Zeitung. Hier privat. Siehe auch https://t.co/bACUssHqGv & https://t.co/QDR8RGyFOd	Frankfurt a.M.																				208	231	https://t.co/wBTUn9IB1U	https://twitter.com/bmel/status/1178699361380966400	twitter.com/bmel/status/11…						entity	8.60134e+17	Cuisines	Cuisines					172	183	Nutriscore
jsonDE2.csv		Hercberg Serge	Professeur de Nutrition, Faculté Médecine Université Sorbonne Paris Nord (ex Paris 13)\nEquipe de Recherche en Epidémiologie Nutritionnelle Inserm/Inra/Cnam/UP13	Paris, France																																		87	103	REWE_Supermarkt	156586173
jsonDE2.csv		Inaktiver Account	Die Redaktion von frontal twittert ab sofort unter @ZDFfrontal.																															entity	8.25048e+17	Food	Food
jsonDE2.csv		inge blask	Landtagsabgeordnete der SPD für Hemer, Menden, Balve, Neuenrade und Plettenberg #landtagnrw #ltnrw #nrwspd #märkischerkreis	Hemer																																		236	246	Deprifrei	337111971
jsonDE2.csv		Janosch Littig	Leo McGarry für @katharina_binz und @Vielfalt_RLP	Im Zentrum des Seins																														entity	8.25063e+17	Cheese	Cheese
jsonDE2.csv		Jost Maurin	Redakteur der taz. die tageszeitung. Themen: Land- und Ernährungswirtschaft, Agrarpolitik, Gentechnik, Tierschutz, Umwelt.\nImpressum: https://t.co/q6jASrMasj	Berlin																																						74	79	Akku
jsonDE2.csv		Julia Klöckner	Mitglied des Deutschen Bundestages, Bundesministerin für Ernährung und Landwirtschaft (kom.), Landesvorsitzende CDU Rheinland-Pfalz, stv. CDU-Bundesvorsitzende																															domain	30	Entities [Entity Service]	Entity Service top level domain, every item that is in Entity Service should be in this domain
jsonDE2.csv		Julia Marg	Geschäftsführerin Deutsche Stiftung Verbraucherschutz https://t.co/lJKvmpJVXF, @Stiftung_DSV. Hier privat.	Berlin, Deutschland																														domain	48	Product	Products created by Brands. Examples: Ford Explorer, Apple iPhone.
jsonDE2.csv		Julian Laduga (Bas)	Drehbuchautor | PR-Berater | Psychologe | Biologe | Copywriter | PR Consultant | Psychologist | Biologist 🇿🇦 🇩🇪 🇳🇱	CPT/DTM/DUS/CGN/AMS/BKK/MNL																														entity	8.25049e+17	Pizza	Pizza
jsonDE2.csv		Klaus Müller	Hier twittert der Vorstand des Verbraucherzentrale Bundesverbands @vzbv (Foto: vzbv/Gert Baumbach). Views are my own. RT ≠ endorsement.	Berlin																																						109	124	BetreutesEssen
jsonDE2.csv		LANDKREISTAG	Der Deutsche Landkreistag ist der kommunale Spitzenverband der 294 Landkreise auf Bundesebene.	Berlin																														entity	8.25049e+17	Pizza	Pizza
jsonDE2.csv		Lebensmittel Zeitung	Die Lebensmittel Zeitung ist das führende Fachmedium für die Konsumgüter-Branche. Impressum: http://t.co/CnpuwYgF	Germany																																		217	222	vzbv	49129101
jsonDE2.csv		Lebensmittelverband Deutschland	Spitzenverband der deutschen Lebensmittelwirtschaft. Von #AckerbisTeller.\nImpressum: https://t.co/M8NAGa7K36	Berlin/Brüssel																														domain	47	Brand	Brands and Companies
jsonDE2.csv		Leo Salvador #Diätassistent	#Ernâhrungswissenschaftler #Diätassistent #München #Speaker 💚🍴🍉\nPasión educación nutricional Somos lo que comemos y algo más...\n🇬🇧🇪🇸🇩🇪	Munich, Baviera																																						158	172	diätassistent
jsonDE2.csv		Marcelo Crescenti	Journalist, Head of Comms @Fairtrade_DE. Opinions are my own.	Köln, Deutschland																																						213	235	dietistanutricionista
jsonDE2.csv		Mario Hachemer	Dad of two boys / CTO of @fastbillnews	Frankfurt / Germany									DE	Deutschland	Feature	9.7637	53.6088	9.8291	53.684	city	d2de95ce61028811	Pinneberg	Pinneberg, Deutschland															11	16	bmel	322697372
jsonDE2.csv		Max Rubner-Institut	Für das Max Rubner-Institut, Bundesforschungsinstitut für Ernährung und Lebensmittel, twittert die Pressesprecherin.																																			49	65	GrueneBundestag	24725119
jsonDE2.csv		nutriception	Boys'Dad° Nutritionist° Nutritional Scientist° Dietetician° Nutritional Economist° Ernährungstherapeut° Ernährungswissenschaftler° Oecotrophologe°	Düsseldorf																																						204	215	Nutriscore
jsonDE2.csv		O.F.	Unterstütze privat Umweltschutz, Nachhaltigkeit, Bio-Produkte (und gerne jeden Monat auch @msf_de) - bin Berufskoch und Vegetarier fördere regionale Produkte.	😷 Kassel, Deutschland																																						97	108	Nutriscore
jsonDE2.csv		Philipp	Digital Native, alter neu #Grüner, eingesessener #Chemnitzer, unendlich #Erneuerbareenergie, follower heißt nicht Zustimmung!	Chemnitz, Sachsen																																		11	22	julia_marg	1690962289	229	239	Germanmut
jsonDE2.csv		Renate Künast	Feministin, Foodie, Gärtnerin. Anwältin, Sozialarbeiterin, MdB. Verbraucherministerin.a.D , Kämpfe für das Recht + RechtaufNahrung #darumGrün	Berlin																																		276	291	JuliaKloeckner	29858729
jsonDE2.csv		REWE	Alles zu #REWE & dem REWE Lieferservice hier auf Twitter! Fragen oder Anregungen? Schreib uns einfach! Datenschutzhinweise & Impressum: https://t.co/YEqz0VJbV4	Köln, Deutschland																														domain	47	Brand	Brands and Companies
jsonDE2.csv		REWE Group	Hier twittert das Team Corporate Affairs der REWE Group rund um die Themen Handel, E-Commerce, Ernährung, CSR und Politik. Impressum: https://t.co/lRx2NxwhYN	Köln																														domain	46	Brand Category	Categories within Brand Verticals that narrow down the scope of Brands					229	245	ZukunftSchmeckt
jsonDE2.csv		Rote Socke Michael J. Rittel🌈 السلام على الناس 🐝	Ohne meinen amerikanischen Großvater, John Henry Light, wäre hier absolute Stille! 🇩🇪https://t.co/P47UXosb2M … Rolle vorwärts 👨🏻‍🦽	Unter der Dusche																																						64	73	Nährwert
jsonDE2.csv		Sarah Franke	freie Journalistin (Schwerpunkte: #Nachhaltigkeit, #WomenEmpowerment & #Feminismus) Ein ❤️ für dieses Internet. Mitglied im Landesvorstand des @DJVNieders.	Hannover, Deutschland									DE	Deutschland	Feature	7.13699	50.6703	7.16623	50.6904	neighborhood	277c77bca4e7339b	Alt-Godesberg	Alt-Godesberg, Bonn															13	26	foodwatch_de	42628622	94	105	NutriScore
jsonDE2.csv		Scroggie 🏴󠁧󠁢󠁳󠁣󠁴󠁿🇪🇺🇩🇪	Scottish gay man, living in Germany. Speak English, French & German. Into science, linguistics, politics and puns	Mainz, Deutschland, Europa																																						29	40	nutriscore
jsonDE2.csv		Sebastian Steineke	2013-2021 🇩🇪Mitglied des Bundestages @cducsubt Mitgliederbeauftragter @cdu_brandenburg Fraktionsvorsitzender CDU OPR - 👻 stein_sebastian 📷 sebastiansteineke	Neuruppin																																						173	184	Nutriscore
jsonDE2.csv		silkemsaktiv	◇Ernährung ◇Gesundheit ◇Regional\n◇Soziales	Rastatt, Deutschland																														entity	8.24777e+17	Generic Food	Generic Food
jsonDE2.csv		SPIEGEL ONLINE	Aus SPIEGEL ONLINE wird DER SPIEGEL. Folgen Sie uns auf Twitter hier @DerSPIEGEL	Hamburg																																						81	93	Transparenz
jsonDE2.csv		Thomas	Vegan. Fahrradfahrer. No AfD. Blocke AfD Retweeter.	Hessen, Deutschland									DE	Deutschland	Feature	8.4816	53.011	8.99059	53.229	city	5b1a29f98ababf57	Bremen	Bremen, Deutschland											entity	8.25048e+17	Food	Food					211	216	food
jsonDE2.csv		Timo 🚀🚀🚀																																domain	30	Entities [Entity Service]	Entity Service top level domain, every item that is in Entity Service should be in this domain
jsonDE2.csv		Tom de Belfore	💙Tinos+Ikaria, Greece. \nWien,Mannheim,Tinos\n🎵Sodade\n💕 the Music from Cesaria Evora and Mikis Theodorakis. \nLeben und leben lassen 🌈\nSozialdemokrat 🌊\nSingle	Vienna,Austria & Tinos,Greece																				71	94	https://t.co/cJqKZrFpfw	https://twitter.com/TrendsBerlin/status/1178633562943315968/photo/1	pic.twitter.com/cJqKZrFpfw														38	45	Berlin
jsonDE2.csv		Trendsmap Berlin	Local Twitter Trends for Berlin, Deutschland.\n\nA fully automated account run by @Trendsmap	Berlin, Deutschland																																						88	98	InkaBause
jsonDE2.csv		Verbraucherzentrale	Offizieller Twitter-Account der Verbraucherzentrale Bremen | Folgen Sie auch unserer Vorständin @annabel_oelmann Impressum: https://t.co/CTOqagLssZ	Bremen									DE	Deutschland	Feature	6.9905	49.5219	7.21357	49.6394	city	cd2a6aaeac543e72	Nohfelden	Nohfelden, Deutschland											entity	7.81975e+17	Candy/Gum						199	210	Lobbyismus
jsonDE2.csv		Verbraucherzentrale	Verbraucherzentrale Bundesverband | Das Presseteam twittert über Verbraucherpolitik | Impressum: https://t.co/3VcoqGND2M | Datenschutz: https://t.co/eiBA8797P0	Germany									DE	Deutschland	Feature	8.11059	49.9937	8.38655	50.152	city	d9ab00bf39ffe714	Wiesbaden	Wiesbaden, Deutschland											entity	10046158484	Nestle USA
jsonDE2.csv		WESER-KURIER	Moin! Hier twittert die Redaktion des WESER-KURIER. \nhttps://t.co/VRtJ7t25Xu	Bremen | Germany									DE	Deutschland	Feature	9.95482	53.5433	9.99016	53.5639	neighborhood	7eff73e51fff54c7	Sankt Pauli	Sankt Pauli, Hamburg											entity	10024011447	Nestle
jsonDE2.csv		ZEIT ONLINE	Ja, das ist unser offizieller Twitter-Account. Hier bekommen Sie die wichtigsten Geschichten und aktuelle News. || Impressum: https://t.co/HsU5BwJnJk	Berlin und Hamburg, Germany																																						155	163	ISM2020
jsonDE3.csv		diabetesDE	Hier twittert diabetesDE - Deutsche Diabetes-Hilfe über Therapie & Prävention sowie politische Fragen rund um Diabetes / Datenschutz: https://t.co/CO60QDUiOb	Berlin	en		226020012	UPDATE: California governor signs new date label bill to reduce food waste\n\nhttps://t.co/7mFNHVKpFy					DE	Deutschland	Feature	9.03876	48.6923	9.31594	48.8663	city	e385d4d639c6a423	Stuttgart	Stuttgart, Deutschland											domain	65	Interests and Hobbies Vertical	Top level interests and hobbies groupings, like Food or Travel
jsonDE3.csv					en		9300262	One state with 600,000 people and an anti-GMO streak is about to rewrite U.S. food labels https://t.co/9N7Xfq3GEn https://t.co/T6ysWPw3yy																														503	519	OrganicConsumer	19982260
jsonDE3.csv		bofrost*	Hier twittert #CorporateCommunications von bofrost*, europ. Marktführer im #Direktvertrieb von Eis- und TK-Spezialitäten. Impressum: https://t.co/TsioX9Qpll	Straelen, Deutschland	en		19507168	In the renegotiated #NAFTA texts, Ch 12 Sectoral Annexes, Annex 12.E.4 #MedicalDevices, Section 2 speaks to the #IMDRF harmonization (but ToC not explicitly state), Section 3 speaks to #MDSAP by name, &amp; Section 6 speaks to #MutualRecognition of possible #Regulatory market auth. https://t.co/V1LJ9SAQfq	quoted				DE	Deutschland	Feature	11.4943	49.8876	11.6728	49.9772	city	7024b2f1414f7653	Bayreuth	Bayreuth, Deutschland															241	256	JuliaKloeckner	29858729
jsonDE3.csv	2019-02-08 07:54:01	Matthias van der Donk	human beeing, husband, father of two / Interest in politics / views my own, RT not always endorsement	Rheinberg, Deutschland	de	en	29858729	Die „Kinderspeisekarten“ sind meist einfach nur eines: ungesund. Zu kalorienreich, zu wenig Gemüse und nicht den @dge_wissen -Standards entsprechend. Interessante Studie heute in #FaS . Grund, sich mit Vertretern der Restaurants/Gaststätten zu treffen! https://t.co/t5ySJrropD		157357469	a bit exaggerated "Corporations against Min Klöckner" ... She recently expressed herself more positively on #Nutriscore "I am fundamentally open to such voluntary approaches of individual companies" Speech 24.1.19 Berlin transl. @bofrostDE @JuliaKloeckner https://t.co/cwgtCeJYWK		DE	Deutschland	Feature	6.20535	51.3547	6.32374	51.4884	city	2c32052a7122a5c1	Straelen	Straelen, Deutschland	257	280	https://t.co/cwgtCeJYWK	https://goo.gl/mstm4B	goo.gl/mstm4B	40	51	0.4047	Person	Min Klöckner					230	240	bofrostDE	8.72348e+17	108	119	Nutriscore					Twitter for Android
jsonDE3.csv		Kavin Senapathy	Independent science writer/journalist. "A delight to fact check." Actually OCD. I ❤️ music videos. Editor @SciMoms. Rep @CBucci_bookman \nShe/her	Madison, WI	en		28596803	@rjmlaird and, like all our products, is sold at unbeatable, everyday low prices. 3/3	replied_to																													491	502	SenSanders	29442313
jsonDE3.csv					en		3009467887	@Resourceful1942 @kevinfolta @H_O_G_ @normonics @Organics4Free @glyphosate9570 @JodiKoberinski @nntaleb @peterdoodes @dietwaldclaus @PamelaDrew @VirginiaInCal @robles_jdaniel @AlafiaGrandma @givmebass @foodevomovie @garyruskin @pcronald @BioBeef @ksenapathy @TheJusticeDept @MonsantoCo @kavn @GMWatch @TheGOPJesus @thefoodbabe @food_democracy @Kenn_QBE @MainWfJ @Kauairockchick @LeeCamp @stedsimple …	replied_to																									entity	8.25048e+17	Food	Food
jsonDE3.csv		Will We Ever Learn?	Compulsive bridge-burner, former #homeless, #musicproducer w #MH struggles. #Shadowbanned by #twitter for issues my #music seeks to highlight\n #CapitalismKills	London, United uhhm... Kingdom	en		3009467887	@Resourceful1942 @kevinfolta @H_O_G_ @normonics @Organics4Free @glyphosate9570 @JodiKoberinski @nntaleb @peterdoodes @dietwaldclaus @PamelaDrew @VirginiaInCal @robles_jdaniel @AlafiaGrandma @givmebass @foodevomovie @garyruskin @pcronald @BioBeef @ksenapathy @TheJusticeDept @MonsantoCo @kavn @GMWatch @TheGOPJesus @thefoodbabe @food_democracy @Kenn_QBE @MainWfJ @Kauairockchick @LeeCamp @stedsimple …	replied_to																													520	528	GMWatch	66401056
jsonDE3.csv	2017-10-17 14:27:55					en				7.29688e+17	Transparency in labelling - excited to see CA pass quality date vs. safety date on #food. Could reduce #foodwaste by 5.5mln tons CA alone https://t.co/NZ9xnFNUvo	quoted												138	161	https://t.co/NZ9xnFNUvo	https://twitter.com/wastedive/status/920005424660672512	twitter.com/wastedive/stat…	43	44	0.5464	Place	CA									83	88	food					Twitter for iPhone
jsonDE3.csv	2018-10-01 07:52:48	RegulatoryDad🇨🇦	Husband, Dad of 3, MBA. I tweet #Business, #Regulatory & #Policy with a #MedTech twist. Advisor @H2i_UofT, Ex-Councillor @HeartandStroke, & Ex-Senator @RyersonU	Toronto, Ontario, Canada		en				19507168	On last part of Article 12.E.4., Section 7 allows for #MedicalDevice re-labelling (adding supplemental labelling) after #importation but before #sale. IANAL so not sure how to reconcile that with @GovCanHealth Food and Drugs Act RSC 1987 c.F-27 def'n of "sale" which incls import.	replied_to																										196	209	GovCanHealth	36375825	54	68	MedicalDevice	19507168				Twitter for Android
jsonDE3.csv	2019-02-04 23:13:36					de				231741021	Ein verpflichtendes Menue Labelling = Nährwertkennzeichnung auf der Speisekarte wäre ein wichtiger erster Schritt - nicht nur für Kindermenüs, sondern auch für Speisen für Erwachsene, incl Kantinenessen, food to go und Essen vom Lieferdienst. https://t.co/0n7lSlqUfr	quoted	DE	Deutschland	Feature	13.0883	52.3381	13.7609	52.6753	city	3078869807f9dd36	Berlin	Berlin, Deutschland	243	266	https://t.co/0n7lSlqUfr	https://twitter.com/JuliaKloeckner/status/1091992673639190528	twitter.com/JuliaKloeckner…																					Twitter for Android
jsonDE3.csv	2015-10-30 15:46:27					en				1349402088	Do you know your dates? ⅓ of #foodwaste is linked #date #labelling on #food products https://t.co/fn7CDVWZcK													85	108	https://t.co/fn7CDVWZcK	http://ec.europa.eu/food/safety/docs/fw_eu_actions_date_marking_infographic_en.pdf	ec.europa.eu/food/safety/do…														29	39	foodwaste					Twitter Web Client
jsonDE3.csv	2017-08-18 17:21:57					en				8.55146e+17	@stuartsmyth66 @kevinfolta @H_O_G_ @normonics @Organics4Free @glyphosate9570 @JodiKoberinski @nntaleb @peterdoodes @dietwaldclaus @PamelaDrew @VirginiaInCal @robles_jdaniel @AlafiaGrandma @givmebass @foodevomovie @garyruskin @pcronald @BioBeef @ksenapathy @TheJusticeDept @MonsantoCo @kavn @GMWatch @TheGOPJesus @thefoodbabe @food_democracy @Kenn_QBE @MainWfJ @Kauairockchick @LeeCamp @stedsimple @E…	replied_to																	619	627	0.2793	Product	GM Salmon	domain	10	Person	Named people in the world like Nelson Mandela	0	14	stuartsmyth66	3009467887				3009467887				Twitter Web Client
jsonDE3.csv	2017-08-18 18:28:26	Kevin Folta	Professor, scientist, fruit grower, good trouble, sustainable food / farm technology. Thoughts are my own. Talking Biotech host. https://t.co/537pTtVsOy	Archer, FL		en				8.55146e+17	@stuartsmyth66 @kevinfolta @H_O_G_ @normonics @Organics4Free @glyphosate9570 @JodiKoberinski @nntaleb @peterdoodes @dietwaldclaus @PamelaDrew @VirginiaInCal @robles_jdaniel @AlafiaGrandma @givmebass @foodevomovie @garyruskin @pcronald @BioBeef @ksenapathy @TheJusticeDept @MonsantoCo @kavn @GMWatch @TheGOPJesus @thefoodbabe @food_democracy @Kenn_QBE @MainWfJ @Kauairockchick @LeeCamp @stedsimple @E…	replied_to																						domain	10	Person	Named people in the world like Nelson Mandela	0	14	stuartsmyth66	3009467887				3009467887				Twitter Web Client
jsonDE3.csv	2017-10-10 23:59:20					en				8.55146e+17	@peterdoodes @4rodas1volante @HillaryGuess @NOtoGMOs @12Bly @stuartsmyth66 @glyphosate9570 @evidencebiased @Flwrgirl66x @H_O_G_ @Organics4Free @NightStar44 @MarquisLeDain @mindmixradio @Kenn_QBE @rosevine3 @robles_jdaniel @LelaMarkham @TheGOPJesus @stedsimple @TheBeelievers @kevinfolta @craig73webster @jjdalzell @JCali1969 @normonics @JodiKoberinski @nntaleb @dietwaldclaus @PamelaDrew @VirginiaIn…	replied_to																						domain	10	Person	Named people in the world like Nelson Mandela	13	28	4rodas1volante	17439145				566294853				Twitter Web Client
jsonDE3.csv	2018-10-17 15:54:36					de				231741021	@Danone findet den #Nutriscore am überzeugendsten im Hinblick auf eine leicht verständliche #Nährwertkennzeichnung. Da stimmen wir gerne zu. @diabetesDE #wenigerZucker https://t.co/xrm55l6mNN		DE	Deutschland	Feature	8.47272	50.0155	8.8005	50.227	city	c589d9d6ed38927c	Frankfurt am Main	Frankfurt am Main, Deutschland	168	191	https://t.co/xrm55l6mNN	https://twitter.com/stefaniedDE/status/1052558499610279936/photo/1	pic.twitter.com/xrm55l6mNN						domain	45	Brand Vertical	Top level entities that describe a Brands industry	0	7	Danone	570715775	19	30	Nutriscore	570715775				Twitter for Android
jsonDE3.csv	2016-03-25 16:13:39					en				337862963	@AldiUK The point is about knowing where food has come from. Labelling with fake names is misleading.	replied_to																										0	7	AldiUK	28596803				28596803				Twitter for Android
jsonDE3.csv	2016-03-17 17:49:39					en				2552409932	#Vermont cares about quality: quality education, quality of life and overt, true labelling of quality food. https://t.co/6Csn7bwwgu	quoted												109	132	https://t.co/6Csn7bwwgu	https://twitter.com/politico/status/710494680786591748	twitter.com/politico/statu…														0	8	Vermont					Twitter for Android
jsonDE3.csv	2017-03-29 11:15:38					en				328203	#cloudnativecon labelling the food for intolerances would be good or at least if it's vegan. Since that means i can avoid lactose.																															0	15	cloudnativecon					Twitter for Android
jsonDE3.csv																																										120	132	importation
jsonDE3.csv																																										144	149	sale
jsonDE3.csv																																										103	113	foodwaste
jsonDE3.csv																																		entity	8.84781e+17	Donald Trump Jr.	Donald Trump Jr.	29	42	HillaryGuess	1119760256
jsonDE3.csv																																		entity	7.81975e+17	CPG		53	59	12Bly	489479693
jsonDE3.csv																																		domain	47	Brand	Brands and Companies	60	74	stuartsmyth66	3009467887
jsonDE3.csv																																		entity	10043471663	Monsanto		75	90	glyphosate9570	8.64584e+17
jsonDE3.csv																																						120	127	h_o_g_	1.32889e+18
jsonDE3.csv																																						143	155	NightStar44	87403565
jsonDE3.csv																																						260	274	TheBeelievers	7.3114e+17
jsonDE3.csv																																						275	286	kevinfolta	129193125
jsonDE3.csv																																						287	302	craig73webster	93420496
jsonDE3.csv																																						303	313	jjdalzell	1246016197
jsonDE3.csv																																						352	360	nntaleb	381289719
jsonDE3.csv																																						361	375	dietwaldclaus	2466716347
jsonDE3.csv																																						376	387	PamelaDrew	15774775
jsonDE3.csv																																						388	402	VirginiaInCal	398354613
jsonDE3.csv																																						418	428	givmebass	3184854367
jsonDE3.csv																																						474	485	ksenapathy	519596463
jsonDE3.csv																																						486	501	TheJusticeDept	73181712
jsonDE3.csv																																						514	519	kavn	17719592
jsonDE3.csv																																						529	541	thefoodbabe	162890663
jsonDE3.csv																																						542	557	food_democracy	18091706
jsonDE3.csv																																						567	582	Kauairockchick	244417596
jsonDE3.csv																																						583	591	LeeCamp	19580890
jsonDE3.csv																																						592	601	EcoWatch	78361556
jsonDE3.csv																																						602	618	realDonaldTrump	25073877
jsonDE3.csv																																		entity	10037721459	Bernie Sanders	US Senator Bernie Sanders (VT)\n	15	26	kevinfolta	129193125
jsonDE3.csv																																		domain	45	Brand Vertical	Top level entities that describe a Brands industry	46	60	Organics4Free	1332710534
jsonDE3.csv																																		entity	7.81975e+17	CPG		61	76	glyphosate9570	8.64584e+17
jsonDE3.csv																																		domain	46	Brand Category	Categories within Brand Verticals that narrow down the scope of Brands	77	92	JodiKoberinski	2345872214
jsonDE3.csv																																		entity	7.81975e+17	Snacks		93	101	nntaleb	381289719
jsonDE3.csv																																		entity	7.81975e+17	Beverage		130	141	PamelaDrew	15774775
jsonDE3.csv																																		domain	47	Brand	Brands and Companies	142	156	VirginiaInCal	398354613
jsonDE3.csv																																		entity	10026288001	Pepsi		157	172	robles_jdaniel	3131742505
jsonDE3.csv																																		domain	47	Brand	Brands and Companies	188	198	givmebass	3184854367
jsonDE3.csv																																		domain	47	Brand	Brands and Companies	213	224	garyruskin	16897082
jsonDE3.csv																																		entity	10043471663	Monsanto		225	234	pcronald	14849816
jsonDE3.csv																																		domain	30	Entities [Entity Service]	Entity Service top level domain, every item that is in Entity Service should be in this domain	290	298	GMWatch	66401056
jsonDE3.csv																																		entity	8.24777e+17	Generic Food	Generic Food	299	311	TheGOPJesus	493429544
jsonDE3.csv																																		entity	8.34828e+17	Generic Drinks	Generic Drinks	325	340	food_democracy	18091706
jsonDE3.csv																																		domain	67	Interests and Hobbies	Interests, opinions, and behaviors of individuals, groups, or cultures; like Speciality Cooking or Theme Parks	360	375	Kauairockchick	244417596
jsonDE3.csv																																						397	406	EcoWatch	78361556
jsonDE3.csv																																						407	421	RushkaJohnson	3130638112
jsonDE3.csv																																						422	437	MADGEAustralia	74411287
jsonDE3.csv																																						438	450	anhcampaign	64390100
jsonDE3.csv																																						451	464	IFOAMorganic	568369689
jsonDE3.csv																																						480	490	rosevine3	1541965728
jsonDE3.csv																																						535	549	TheBeelievers	7.3114e+17
jsonDE3.csv																																						561	576	PositivelyJoan	124896632
jsonDE3.csv																																						577	583	pepsi	18139619
jsonDE3.csv																																		domain	35	Politician	Politicians in the world, like Joe Biden	27	34	h_o_g_	1.32889e+18
jsonDE3.csv																																		domain	46	Brand Category	Categories within Brand Verticals that narrow down the scope of Brands	77	92	JodiKoberinski	2345872214
jsonDE3.csv																																		entity	7.81975e+17	Snacks		93	101	nntaleb	381289719
jsonDE3.csv																																		domain	46	Brand Category	Categories within Brand Verticals that narrow down the scope of Brands	115	129	dietwaldclaus	2466716347
jsonDE3.csv																																		domain	47	Brand	Brands and Companies	188	198	givmebass	3184854367
jsonDE3.csv																																		entity	8.34828e+17	Drinks	Drinks	284	289	kavn	17719592
jsonDE3.csv																																		entity	8.24777e+17	Generic Food	Generic Food	299	311	TheGOPJesus	493429544
jsonDE3.csv																																						385	396	stedsimple	953127818
jsonDE3.csv																																						407	421	RushkaJohnson	3130638112
jsonDE3.csv																																						422	437	MADGEAustralia	74411287
jsonDE3.csv																																						438	450	anhcampaign	64390100
jsonDE3.csv																																						451	464	IFOAMorganic	568369689
jsonDE3.csv																																						480	490	rosevine3	1541965728
jsonDE3.csv																																						520	534	occupytheseed	760689595
jsonDE3.csv																																						550	560	yesmaam74	1167576132
jsonDE3.csv																																						561	576	PositivelyJoan	124896632
jsonDE3.csv																																						577	583	pepsi	18139619
jsonDE3.csv																																						584	592	Doritos	31143489
jsonDE3.csv																																										50	55	date
jsonDE3.csv																																										56	66	labelling
jsonDE3.csv																																										70	75	food
jsonDE3.csv		@pcronald	UC Davis #rice geneticist & author of Tomorrow's Table: Organic #Farming Genetics & the Future of #Food. TED talk. My lab studies #immunity & #stress. #scicomm	In the lab or garden in Davis																																		385	396	stedsimple	953127818
jsonDE3.csv		|0|	Citizen. Absolute mathematics fan. Spatially perceptive. Unlimited creativity with high-octane passion for life.\n\n\nIf you fall down, get up and try harder.	Null Island																																		491	502	SenSanders	29442313
jsonDE3.csv		©Britt	technology architect, network, security, privacy, protocols	Cyberspace,																																		206	221	robles_jdaniel	3131742505
jsonDE3.csv		4rodas1volante.com	Blog dedicado ao automovel e a tudo o que o rodeia. Não só um meio de transporte mas parte da expressão humana. Procuramos informar, debater, divertir...	Perdido algures em Portugal																																		156	170	MarquisLeDain	72943129
jsonDE3.csv		Aldi Stores UK	The Official Aldi UK Twitter Page. Follow us for Everyday Amazing products, competitions and recipes. For customer services enquiries: https://t.co/xhj5W8NFmc																																			465	479	grocerymakers	1.21678e+18
jsonDE3.csv		ANH International	An internationally active, non-profit promoting natural & sustainable approaches to healthcare worldwide. Passionate about creating health & working with nature	Chilworth, Surrey, UK																														domain	47	Brand	Brands and Companies	213	224	garyruskin	16897082
jsonDE3.csv		Anna H 💚 🇪🇺 #FBPA #FBPPR #ClimateEmergency	Retired linguist. #FBPE I am European. Passions: The environment, health and the rights of all living creatures; equality for all peoples. #OneHumanRace	This Planet																																		128	142	Organics4Free	1332710534
jsonDE3.csv		Bernie Sanders	U.S. Senator Bernie Sanders of Vermont, Chair of the Senate Budget Committee, is the longest-serving independent in congressional history.	Vermont/DC																														entity	8.25048e+17	Food	Food	244	255	ksenapathy	519596463
jsonDE3.csv		blueavitar	gay atheist who strongly believes that the left has no business apologizing for archaic religious ideologies, and a defender of civilization against barbarism.																																			235	247	TheGOPJesus	493429544
jsonDE3.csv		bob	a larger than average carbon based humanoid\n(they/them or he/him). head of tech\nops @dxw.\nco organiser of @DevOpsDaysLDN	london																														entity	8.50144e+17	Soda	Soda	376	384	LeeCamp	19580890
jsonDE3.csv		Christine Rich 🎗️🦋🍀🐝🌻	Planting seeds one garden at a time \n#OrganicConsumers #SeedFreedom https://t.co/4OHbUCgQ6U #OffGrid #Aquaponics	Planet Earth Under the Stars																																		248	259	stedsimple	953127818
jsonDE3.csv		Craig Webster	Happily married to wonderful lady, proud father of 3 young men- owner of 1 GSD and butler to 3 cats																															domain	35	Politician	Politicians in the world, like Joe Biden	27	34	h_o_g_	1.32889e+18
jsonDE3.csv		Danone	Our mission is to bring health through food to as many people as possible, in a sustainable way. #OnePlanetOneHealth	Paris, France									DE	Deutschland	Feature	6.77257	50.8303	7.16237	51.0849	city	8abc99434d4f5d28	Köln	Köln, Deutschland											entity	10044370067	Danone
jsonDE3.csv		Donald Trump Jr.	EVP of Development & Acquisitions The @Trump Organization, Father, Outdoorsman, In a past life Boardroom Advisor on The Apprentice, Pronouns: Your Hero																															domain	47	Brand	Brands and Companies	142	156	VirginiaInCal	398354613
jsonDE3.csv		Doritos	Not only are our chips packed with serious crunch and bold flavors, the DORITOS® brand is all about intense experiences in snacking and beyond.	United States																														domain	67	Interests and Hobbies	Interests, opinions, and behaviors of individuals, groups, or cultures; like Speciality Cooking or Theme Parks	360	375	Kauairockchick	244417596
jsonDE3.csv		Dr. Stefanie Gerlach		Schwäbisch-Gmünd, Deutschland									DE	Deutschland	Feature	7.4838	53.3321	7.73042	53.4621	city	3e1bd6b083c8f226	Großefehn	Großefehn, Deutschland											domain	47	Brand	Brands and Companies					153	167	wenigerZucker
jsonDE3.csv		EcoWatch	Environmental News for a Healthier Planet and Life																															entity	7.81975e+17	Beverage		130	141	PamelaDrew	15774775
jsonDE3.csv		Food Babe	Vani Hari | Food Activist Co-Founder of https://t.co/nnnWchGCaA | New York Times Best Selling Author | Named one of the Most Influential People on the Internet by Time Mag	Charlotte, NC																														entity	10037721459	Bernie Sanders	US Senator Bernie Sanders (VT)\n	15	26	kevinfolta	129193125
jsonDE3.csv		Food Democracy Now!	Dave Murphy, Founder, Food Democracy Now! - Creating a sustainable future through positive food and farm policies.	Earth																														entity	10037721459	Bernie Sanders	US Senator Bernie Sanders (VT)\n	35	45	normonics	381813372
jsonDE3.csv		Food Evolution	Directed by @TheAcademy Award® Nominee Scott Hamilton Kennedy (@blackvalleyfilm). Now available on demand; coming to France Feb. 20, 2019! #FactsNotFear																															domain	66	Interests and Hobbies Category	A grouping of interests and hobbies entities, like Novelty Food or Destinations	312	324	thefoodbabe	162890663
jsonDE3.csv		FoodLoop	The FoodLoop platform offers the Food Retail Industry the first channel to promote discounted best before date deals in real time on an app.	Cologne																																		535	549	TheBeelievers	7.3114e+17
jsonDE3.csv		Gary Ruskin	executive director, @USRightToKnow, working to expose corporate wrongdoing and government failures threatening our health, food and environment.																															entity	8.50144e+17	Soda	Soda	376	384	LeeCamp	19580890
jsonDE3.csv		GMA																																domain	65	Interests and Hobbies Vertical	Top level interests and hobbies groupings, like Food or Travel	235	243	BioBeef	197147355
jsonDE3.csv		GMOfree gal.	Let's imagine a world where we're all friends. #WorldPeace #GMOFree #USconstitutionIsBae	planet Earth																														entity	8.34828e+17	Drinks	Drinks	284	289	kavn	17719592
jsonDE3.csv		GMWatch	Countering the propaganda of the biotech industry. Subscribe to free email newsletters: https://t.co/4GoxRVvA0L																																			584	592	Doritos	31143489
jsonDE3.csv		Health Canada and PHAC	HC and PHAC - #COVID19 updates - Promoting and protecting Canadians' health and safety - Français: @GouvCanSante - Notice: https://t.co/Ip8s53kZnp	Canada																														domain	45	Brand Vertical	Top level entities that describe a Brands industry	43	52	NOtoGMOs	49989431
jsonDE3.csv		HOG	...	Rio de Janeiro, Brasil																																		325	335	normonics	381813372
jsonDE3.csv		IFOAM 🌱💚	Since 1972, IFOAM - Organics International is the global organic umbrella organization. Advocacy for the global organic food & farming movement.	Bonn, Germany																														entity	10043471663	Monsanto		225	234	pcronald	14849816
jsonDE3.csv		Jodi Koberinski	Justice for Dafonte Miller. Dangerous Ideas 2021: #LandBack Settler descended living in Six Nations/ Anishnaabe Territories #Antifascism #StopShopping she/they	University of Waterloo																														entity	10026467892	Doritos		199	212	foodevomovie	7.91341e+17
jsonDE3.csv		Joe Norman	Applied Complexity Science LLC\nhttps://t.co/kcLM9zwHL7\nhttps://t.co/2EoABU2gka\nhttps://t.co/xwEqNymIoj\nhttps://t.co/lfctNxteo3	New Hampshire, USA																														domain	46	Brand Category	Categories within Brand Verticals that narrow down the scope of Brands	115	129	dietwaldclaus	2466716347
jsonDE3.csv		Johnathan J. Dalzell	Head of Grassland & Plant Science @AFBI_NI & honorary senior lecturer @QUBelfast All views my own.\n\n#PlantHealth\n#CropScience\n#Horticulture	Belfast, Northern Ireland, UK																														entity	10037721459	Bernie Sanders	US Senator Bernie Sanders (VT)\n	35	45	normonics	381813372
jsonDE3.csv		Julia Klöckner	Mitglied des Deutschen Bundestages, Bundesministerin für Ernährung und Landwirtschaft (kom.), Landesvorsitzende CDU Rheinland-Pfalz, stv. CDU-Bundesvorsitzende										DE	Deutschland	Feature	6.68873	51.1244	6.93989	51.3525	city	b7d3c12268abd20e	Düsseldorf	Düsseldorf, Deutschland											entity	7.81975e+17	CPG		141	152	diabetesDE	216728843	92	114	Nährwertkennzeichnung
jsonDE3.csv		Justice Department	Official DOJ Twitter account. Please refer to DOJ’s privacy policy for DOJ use of third-party websites here: https://t.co/KTqaoCW2kY	United States of America																																		520	534	occupytheseed	760689595
jsonDE3.csv		Lee Camp [Redacted]	Host & head writer of Redacted Tonight\nLatest book- https://t.co/xCcqGFAou3\nWebsite- https://t.co/oi7DhjoIwV, https://t.co/sDpz9FMGBL\nPodcasts- "Government Secrets" & "Common Censored"	Washington, DC																														entity	7.81975e+17	CPG		61	76	glyphosate9570	8.64584e+17
jsonDE3.csv		Lee Greene	Mighty oaks from tiny acorns grow -- Serial entrepreneur passionate about making the world healthier through good food innovation, sustainable ag and ehealth.	Chicago (USA) & Düsseldorf (D)																														domain	65	Interests and Hobbies Vertical	Top level interests and hobbies groupings, like Food or Travel	91	106	evidencebiased	18204625
jsonDE3.csv		Lela Markham	An Alaska author & blogger. https://t.co/5Od4IjXzne… Conversations https://t.co/UP16Lyd7vZ Commentary https://t.co/ZM2sgZAtVA	Fairbanks Alaska																																		465	473	BioBeef	197147355
jsonDE3.csv		MADGE Australia Inc	We research the food system to allow people to choose food that is good for those who eat it, grow it, produce and sell it; and for land and environment.	Australia																														entity	10026467892	Doritos		199	212	foodevomovie	7.91341e+17
jsonDE3.csv		Marquis Le Dain	Adept of Pineal Activation अग्नि #Agni True doctrine.\nThe way to Enlightenment, is literally on the tip of our tongues.	London																																		429	442	foodevomovie	7.91341e+17
jsonDE3.csv		Moms Across America	Our mission is to educate and empower mothers and others with actions and solutions to create healthy communities.	National																														domain	66	Interests and Hobbies Category	A grouping of interests and hobbies entities, like Novelty Food or Destinations	312	324	thefoodbabe	162890663
jsonDE3.csv		Mrs. Ash	👑 of typos.	Hawaii, USA																														domain	45	Brand Vertical	Top level entities that describe a Brands industry	46	60	Organics4Free	1332710534
jsonDE3.csv		Nassim Nicholas Taleb	Flaneur: probability (philosophy, mathematics), probability (real life), Phoenician wine, deadlifts & dead languages. Greco-Levantine. #RWRI. Uber rating ~4.9																															domain	65	Interests and Hobbies Vertical	Top level interests and hobbies groupings, like Food or Travel	235	243	BioBeef	197147355
jsonDE3.csv		Organic Consumers Association	Want to take action on the issues you care about—pesticides, factory farms and GMOs? Subscribe to our newsletter, #OrganicBytes 👉 https://t.co/bJ8DuQwwIv	Finland, Minnesota																														domain	65	Interests and Hobbies Vertical	Top level interests and hobbies groupings, like Food or Travel	256	271	TheJusticeDept	73181712
jsonDE3.csv		Pepsi	If you’re looking for hot takes and cold Pepsi, you’ve come to the right place.																															entity	8.34828e+17	Generic Drinks	Generic Drinks	325	340	food_democracy	18091706
jsonDE3.csv		POLITICO	Nobody knows politics like POLITICO. Got a news tip for us? \n👉 https://t.co/fp9nugJuND	Washington, D.C.																																		503	519	OrganicConsumer	19982260
jsonDE3.csv		Prof Alison Van Eenennaam (@BioBeef)	Animal 🐄 biotechnology/genetics, Uni of CA Davis, Mom, Consumer, Ag Science, 🇦🇺🇺🇸 Melbourne Uni, Food Evolution https://t.co/HGmEgkDYwX	Davis, California																																		465	479	grocerymakers	1.21678e+18
jsonDE3.csv		Protect Nature	Change the world, one person at a time, naturally.Changer le monde pour le meilleur, une personne a la fois, naturallement! Atheist. AntiGMO counter to Pro GMO	Montreal																																		195	205	rosevine3	1541965728
jsonDE3.csv		Robespierre was woke	"..if Men are to be precluded from offering their Sentiments on a matter ... reason is of no use" George Washington	Mountains Arkansas																																		171	184	mindmixradio	7.56217e+17
jsonDE3.csv		RushkaJohnson	Saved by Grace - Healthy, happy, home ed mom, #seedfreedom, people freedom - Live,laugh,love, peace! co owner of @deathbycoffeesa																															entity	10026288001	Pepsi		157	172	robles_jdaniel	3131742505
jsonDE3.csv		Ryan Laird	Comms & Marketing Officer for space | @PoweringSpace | Studying @Lborocollege for @ciminfo Level 4 #DigitalMarketing | #ISUnet | Views expressed are my own	Leicester/Harwell Campus, UK																																		397	406	EcoWatch	78361556
jsonDE3.csv		Seed Freedom	Join us to stop the corporate hijack of seed & food: https://t.co/TrwkjFqgcn. Add your actions to the Seed Freedom calendar: https://t.co/qR3sZ4AaLa																															domain	30	Entities [Entity Service]	Entity Service top level domain, every item that is in Entity Service should be in this domain	290	298	GMWatch	66401056
jsonDE3.csv		Stuart Smyth	I hold the Agri-Food Innovation & Sustainability Enhancement Chair at USask. Interested in sustainability, agriculture, innovation, food & benefits of biotech.	Saskatoon, Saskatchewan																																		222	234	LelaMarkham	2767433286
jsonDE3.csv		The Beelievers	Music with Mission but it seems our mission is failing.\nWe made songs called Mr Gove & Bee Friendly Flowers but sadly got censored. If we don't laugh we'll cry.	The U bee of K																																		619	634	DonaldJTrumpJr	39344374
jsonDE3.csv		Tracy Hernandez	Scroll my media page - if you like it, follow!\n#RedPill #MemeMaker\n#Organic, #Fermented #Superfoods!\n[Former atheist, leftist, lgbtq, abortive]\n+ I'm #Catholic!	Oakland, CA																																		336	351	JodiKoberinski	2345872214
jsonDE3.csv		Virginia	Reformed Political Junkie. #bluebloods fan That’s It For Now.	CA, USA🇺🇸																														domain	65	Interests and Hobbies Vertical	Top level interests and hobbies groupings, like Food or Travel	256	271	TheJusticeDept	73181712
jsonDE3.csv		Waste Dive	We provide business journalism and in-depth insight into the news/trends shaping the waste and recycling industry. Sign up here: https://t.co/WNgzfUbfvJ	Washington, DC																														entity	8.25048e+17	Food	Food	107	119	Flwrgirl66x	2870693652
jsonDE3.csv		𝚍𝚒𝚎𝚝𝚠𝚊𝚕𝚍 𝚌𝚕𝚊𝚞𝚜 - ¡no pasarán!	仕方がない\n𝖒𝖊𝖒𝖊𝖓𝖙𝖔 𝖒𝖔𝖗𝖎\n13ᴋᴀɴ 12ʏᴀx	Ottawa, Ontario																														entity	8.25048e+17	Food	Food	244	255	ksenapathy	519596463
jsonDE3.csv		🌹Rose🌹	I am an Independent. I believe in equal rights, justice,liberty,God,Bible & science. I love nature & music. Almost everything reminds me of a song!																																			443	454	garyruskin	16897082
jsonDE3.csv		🐲 𝕯𝖆𝖓𝖎𝖊𝖑-𝕾𝖆𝖓🙏🏼	Health•Wealth•Wellness•Happiness•Fitness•Food•GMO•Politics•LegitScience•Consciousness•Animals•Kids•Sports•Music•Beer•Wine•funny/random/fun stuff•RTs ≠ endorsemt	San Diego/Los Angeles																																		455	464	pcronald	14849816
jsonDE3.csv		🦺BernieBro🌱Kavn🦺 📣🚗📣🚗#GeneralStrike🇺🇸🐦	Just me. #Shadowbanned so L👁️👁️K for me;\nIf you❤️my tweets, PLEASE RT🔂 \nhttps://t.co/fa5gJyttkn \nkavn@mastodon.online\nkavn@Diaspora.org\nhttps://t.co/EoskmIUCkI	Here, Now \n🦺																																		550	560	yesmaam74	1167576132
jsonDE4.csv	2015-01-19 23:54:39	Éric Darier	Food justice / food sovereignty / agroecology / degrowth. TW & RT don’t mean endorsement. Foodie. Cyclist. Walker. Arts lover. 🎗	Tiohtiá:ke (Montréal)	en	en	1945003796	@HarrietLambFT @FAIRTRADE Dear Harriet, how about revising the current (confusing) labelling system? We're referring to the infamous 20%!	replied_to	271060511	How to construct (fabricate?) public as 'science stupid' to deligitimize the majority call 4 #GMO labelling http://t.co/CEilf8aEfI @GMWatch		DE	Deutschland	Feature	13.0883	52.3381	13.7609	52.6753	city	3078869807f9dd36	Berlin	Berlin, Deutschland	108	130	http://t.co/CEilf8aEfI	http://tumblr.benlillie.com/post/108569325062/do-80-of-americans-not-know-theres-dna-in-food	tumblr.benlillie.com/post/108569325…										131	139	GMWatch	66401056	93	97	GMO		Point	13.3498042	52.4996611	Twitter for Android
jsonDE4.csv	2014-10-22 17:10:16	GMWatch	Countering the propaganda of the biotech industry. Subscribe to free email newsletters: https://t.co/4GoxRVvA0L			en				589133848	@LeysFairtrade @FAIRTRADE Thanks. Good food for thought.....Should we shift from labelling (products) to enabling (producers)?	replied_to	DE	Deutschland	Feature	7.02247	50.6325	7.2107	50.7744	city	e99b714fe65be4fb	Bonn	Bonn, Deutschland															0	14	LeysFairtrade	1945003796				1945003796				Twitter Web Client
jsonDE4.csv																																						15	25	FAIRTRADE	172726892
jsonDE4.csv
jsonDE4.csv
jsonDE4.csv
jsonDE4.csv
jsonDE4.csv
jsonDE4.csv		Fairtrade Intl	#Fairtrade International & its member organizations work to secure better trade terms for #farmers & #workers.	Bonn, Germany
jsonDE4.csv		Harriet Lamb	CEO, Ashden	London, England
jsonDE4.csv		The Leys Fairtrade	The Leys Fairtrade. Partner to @LeysWorldAIMS @LeysEcoschools @LeysHumanRights @LeysCambridge Promoting Fairtrade in and out of school.	Cambridge, UK
jsonDE5.csv	2013-04-30 16:50:52	Svjettle	May contain traces of coconuts.	Sydney		en				278854243	Not one for labelling my food but it continues to go missing in this house.		DE	Deutschland	Feature					admin	1f9ce5a403d4a9bb	Berlin	Berlin, Deutschland																										Tweetbot for iOS
jsonDE5.csv
jsonDE5.csv
jsonDE5.csv
jsonDE6.csv	2012-01-22 10:39:02	meyer.tweets	Prof.Dr. Alfred H. Meyer | lawyer | law on food and food contact materials, crisis management | interested in science, arts, literature, sounds, gardener	München		en				377340037	what about Reg. 1169/2011 - food information? FoodDrinkEurope updated guidance on "Allergen Labelling", "Legibility" and "Origin Labelling"		DE	Deutschland	Feature	11.3606	48.0616	11.7229	48.2481	city	b694c6c2f0f05db2	München	München, Deutschland																										Twitter Web Client
jsonDE6.csv	2012-10-24 15:59:18	CorpoInsider♛	Int' Biz Developer; Liaison Psychiatrist; Commercial Spaces Architect; Branding-Franchising pundit; Smart-setter,Cosmopolitan; Sport-cars lover! #EuroBeliever	Düsseldorf-Monte Carlo- C/gena		en				271776179	#CelioFinancialDesk All supermarkets to adopt 'traffic-light labelling' for nutrition http://t.co/8j0I4CdZ		DE	Deutschland	Feature	6.68873	51.1244	6.93989	51.3525	city	b7d3c12268abd20e	Düsseldorf	Düsseldorf, Deutschland	86	106	http://t.co/8j0I4CdZ	http://dlvr.it/2MyFHT	dlvr.it/2MyFHT														0	19	CelioFinancialDesk		Point	6.75598307	51.22727528	dlvr.it
jsonDK1.csv	2019-05-16 09:52:54	Becca Munro	Sustainable fashion enthusiast, mama of two, day job involves looking after Media Relations for London College of Fashion UAL. Views very much my own.		en	en	8.45206e+17	#5: There's nothing quite like freshly baked bread🍞! Average intake of whole grains in #Denmark is now 63 g/day, up from 36 g/day ten years ago. Will you fill this holiday season with whole grains? 👉https://t.co/XLor7SFPgO #AdventCalendar #Nordicsolutions @MFVMin @WHO_Europe https://t.co/0ogER0Ss1S	replied_to	4806057563	Danish finance minister announces that Denmark bringing in labelling for all products from food to fashion to help consumers understand their environmental/social impact ‘Get moving or get out of the way!’ #CPHFS19 @CphFashSummit @sustfash		DK	Danmark	Feature	12.4531	55.6137	12.6522	55.7318	city	936b83f20956cd4c	København	København, Danmark						39	45	0.954	Place	Denmark					215	229	CPHFashSummit	1.16409e+18	206	214	CPHFS19					Twitter for iPhone
jsonDK1.csv	2018-12-05 07:35:30					en				1281465614	The #Wholegrain logo in #Denmark helps to remind customers that they are purchasing a product with a certain % of whole grain. The logo is found on 800 products.\n\n#nordicsolutions #fuldkorn #nutrition #health #labelling #goodchoice #healthychoiceeasychoice https://t.co/KVRfWp35dZ	quoted												257	280	https://t.co/KVRfWp35dZ	https://twitter.com/nordicfoodpol/status/1070197964319133696	twitter.com/nordicfoodpol/…						domain	65	Interests and Hobbies Vertical	Top level interests and hobbies groupings, like Food or Travel					4	15	Wholegrain					Twitter for iPhone
jsonDK1.csv	2018-06-24 07:19:14					en				134084828	New UK measures hope to cut #obesity by: \n\n🔻🚫sale of 🍫🍪 at shop checkouts, entrances and promo deals \n\n🔻New 🚫on 📺📱ads of unhealthy food (possible &lt;9pm ban) \n\n🔻Calorie labelling when eating out 🍟🥡\n\n🔻🚫 energy drink sales to children 🥤⚡️\n\n➡️ https://t.co/8W3pktujxm https://t.co/BTndIvTE4R													242	265	https://t.co/8W3pktujxm	http://www.bbc.co.uk/news/health-44574477	bbc.co.uk/news/health-44…	4	5	0.5615	Place	UK	domain	65	Interests and Hobbies Vertical	Top level interests and hobbies groupings, like Food or Travel					28	36	obesity					Twitter for iPhone
jsonDK1.csv	2018-12-20 14:28:16	Centre for Sustainable Fashion	We provoke, challenge and question the fashion status quo. We are CSF, a @UAL research centre based at @LCFLondon.	London		en				8.45206e+17	#NordicSolutions do travel🌎 Great meetings at #tastingindia &amp; now we’re looking fwd to work with @fssaiindia on:\n-Public-private partnerships for #sustainablefood\n-Role of authorities in #foodculture change\n-Labelling schemes to promote #healthy food\nMore:https://t.co/2e9MzP3SXR https://t.co/xUBneQb2px													260	283	https://t.co/2e9MzP3SXR	http://www.norden.org/en/solutionsmenu	norden.org/en/solutionsme…										101	112	fssaiindia	7.42942e+17	0	16	NordicSolutions					Twitter for iPhone
jsonDK1.csv																								284	307	https://t.co/xUBneQb2px	https://twitter.com/nordicfoodpol/status/1075744697325404162/photo/1	pic.twitter.com/xUBneQb2px														46	59	tastingindia
jsonDK1.csv																																		entity	9.03304e+17	Wellness and health	Wellness & Health					24	32	Denmark
jsonDK1.csv																																		entity	9.17859e+17	Healthy Eating	Healthy Eating					180	189	fuldkorn
jsonDK1.csv																																		domain	65	Interests and Hobbies Vertical	Top level interests and hobbies groupings, like Food or Travel					190	200	nutrition
jsonDK1.csv																																		entity	8.25048e+17	Food	Food					201	208	health
jsonDK1.csv																																		domain	65	Interests and Hobbies Vertical	Top level interests and hobbies groupings, like Food or Travel					209	219	labelling
jsonDK1.csv																																		entity	8.3916e+17	Travel	Travel					220	231	goodchoice
jsonDK1.csv																																		domain	30	Entities [Entity Service]	Entity Service top level domain, every item that is in Entity Service should be in this domain					232	256	healthychoiceeasychoice
jsonDK1.csv																																		entity	8.24777e+17	Generic Food	Generic Food
jsonDK1.csv																																		domain	66	Interests and Hobbies Category	A grouping of interests and hobbies entities, like Novelty Food or Destinations
jsonDK1.csv																																		entity	8.57603e+17	Destinations	Destinations
jsonDK1.csv																																		domain	30	Entities [Entity Service]	Entity Service top level domain, every item that is in Entity Service should be in this domain
jsonDK1.csv																																		entity	8.25054e+17	Bread	Brand
jsonDK1.csv																								266	289	https://t.co/BTndIvTE4R	https://twitter.com/jackefisher/status/1010754198684790784/photo/1	pic.twitter.com/BTndIvTE4R						entity	8.25048e+17	Food	Food
jsonDK1.csv																																		domain	67	Interests and Hobbies	Interests, opinions, and behaviors of individuals, groups, or cultures; like Speciality Cooking or Theme Parks
jsonDK1.csv																																		entity	1.00628e+18	Food experience	Conversation about eating
jsonDK1.csv																																		domain	65	Interests and Hobbies Vertical	Top level interests and hobbies groupings, like Food or Travel
jsonDK1.csv																																		entity	8.34828e+17	Drinks	Drinks
jsonDK1.csv																																		domain	66	Interests and Hobbies Category	A grouping of interests and hobbies entities, like Novelty Food or Destinations
jsonDK1.csv																																		entity	8.34828e+17	Generic Drinks	Generic Drinks
jsonDK1.csv																																		domain	67	Interests and Hobbies	Interests, opinions, and behaviors of individuals, groups, or cultures; like Speciality Cooking or Theme Parks
jsonDK1.csv																																		entity	8.50449e+17	Energy Drinks	Energy Drinks
jsonDK1.csv		Afton Halloran, PhD	Consultant in Sustainable #FoodSystems / Systems Thinker / Researcher / Host of @The_Nordics Nordic Talks Podcast / Head of Nominations @FoodPlanetPrize	Copenhagen																																						241	249	healthy
jsonDK1.csv		Copenhagen Fashion Summit	The leading event on sustainability in fashion. Organised by @GFAgenda	Copenhagen, Denmark									DK	Danmark	Feature	9.94908	55.9958	10.3892	56.3303	city	55a020e74abc073f	Aarhus	Aarhus, Danmark															230	239	sustfash	42639594
jsonDK1.csv		FSSAI	This is the official account of Food Safety & Standards Authority of India (FSSAI) - the apex food regulator of India under Ministry of Health & Family Welfare.	New Delhi, India																				284	307	https://t.co/xUBneQb2px	https://twitter.com/nordicfoodpol/status/1075744697325404162/photo/1	pic.twitter.com/xUBneQb2px														191	203	foodculture
jsonDK1.csv		Jack Fisher	Technical Officer @WHO. Connecting the dots in #NCDs and #GlobalHealth. Previously @NCDFREE @LancetCountdown @uni_copenhagen.	Geneva, Switzerland																														domain	67	Interests and Hobbies	Interests, opinions, and behaviors of individuals, groups, or cultures; like Speciality Cooking or Theme Parks					163	179	nordicsolutions
jsonDK1.csv		NordicFoodPolicyLab	Nordic Food Policy Lab is a flagship project under the ”Nordic Solutions to Global Challenges” initiative by the Nordic prime ministers. #nordicsolutions																					284	307	https://t.co/xUBneQb2px	https://twitter.com/nordicfoodpol/status/1075744697325404162/photo/1	pic.twitter.com/xUBneQb2px														150	166	sustainablefood
jsonDK2.csv	2015-05-10 15:22:03					en				2391379874	Pls sign/RT:\nStart labelling palm oil on our food products\nhttps://t.co/nhvv2JnZ6r													59	82	https://t.co/nhvv2JnZ6r	https://www.causes.com/campaigns/73037-start-labelling-palm-oil-on-our-food-products?conversion_request_id=283275452&recruiter_id=68507122&utm_campaign=share&utm_content=campaign&utm_medium=wall&utm_source=fb&fb_ref=Default	causes.com/campaigns/7303…																					Twitter Web Client
jsonDK2.csv	2015-08-26 16:25:02					en				2391379874	Pls sign/RT:\nImprove the lives of farm animals with compulsory welfare labelling\nhttps://t.co/q3tYioqcQC http://t.co/cNuJ7JCine													81	104	https://t.co/q3tYioqcQC	https://www.change.org/p/rt-hon-elizabeth-truss-mp-secretary-of-state-department-for-environment-food-and-rural-affairs-george-eustice-mp-rebecca-evans-am-richard-lochhead-msp-michelle-o-neill-improve-the-lives-of-farm-animals-with-compulsory-welfare-labelling?recruiter=51031322&utm_source=share_petition&utm_medium=twitter&utm_campaign=share_twitter_responsive&rp_sharecordion_checklist=control	change.org/p/rt-hon-eliza…																					Twitter Web Client
jsonDK2.csv	2016-04-13 17:06:16	Evi Meuris	#animal lover, especially dogs #animal rights fan #hate animal cruelty and puppy mills! #end BSL - I RT petitions to help animals, please sign or RT	België		en				947491236	Nutrition labelling promotes #foodinnovation #healthyfood says #klausgrunert #MAPPcenter @AarhusUni		DK	Danmark	Feature	9.94908	55.9958	10.3892	56.3303	city	55a020e74abc073f	Aarhus	Aarhus, Danmark															89	99	AarhusUni	224283051	29	44	foodinnovation					Twitter for iPhone
jsonDK2.csv	2016-04-28 23:19:58	Freja Petersen	Animal LOVER. Anti fur, anti hunting/whaling, anti animal testing, anti cruelty. NO life is too small saving\r\nI'm an animal right activist, a rebel with a cause			en				2391379874	@EviMeuris Sussan Ley MP, : Change food labelling to show product containing Palm oil - Sign the Petition! https://t.co/IPy3sddhEN		DK	Danmark	Feature	12.4531	55.6137	12.6522	55.7318	city	936b83f20956cd4c	København	København, Danmark	107	130	https://t.co/IPy3sddhEN	https://www.change.org/p/sussan-ley-mp-change-food-labelling-to-show-product-containing-palm-oil?recruiter=51031322&utm_source=share_petition&utm_medium=twitter&utm_campaign=share_twitter_responsive	change.org/p/sussan-ley-m…	11	20	0.5923	Person	Sussan Ley					0	10	EviMeuris	842775895				842775895				Twitter Web Client
jsonDK2.csv	2015-05-10 15:22:06					en				2391379874	@EviMeuris Pls sign/RT:\nStart labelling palm oil on our food products\nhttps://t.co/nhvv2JnZ6r													70	93	https://t.co/nhvv2JnZ6r	https://www.causes.com/campaigns/73037-start-labelling-palm-oil-on-our-food-products?conversion_request_id=283275452&recruiter_id=68507122&utm_campaign=share&utm_content=campaign&utm_medium=wall&utm_source=fb&fb_ref=Default	causes.com/campaigns/7303…										0	10	EviMeuris	842775895				842775895				Twitter Web Client
jsonDK2.csv	2015-08-26 16:25:08	Lone Ryg Olsen	EVP, Aarhus University, twittering about entrepreneurship	DK		en				2391379874	@EviMeuris Pls sign/RT:\nImprove the lives of farm animals with compulsory welfare labelling\nhttps://t.co/q3tYioqcQC http://t.co/Bu5IZrjIY4													92	115	https://t.co/q3tYioqcQC	https://www.change.org/p/rt-hon-elizabeth-truss-mp-secretary-of-state-department-for-environment-food-and-rural-affairs-george-eustice-mp-rebecca-evans-am-richard-lochhead-msp-michelle-o-neill-improve-the-lives-of-farm-animals-with-compulsory-welfare-labelling?recruiter=51031322&utm_source=share_petition&utm_medium=twitter&utm_campaign=share_twitter_responsive&rp_sharecordion_checklist=control	change.org/p/rt-hon-eliza…										0	10	EviMeuris	842775895				842775895				Twitter Web Client
jsonDK2.csv																																										45	57	healthyfood
jsonDK2.csv																																										63	76	klausgrunert
jsonDK2.csv																																										77	88	MAPPcenter
jsonDK2.csv																								105	127	http://t.co/cNuJ7JCine	https://twitter.com/Freja_Petersen/status/636544887245144064/photo/1	pic.twitter.com/cNuJ7JCine
jsonDK2.csv		Aarhus Universitet	Officiel Twitter-konto for #AarhusUni. Vi tweeter på dansk om forskning, uddannelse og samarbejde. Tweets in English @AarhusUni_int. Student?: @StudyAarhusUni.	Aarhus, Denmark																				116	138	http://t.co/Bu5IZrjIY4	https://twitter.com/Freja_Petersen/status/636544912876531713/photo/1	pic.twitter.com/Bu5IZrjIY4
jsonES1.csv	2021-06-18 19:30:16	Álεx εl Protεctor x) 🔻🏳️‍🌈	26 ❤️💛💜• LG(B)IT 🏳️‍🌈• Él/He/Him • 'The only limit is the only one you set yourself' • Bifrutas Caótico • #Gorkálεx 19 💚💙 @epsilonlock	Madrid	es	es	8.01798e+17			253968932	🧀Con @anapastorjulian en @DonApolonio. Los @populares mostramos nuestro apoyo al #quesomanchego y la excelencia de productos de nuestra tierra.\n\n❌Rechazamos la injusta valoración de #Nutriscore. Exigimos el reajuste del algoritmo y que el Gobierno proteja la dieta mediterránea. https://t.co/UEYf1UZZqh													279	302	https://t.co/UEYf1UZZqh	https://twitter.com/rosaromerocr/status/1405940942918623232/photo/1	pic.twitter.com/UEYf1UZZqh						domain	10	Person	Named people in the world like Nelson Mandela	5	21	anapastorjulian	307570052	81	95	quesomanchego					Twitter for iPhone
jsonES1.csv	2021-03-26 18:01:03					es				180766082	🔵 Los diputados @GPPopular JA Bermúdez de Castro y @MoroMjesus están en Guijuelo, junto al alcalde y la DO Guijuelo defendiendo la industria chacinera. Piden al gobierno que aplace la implantación del sistema Nutriscore, con consecuencias nefastas para productos como el jamón. https://t.co/HVMThAAgQA													278	301	https://t.co/HVMThAAgQA	https://twitter.com/PPdeSalamanca/status/1375493010654433281/photo/1	pic.twitter.com/HVMThAAgQA	31	48	0.3915	Person	Bermúdez de Castro					16	26	GPPopular	121803322								Twitter for iPhone
jsonES1.csv	2021-07-28 12:57:34					es				8.60462e+17	🔴 #Nutriscore perjudica el patrimonio cultural y gastronómico europeo en beneficio de productos alimentarios, diseñados artificialmente, que buscan una mejor catalogación en este🚦nutricional simplista y poco fiable al no considerar todos los nutrientes de los alimentos. https://t.co/BxjZiIfqZd	quoted												271	294	https://t.co/BxjZiIfqZd	https://twitter.com/NoNutriscore/status/1420307690077687809	twitter.com/NoNutriscore/s…						domain	65	Interests and Hobbies Vertical	Top level interests and hobbies groupings, like Food or Travel					2	13	Nutriscore					Twitter for iPhone
jsonES1.csv	2021-04-12 22:20:04					es				273084024	📎Interesante debate entre científicos sobre #Nutriscore y sus bases científicas \n\n👉https://t.co/EWetZ8xoMg\n\n@JordiSalasSalva @PilarGalan10 @HercbergS @RafaEscudero1 @agarzon @consumogob @mapagob @LuisPlanas @BesMaira @cgomezdonoso @DrTinahones @sociedadSEEN													83	106	https://t.co/EWetZ8xoMg	https://www.twitch.tv/videos/984932775?tt_medium=mobile_web_share&tt_content=vod	twitch.tv/videos/9849327…						domain	10	Person	Named people in the world like Nelson Mandela	108	124	JordiSalasSalva	963121062	44	55	Nutriscore					Twitter for iPhone
jsonES1.csv	2021-05-15 18:20:27	NutriSEEN	Área de Nutrición de la Sociedad Española de Endocrinología y Nutrición (SEEN)			es				273084024	📌excelente entrevista @FernandoMoner 👏👏👏 Enhorabuena!\n\n https://t.co/f3KUB9XHO2													56	79	https://t.co/f3KUB9XHO2	https://www.revistaalimentaria.es/vernoticia.php?noticia=fernando-moner-nutriscore-debe-ser-la-base-para-fijar-el-sistema-mas-cercano-a-perfecto	revistaalimentaria.es/vernoticia.php…										22	36	FernandoMoner	8.93077e+17								Twitter for iPhone
jsonES1.csv	2021-06-16 18:00:11	Cooperativas Agro-alimentarias de España	Representamos a más de 3.700 #cooperativas y a más de 1 millón de socias y socios del sector #agroalimentario español	Madrid		es				253968932	🏛@agarzon comparece hoy en Comisión #Sanidad y #Consumo del @Congreso_Es para explicar por qué el Gobierno apoya el semáforo de alimentos #NutriScore que tanta controversia suscita entre científicos, productores y países 🇪🇺 y que perjudica notablemente a los productos españoles. https://t.co/FeGn95AvM2													280	303	https://t.co/FeGn95AvM2	https://twitter.com/rosaromerocr/status/1405193497486008325/photo/1	pic.twitter.com/FeGn95AvM2	99	106	0.5644	Organization	Gobierno	domain	10	Person	Named people in the world like Nelson Mandela	1	9	agarzon	11904592	36	44	Sanidad					Twitter for iPhone
jsonES1.csv	2021-04-01 17:20:08					es				538574076	🇮🇹Italia también se opone al #NutriScore\n\nhttps://t.co/oyTiMeocji													42	65	https://t.co/oyTiMeocji	https://www.olimerca.com/noticiadet/italia-tambien-se-opone-al-nutriscore/8f707b2fcd1624ae8d78029e1450f799	olimerca.com/noticiadet/ita…	4	9	0.8472	Place	Italia									29	40	NutriScore					Twitter for Android
jsonES1.csv	2021-03-25 17:21:48					es				265981634	Y si ponen el cartón de la caja les sale Nutriscore A 💪 https://t.co/A8k1NKF6ho	quoted												56	79	https://t.co/A8k1NKF6ho	https://twitter.com/SinAzucarOrg/status/1375118027331620866	twitter.com/SinAzucarOrg/s…																					Twitter for Android
jsonES1.csv	2021-07-14 13:34:22					ca				1040141557	Visitem #Aromis a #Montblanc revisem amb el Joan Cartanyà @Aromiscat la situació del cultiu del safrà i derivats a la #Conca i així com les posibles afectacions per els nous sistemes d’etiquetatge com #Nutriscore entre d’altres.\n#Seguim\n#TerritoriCampdeTarragona\n#AlCostatDeLaGent https://t.co/XBsoaDMQGO													281	304	https://t.co/XBsoaDMQGO	https://twitter.com/JosepRufa/status/1415273461207945228/photo/1	pic.twitter.com/XBsoaDMQGO										58	68	Aromiscat	557868986	8	15	Aromis					Twitter for iPad
jsonES1.csv	2021-05-27 21:28:51	Joaquin Ruiz	Pues si. Especie Humana. Género M. Omnívoro.Heterosexual.Calvo. Veterinario. Del PSOE. Del Real Madrid	Marina de Cudeyo, España		es				3050478862	Visita de nuestro #eurodiputado y portavoz de pesca del @ppeuropa_ @gabrielmatoadrover para hablar de\n👉Nuevo Fondo Europeo Marítimo\n👉Brexit \n👉Plan de gestión del Mediterráneo\n👉PAC\n👉Lobo\n👉Cuotas\n👉Nutriscore\nGabriel:muchas gracias y repetiremos!\nSeguimos 🅿️🅿️💪💪🇪🇺🇪🇺🇪🇸🇪🇸🇵🇱🇵🇱 https://t.co/R6OZ6BpDXR													272	295	https://t.co/R6OZ6BpDXR	https://twitter.com/amayalandin/status/1397998250259628033/photo/1	pic.twitter.com/R6OZ6BpDXR						domain	30	Entities [Entity Service]	Entity Service top level domain, every item that is in Entity Service should be in this domain					18	31	eurodiputado					Twitter for iPhone
jsonES1.csv	2021-11-23 14:37:39	Dra. Luisa Solano Pérez	#Nutritionist . MSc. #PhD #nutrition #dietetics #dysfagia #gastronomy and #EVOO #AOVE #luisasolanonut		es	es	230175706			2149479180	Verdad verdadera. Lo importante es una dieta equilibrada y variada, y como mejor exponente la #DietaMediterránea a la que casualmente maltrata #Nutriscore. ¿Por que @consumogob/@agarzon se empeñan en ir contra uno de nuestros baluartes y se alinea con grandes #multinacionales?🤔 https://t.co/3TvamJ8CZH	quoted	ES	España	Feature	-3.51984	40.2481	-3.36974	40.3522	city	fdfe71d3b7d78b56	Arganda del Rey	Arganda del Rey, España	279	302	https://t.co/3TvamJ8CZH	https://twitter.com/NoNutriscore/status/1463138307064356870	twitter.com/NoNutriscore/s…						domain	10	Person	Named people in the world like Nelson Mandela	165	176	consumogob	1.22426e+18	94	112	DietaMediterránea					Twitter for iPhone
jsonES1.csv	2021-09-12 13:34:08				es	es	8.01798e+17			1.14237e+18	Vaya! El Nutriscore siempre lleno de sorpresas https://t.co/9wO7GVMZwb	quoted	ES	España	Feature	-4.16046	40.5189	-4.03249	40.6374	city	4b35cbc1d7271abb	El Escorial	El Escorial, España	47	70	https://t.co/9wO7GVMZwb	https://twitter.com/SinAzucarOrg/status/1436732092658954249	twitter.com/SinAzucarOrg/s…																					Twitter for Android
jsonES1.csv	2021-11-22 20:56:25				es	es	210903328		replied_to	2456225724	Una A en el NutriScore https://t.co/F92hNDqtha	quoted	ES	España	Feature	1.7221	41.2187	1.835	41.2947	city	28788db978032fdf	Sant Pere de Ribes	Sant Pere de Ribes, España	23	46	https://t.co/F92hNDqtha	https://twitter.com/SuperFalete/status/1462768703725056016	twitter.com/SuperFalete/st…																					Twitter for Android
jsonES1.csv	2021-09-23 00:00:35	Togada Desde La Raya penitente en transición ☄️☄️	Lectora compulsiva y optimista.Disfruta de la vida y los sentidos. SentidoComunista. LibrePensadora Melancólica a tiempo parcial. A veces leo códigos legales.	Suroeste. Abajo a la izquierda		es				273084024	Un estudio sobre Nutriscore sugiere que no perjudicaría la imagen del aceite de oliva en España https://t.co/sY5kEG7OLj		ES	España	Feature	-7.2038	39.2402	-6.87097	39.4365	city	a4b5c9d50adfb1e8	San Vicente de Alcántara	San Vicente de Alcántara, España	96	119	https://t.co/sY5kEG7OLj	https://www.agrodiario.com/texto-diario/mostrar/3168184/estudio-sobre-nutriscore-sugiere-no-perjudicaria-imagen-aceite-oliva-espana	agrodiario.com/texto-diario/m…	17	26	0.4132	Person	Nutriscore																Twitter for iPhone
jsonES1.csv	2021-07-01 21:25:00					es				1.1207e+18	Todos los productos alimentarios aprobados por sanidad se pueden distribuir en cualquier lugar. Que para eso están aprobados. Y el nutriscore a tomar por culo.	replied_to																																	1.1207e+18				Twitter for Android
jsonES1.csv	2021-06-17 22:59:46					es				249340300	Siempre digo que es bueno leer antes de hablar. Hay mucha sin razón. El PP llama "vendido" a Garzón por implantar Nutriscore… hasta que descubren que ellos mismos lo exigieron https://t.co/HdzB9FPvHQ vía @eldiarioes													176	199	https://t.co/HdzB9FPvHQ	https://www.eldiario.es/132_7aca40	eldiario.es/132_7aca40	72	73	0.9648	Organization	PP	domain	47	Brand	Brands and Companies	204	215	eldiarioes	535707261								Twitter for iPhone
jsonES1.csv	2021-05-10 17:25:07					es				1.14237e+18	Si se aprueba Nutri-Score como \nperfil nutricional, se va a enterrar durante los \npróximos años la posibilidad real de mejorar la salud \nalimentaria de la población. https://t.co/zlXM1N1jAu													166	189	https://t.co/zlXM1N1jAu	https://juanrevenga.com/2021/04/si-creias-que-lo-de-rociito-era-lo-mas-en-culebrones-espera-a-ver-el-de-nutriscore/	juanrevenga.com/2021/04/si-cre…																					Twitter for Android
jsonES1.csv	2021-04-15 06:42:38	Francisco Tinahones	Endocrinologo, investigador. Comprometido sanidad y educación pública. #obesidad Presidente SEEDO Soc Esp Obesidad. Director Científico IBIMA. A ratos poeta	Málaga		es				1.2469e+18	RECTIFICACIÓN YA ,ES MUY MALA IMAGEN PARA ESPAÑA MINISTRO Garzón insiste en que no se va a aplazar la implantación de 'NutriScore' pese a la solicitud de algunas comunidades https://t.co/SDyMoIMNKG vía @infosalus_com													174	197	https://t.co/SDyMoIMNKG	https://www.infosalus.com/actualidad/noticia-garzon-insiste-no-va-aplazar-implantacion-nutriscore-pese-solicitud-algunas-comunidades-20210414110254.html	infosalus.com/actualidad/not…	42	47	0.4963	Place	ESPAÑA					202	216	infosalus_com	253031005								Twitter for Android
jsonES1.csv	2021-07-03 17:18:23				es	es	1.2505e+18		replied_to	66646655	Que bueno sería tener un Nutriscore que te dijera que un producto es una mierda aunque sea el mejor en comparación con el mismo de otras marcas.\n\nSpoiler, no es lo que pasa.\n\n#Nutrimierda. https://t.co/uNIROWRvMw	quoted												189	212	https://t.co/uNIROWRvMw	https://twitter.com/PilarGalan10/status/1411023236851277829	twitter.com/PilarGalan10/s…														175	187	Nutrimierda					Twitter for Android
jsonES1.csv	2021-07-08 15:05:20					es				481381127	Nutriscore es una mierda y se debería de cambiar, pero las recomendaciones de bajar el consumo de carne roja se llevan realizando años por los expertos sanitarios. https://t.co/5FNFdmizZX	quoted												164	187	https://t.co/5FNFdmizZX	https://twitter.com/agarzon/status/1413054451422740480	twitter.com/agarzon/status…																					Twitter for Android
jsonES1.csv	2021-06-16 20:58:24	constance1982 (😷)	te llaman porvenir porque no vienes nunca...			es				239287624	Nutriscore es una basura\nDa igual cuando leas esto																																						Twitter for Android
jsonES1.csv	2021-09-17 08:23:38	Nekane 😷	Politika, komunikazioa, kultura eta futbola. “Se puede amar lo que se es sin odiar lo que no se es". Iritzi pertsonalak - Opiniones personales.	Lutxana-Barakaldo	es	es	308670873		quoted	1.22916e+18	NutriScore es insuficiente: trucos de empresas para 'engañar' al sistema https://t.co/4szkqeWA0p		ES	España	Feature	-4.17439	39.1276	-3.77855	39.3299	city	726fe495ac918763	Malagón	Malagón, España	73	96	https://t.co/4szkqeWA0p	https://hipertextual.com/2021/09/trucos-nutriscore	hipertextual.com/2021/09/trucos…																					Twitter for iPhone
jsonES1.csv	2021-09-15 12:50:44	EL PAÍS	La mejor información en español. Con nuestra mirada puesta en España, Europa y América. Suscríbete a los hechos: https://t.co/KDqDo00kRF\nAyuda: \n@elpais_mas	Madrid	es	pt	8.01798e+17			1.33919e+18	nutriscore como referencia 😵‍💫 https://t.co/KEY4jIhH98	quoted	ES	España	Feature	-3.83674	37.9772	-3.68248	38.0606	city	10b191365fa7ccea	Jabalquinto	Jabalquinto, España	31	54	https://t.co/KEY4jIhH98	https://twitter.com/SinAzucarOrg/status/1413045293050961927	twitter.com/SinAzucarOrg/s…																					Twitter for Android
jsonES1.csv	2021-08-12 17:23:55	Nancy Babio	Lic. en Nutrición por la Universidad de Buenos Aires y Doctora por la Universitat Rovira i Virgili. Realizo mi hobby diariamente y me pagan por ello!	Reus	es	es	8.26158e+17		replied_to	1.11782e+18	no claro es más sano el nesquik que el queso manchego según el Nutriscore, venga xddd https://t.co/xJoJI2Nxqv	quoted												86	109	https://t.co/xJoJI2Nxqv	https://twitter.com/SinAzucarOrg/status/1425702672171249669	twitter.com/SinAzucarOrg/s…						domain	45	Brand Vertical	Top level entities that describe a Brands industry												Twitter for Android
jsonES1.csv	2021-06-18 01:52:30	Ana Pastor Julián	Vicepresidenta segunda del Congreso de los Diputados en la XIV Legislatura. Vicesecretaria de Política Social del Partido Popular	Madrid		es				17322849	Mira que he criticado yo a Alberto Garzón, pero acabo de ver los zascas a la diputada Riolobos por lo del Nutriscore y el repaso es la De Dios…																		27	40	0.9963	Person	Alberto Garzón	domain	10	Person	Named people in the world like Nelson Mandela												Twitter for iPhone
jsonES1.csv	2021-04-22 14:36:52	Hercberg Serge	Professeur de Nutrition, Faculté Médecine Université Sorbonne Paris Nord (ex Paris 13)\nEquipe de Recherche en Epidémiologie Nutritionnelle Inserm/Inra/Cnam/UP13	Paris, France		es				15747096	Mejor que #nutriscore y más sincero, el etiquetado de @Lacasitos #asiSi . ¿Qué opinas @SinAzucarOrg ? https://t.co/c4zErAc1OI													102	125	https://t.co/c4zErAc1OI	https://twitter.com/andresaco/status/1385210996814401541/photo/1	pic.twitter.com/c4zErAc1OI										54	64	Lacasitos	552606802	10	21	nutriscore					Twitter for Android
jsonES1.csv	2021-03-28 06:13:10					es				463640534	Me comentan que el matarratas tiene una B en el nutriscore. Todo un éxito. https://t.co/qVQe94aUm3	quoted												75	98	https://t.co/qVQe94aUm3	https://twitter.com/SinAzucarOrg/status/1375917876062871555	twitter.com/SinAzucarOrg/s…						domain	45	Brand Vertical	Top level entities that describe a Brands industry												Twitter for iPhone
jsonES1.csv	2021-10-29 15:02:19	JOSÉ MARÍA CASTILLA	Good professional,better person @Univ_Villanueva @mcpc_unav @GSPMgwu #PDAP #Corporate & #PoliticalComm #Lobby #Agribusiness #Tauromaquia La verdad te hará libre	Brussels-Madrid-Córdoba		es				538574076	Luis Planas tumba el proyecto de Alberto Garzón de implantar #NutriScore a partir de 2022\n\nhttps://t.co/54WUm0ElGk		ES	España	Feature	1.91529	41.2645	2.04675	41.3232	city	8a25b05167dc5120	Gavà	Gavà, España	91	114	https://t.co/54WUm0ElGk	https://www.elespanol.com/espana/politica/20211029/luis-planas-proyecto-alberto-garzon-implantar-nutriscore/622938127_0.html	elespanol.com/espana/politic…	0	10	0.945	Person	Luis Planas	domain	10	Person	Named people in the world like Nelson Mandela					61	72	NutriScore					Twitter for Android
jsonES1.csv	2021-06-29 12:17:03					es				538574076	Los niños necesitan alimentarse con #alimentos no con productos como estos.\nSe ha desvirtuado tanto este sistema de etiquetado #Nutriscore. https://t.co/OhPgwC1uLD	quoted												140	163	https://t.co/OhPgwC1uLD	https://twitter.com/StephanPetersNL/status/1409782938842062850	twitter.com/StephanPetersN…						domain	45	Brand Vertical	Top level entities that describe a Brands industry					36	46	alimentos					Twitter for Android
jsonES1.csv	2021-06-20 12:29:25	Gaticornio Hyliano🥐	24. ♂, ♑,INTP. MUSE/BTS/OTAKU/ZURDO/Estudiante de Pastelería🥐/TLoZ/Entrenador Pokémon tipo Agua 水/Gatete de un Pandita❤/Gleek/Mago de Fairy Tail	Hyrule~Magnolia~Barcelona	en	es	276712971		quoted	510585273	Lo del nutriscore da vergüenza ajena. https://t.co/mSR0x4VnfG	quoted												38	61	https://t.co/mSR0x4VnfG	https://twitter.com/AntonioRosell_/status/1406365153688535044	twitter.com/AntonioRosell_…																					Twitter for Android
jsonES1.csv	2021-06-17 23:05:44				es	es	273084024		replied_to	361355340	Las cosas que pasan cuando se prefiere sacrificar la razón y solo se busca generar crispación . Ridículo del PP “en directo” en el asunto del #NutriScore https://t.co/6goJFW53fi	quoted												154	177	https://t.co/6goJFW53fi	https://twitter.com/eldiarioes/status/1405481347045601280	twitter.com/eldiarioes/sta…	109	110	0.9419	Organization	PP									142	153	NutriScore					Twitter for iPhone
jsonES1.csv	2021-07-08 20:29:00					es				53108535	La mentira del #Nutriscore Y el ministro @agarzon viviendo en su mundo paralelo. https://t.co/2CdQFucqC2	quoted												81	104	https://t.co/2CdQFucqC2	https://twitter.com/SinAzucarOrg/status/1413045293050961927	twitter.com/SinAzucarOrg/s…						domain	10	Person	Named people in the world like Nelson Mandela	41	49	agarzon	11904592	15	26	Nutriscore					Twitter for Android
jsonES1.csv	2021-06-17 23:04:58	David Macho	Manager: Spanish Inq; Host #DialogosdeComic; Guest Coordinator at @dutchcomiccon, @ComicConNordics, @Heroes_ComicCon and others; writer, editor, intl. rights...	ÜT: 41.498967,2.186957		es				579414663	La ignorancia es atrevida \n\nEl PP llama "vendido" a Garzón por implantar Nutriscore… hasta que descubren que ellos mismos lo exigieron https://t.co/5xU3KbrlTU vía @eldiarioes													135	158	https://t.co/5xU3KbrlTU	https://www.eldiario.es/132_7aca40	eldiario.es/132_7aca40	31	32	0.9581	Organization	PP	domain	47	Brand	Brands and Companies	163	174	eldiarioes	535707261								Twitter for Android
jsonES1.csv	2021-11-24 21:07:09	Hector *se vende espacio para nombre ingenioso*	Le digo cosas bonitas a gente maja y bloqueo a quien me lleve la contraria	Vigo, Galiza		und				72614507	https://t.co/DYoGPVmSPv		ES	España	Feature	-3.889	40.3121	-3.51801	40.6435	city	206c436ce43a43a3	Madrid	Madrid, España	0	23	https://t.co/DYoGPVmSPv	https://www.ilsole24ore.com/art/nutriscore-francia-patatine-diventano-piu-sane-dell-olio-extra-vergine-AEugk7w	ilsole24ore.com/art/nutriscore…																					Twitter for Android
jsonES1.csv	2021-04-04 21:17:27					und				1.2909e+18	https://t.co/5L4VLbk8A6													0	23	https://t.co/5L4VLbk8A6	https://www.lavozdegalicia.es/noticia/sociedad/2021/04/04/nutriscore-sistema-divide-expertos-refrescos-cacao-azucar-oliva/00031617538176835473543.htm	lavozdegalicia.es/noticia/socied…																					Twitter for Android
jsonES1.csv	2021-04-13 18:05:11	Grupo Popular Congreso 🇪🇸	Grupo Parlamentario Popular en el Congreso de los Diputados.	Madrid		es				23606887	Hoy en @debocaaorella hablo sobre #Nutriscore y la industria que lo parió \n@radio4_rne https://t.co/CfKhhtIQKW													87	110	https://t.co/CfKhhtIQKW	https://twitter.com/nachoballesta/status/1382001933393784837/photo/1	pic.twitter.com/CfKhhtIQKW										7	21	debocaaorella	205879778	34	45	Nutriscore					Twitter for iPhone
jsonES1.csv	2021-06-17 17:13:54	elDiario.es	Periodismo a pesar de todo. Hazte socio, hazte socia https://t.co/MhnaDP0OnT			es				257091696	Hoy el PP de #Castelldefels presenta una moción contra la aplicación del sistema #Nutriscore que ellos mismos reclamaban implantar de manera urgente en mayo de 2020.\n\nEl sistema nutriscore ayuda a salvar vidas reduciendo la obesidad y la dieta mediterránea también. 🙌🔝🥗🥕🍊🥘 https://t.co/DtZFrfYG78	quoted												273	296	https://t.co/DtZFrfYG78	https://twitter.com/agarzon/status/1405208995506307078	twitter.com/agarzon/status…	7	8	0.8085	Organization	PP									13	27	Castelldefels					Twitter for Android
jsonES1.csv	2021-09-22 08:48:37	Rafa Morata 👈🏼	Maestro de la pública. Sociata al punto. Cinéfilo. Popero. El churro como voluntad y representación. Mantequillita. Autor de la web española sobre Fassbinder	Ceuta		es				1.07827e+18	Hilo muy útil para entender los sesgos en los estudios que promueven el #Nutriscore https://t.co/6QERtvfV6D	quoted	ES	España	Feature	-6.10685	37.3897	-6.03007	37.4565	city	c3b32910922ac71b	Valencina de la Concepción	Valencina de la Concepción, España	84	107	https://t.co/6QERtvfV6D	https://twitter.com/Malnutridos/status/1440253824384393219	twitter.com/Malnutridos/st…														72	83	Nutriscore					Twitter for Android
jsonES1.csv	2021-05-13 20:46:47	Nacho Ballesta	Inconformista por naturaleza. Gaditano en BCN. Director en @thefoodtellers @t_storytellers. Ambassador de @patagoniaeurope Pro Community Colaborador @radio4_Rne	Barcelona, España.		es				29756787	Hay muchas cosas que achacar a #Nutriscore. Una de ellas es que, al ser voluntario, su uso se pervierte. Si mi producto tiene buena puntuación lo introduzco, y si no, no lo hago. Tengo pruebas de ello😅 https://t.co/j568SWnR74	quoted												202	225	https://t.co/j568SWnR74	https://twitter.com/SinAzucarOrg/status/1392801871480377345	twitter.com/SinAzucarOrg/s…														31	42	Nutriscore					Twitter for Android
jsonES1.csv	2021-10-17 22:11:10	The Súper Supermen	3 blostes me voy tragando como un gilipollas...		es	es	8.01798e+17		replied_to	2525191568	Habría q darle una buena repensada a utilizar #NutriScore, tenemos otros modelos mucho más interesantes xa defender a los consumidores https://t.co/yEbPRi7Kk4	quoted	ES	España	Feature	1.06507	41.3054	1.24039	41.4271	city	5fca2b580c6f379e	Montblanc	Montblanc, España	135	158	https://t.co/yEbPRi7Kk4	https://twitter.com/Conscientecole_/status/1449102500771029003	twitter.com/Conscientecole…														46	57	NutriScore					Twitter for Android
jsonES1.csv	2021-04-10 18:59:34					es				538574076	Francisco Pérez Jiménez: "#Nutriscore es demasiado permisivo con algunos alimentos y muy exigente con otros" @fperezjimenez 👌\n\nhttps://t.co/Zwr3THypt6													127	150	https://t.co/Zwr3THypt6	https://www.revistaalimentaria.es/vernoticia.php?volver=&noticia=francisco-perez-jimenez-nutriscore-es-demasiado-permisivo-con-algunos-alimentos-y-muy-exigente-con-otros	revistaalimentaria.es/vernoticia.php…	0	22	0.9657	Person	Francisco Pérez Jiménez					109	123	fperezjimenez	317337151	26	37	Nutriscore					Twitter for Android
jsonES1.csv	2021-08-02 01:59:15	G2 m1xwell	Pro VALORANT player for @G2esports ⚈ https://t.co/z7NOHC1gV8 ⚈ https://t.co/sOSgDFunrB ⚈ https://t.co/elcX8csCRC ⚈ https://t.co/Z4jvl1z7bz	Girona, Spain		en				106059651	Four sparkling wines to celebrate the return of indoor dining https://t.co/1gzQgBsg2I \n\n“Pepe Raventós, the 21st generation of his family to work the vineyards, went one step further in 2012 and began labelling his wines … Conca del Riu Anoia” Textures de Pedra 🍾													62	85	https://t.co/1gzQgBsg2I	https://www.irishtimes.com/life-and-style/food-and-drink/four-sparkling-wines-to-celebrate-the-return-of-indoor-dining-1.4625944	irishtimes.com/life-and-style…						domain	65	Interests and Hobbies Vertical	Top level interests and hobbies groupings, like Food or Travel												Twitter for iPhone
jsonES1.csv	2021-06-17 18:03:08	Víctor Arrogante ✊🌹🔻	Ayer y hoy militante por la justicia, la igualdad y la solidaridad. Inmediatamente me di cuenta que era algo por lo que merecía la pena luchar. #porlaRepública	Madrid (España)		es				1.14499e+18	Esto pperos al regalarle los Master, no saben por dinde pisan\nEl PP llama "vendido" a Garzón por implantar Nutriscore… hasta que descubren que ellos mismos lo exigieron https://t.co/nNBBsPyG0b													169	192	https://t.co/nNBBsPyG0b	https://www.eldiario.es/132_7aca40	eldiario.es/132_7aca40	65	66	0.9583	Organization	PP																Twitter for Android
jsonES1.csv	2021-04-14 22:21:34					es				112562229	Entonces...\n¿#Nutriscore es bueno.?\n¿ #Bitcoin es malo?\n#lol																							domain	45	Brand Vertical	Top level entities that describe a Brands industry					13	24	Nutriscore					Twitter for Android
jsonES1.csv	2021-11-23 15:42:56	Romana DL	Italiana en Barcelona, donde curro cocino como y corro. Viajo cada vez que puedo. Me gusta aprender algo cada día. Respeto este planeta y cuido de él. 🐈🐈	Catalunya		es				538574076	En Bélgica hay supermercados que premian a los clientes con descuentos si llevan productos con clasificación A, B #Nutriscore 🙆‍♀️🤦 https://t.co/MAP4zuAAwk		ES	España	Feature	-3.79491	42.2848	-3.58397	42.404	city	aab98cb60835e83e	Burgos	Burgos, España	133	156	https://t.co/MAP4zuAAwk	https://twitter.com/SolanoLuisa/status/1463156115903029257/photo/1	pic.twitter.com/MAP4zuAAwk	3	9	0.9865	Place	Bélgica									115	126	Nutriscore					Twitter for Android
jsonES1.csv	2021-04-20 11:27:54	Maira Bes-Rastrollo	Profesora Medicina Preventiva y Salud Pública, Universidad de Navarra	Pamplona, Spain		es				1435264950	En algo más de 30 minutos estaré en directo en @radiosurco hablando sobre el NutriScore.\n\nUn tema, del cuál muchos me habéis preguntado en Ciudad Real https://t.co/AGBQJPp6ul													152	175	https://t.co/AGBQJPp6ul	https://www.instagram.com/p/CN4frOUlOGv/?igshid=146utyk58j98r	instagram.com/p/CN4frOUlOGv/…	140	150	0.8104	Place	Ciudad Real					47	58	RadioSurco	248047045					Point	-3.93333	38.9833	Instagram
jsonES1.csv	2021-05-27 07:42:10	J. Andrés Pizarro	Dios no usa un PC. Yo no hago milagros	España		es				239287624	El timo del #NutriScore \nHace días que no hablaba de esta fulaña con 0 credibilidad https://t.co/Roaip2lIh0	quoted												84	107	https://t.co/Roaip2lIh0	https://twitter.com/juan_revenga/status/1397570032662626307	twitter.com/juan_revenga/s…						domain	65	Interests and Hobbies Vertical	Top level interests and hobbies groupings, like Food or Travel					12	23	NutriScore					Twitter for Android
jsonES1.csv	2021-06-17 23:21:05	Nicolas	A veces hago cosas.	Madrid, España	es	es	3909597713		quoted	76593802	El PP llama "vendido" a Garzón por implantar Nutriscore… hasta que descubren que ellos mismos lo exigieron https://t.co/qVDkranL1h													107	130	https://t.co/qVDkranL1h	https://www.eldiario.es/rastreador/pp-llama-vendido-garzon-implantar-nutriscore-descubren-exigieron_132_8047168.html	eldiario.es/rastreador/pp-…	3	4	0.9816	Organization	PP																Twitter for Android
jsonES1.csv	2021-07-09 17:56:41				es	es	1.2113e+18			215231570	El mismo que impone el Nutriscore os dice que no comáis carne, la conclusión se saca sola																																						Twitter for Android
jsonES1.csv	2021-04-12 22:20:09	𝙅𝙖𝙫𝙞𝙚𝙧 🔻 #Vacunado	Asturiano por el mundo. No estoy aquí para decirte lo que quieres oir. Simplemente te diré lo que pienso. Por cierto, que lo de la clase media es mentira.	País Valencià		es				273084024	El #Nutriscore ha demostrado científicamente cada uno de los pasos. Hasta que no haya otro etiquetado que demuestre científicamente ser superior, la mejor opción es #Nutriscore	replied_to																														3	14	Nutriscore	273084024				Twitter for iPhone
jsonES1.csv	2021-06-20 21:17:22	Eibel 🍃	97' de León y el resto es improvisación.🌿\n/L/\n\nBiólogo. ULe.\n\nFuturo profesor 🐾🦋🌺	León, España		es				227749743	Dudas sobre el #Nutriscore https://t.co/FKajwZhLQG	quoted												27	50	https://t.co/FKajwZhLQG	https://twitter.com/AntonioRosell_/status/1406365153688535044	twitter.com/AntonioRosell_…														15	26	Nutriscore					Twitter for iPhone
jsonES1.csv	2021-10-29 07:43:02					es				248267147	Da igual lo sano o no que coman: el PP y sus derechuzas gremlins siempre serán la letra E en el Nutriscore de cualquier cosa.		ES	España	Feature	-15.5412	27.842	-15.381	27.951	city	3eebc89148fa533b	Agüimes	Agüimes, España						36	37	0.9016	Organization	PP																Twitter for Android
jsonES1.csv	2021-10-28 12:35:44					es				1.06018e+18	Cómo sea igual que la de las casas de apuestas…estamos apañadxs. \n\nPodría empezar por rehacer el “nutriscore” que actualmente no tiene ni pies ni cabeza o por realizar un etiquetado negro cómo ya hacen otros países advirtiendo de las consecuencias del consumo de estos productos. https://t.co/S4eE2QlqSx	quoted	ES	España	Feature	-4.64055	36.6118	-4.5163	36.7162	city	3f5102bbac88f700	Alhaurín de la Torre	Alhaurín de la Torre, España	280	303	https://t.co/S4eE2QlqSx	https://twitter.com/el_pais/status/1453653217519325187	twitter.com/el_pais/status…						domain	66	Interests and Hobbies Category	A grouping of interests and hobbies entities, like Novelty Food or Destinations												Twitter for iPhone
jsonES1.csv	2021-09-22 13:36:22	Nacho Duque	Intento de buen padre x2 • Periodista (en Marca), la mejor profesión • Especializado en baloncesto, el mejor deporte • Lo que digo aquí lo digo yo, no mi medio.	Innisfree		es				538574076	Comienza la mesa redonda sobre #Nutriscore en #Expoliva2021 https://t.co/tk24RptxGX		ES	España	Feature	-3.88905	43.4345	-3.76325	43.4948	city	590e9f3315ea23a7	Santander	Santander, España	60	83	https://t.co/tk24RptxGX	https://twitter.com/SolanoLuisa/status/1440641116798291987/photo/1	pic.twitter.com/tk24RptxGX														31	42	Nutriscore					Twitter for Android
jsonES1.csv	2021-10-25 22:09:24	Ministerio de Consumo	Perfil oficial del Ministerio de Consumo 📱 Gobierno de España 💼 Alberto Garzón - @agarzon	Paseo del Prado, 18 (Madrid)	es	es	265935718			538574076	Agricultura planta cara a Consumo por #Nutriscore\n@mapagob\n\nhttps://t.co/1EZveFkurl		ES	España	Feature	-3.86827	38.0311	-3.70625	38.1538	city	b0f8a83b0ac5b6a5	Bailén	Bailén, España	60	83	https://t.co/1EZveFkurl	https://www.ondacero.es/noticias/sociedad/agricultura-planta-cara-consumo-nutriscore_202110256176c853888b6900011b2a6c.html	ondacero.es/noticias/socie…										50	58	mapagob	280425258	38	49	Nutriscore					Twitter for Android
jsonES1.csv	2021-06-14 20:51:18					es				66646655	Acabo de ver Nutriscore en el super en un producto de Nestlé calificado como A y me ha dado pánico.																		13	22	0.3366	Person	Nutriscore	domain	45	Brand Vertical	Top level entities that describe a Brands industry												Twitter for Android
jsonES1.csv	2021-06-16 23:22:12					es				433458652	A ver, reconozco que lo de la luz me toca los cojones como consumidor, el nutriscore tampoco me gusta, pero aquí le doy la razón. Ahora, que vergüenza ya me dais todos, eh? Ni uno se libra ya. https://t.co/IiFOEwpu0B													193	216	https://t.co/IiFOEwpu0B	https://twitter.com/quiquepeinado/status/1405203069957292039	twitter.com/quiquepeinado/…																					Twitter for Android
jsonES1.csv	2021-07-08 16:44:08	Antonio Pizarroso	Don’t Trust. Verify.	Seville, Spain		es				101550298	4 fotos que se entienden mejor juntas y explican la BASURA que es Nutriscore, que solo sirve para blanquear la venta de ultraprocesados. https://t.co/DQjdw4Q1qb													137	160	https://t.co/DQjdw4Q1qb	https://twitter.com/Elcabofurriel/status/1413146890674208773/photo/1	pic.twitter.com/DQjdw4Q1qb	66	75	0.391	Person	Nutriscore																Twitter for Android
jsonES1.csv	2021-07-09 09:35:40	Jose Mª Santos #NOalDespilfarroAlimentario	#Solidaridad por principio. \nY hasta el final. \n#DespilfarroAlimentario\n#Hambre\n#Paro\n#Imigración\n#Cooperativismo\n#EconomíaSocial	Valladolid, España		es				573162625	@svqcity En salud pública antes que la carne está el problema de los ultraprocesados, donde su defensa del Nutriscore hace un flaco favor, y seguramente también el alcohol. Pero hasta donde sé ni siquiera ha podido eliminar la publicidad de juegos de azar de la televisión...	replied_to																	107	116	0.3937	Person	Nutriscore	domain	66	Interests and Hobbies Category	A grouping of interests and hobbies entities, like Novelty Food or Destinations	0	8	svqcity	212623380				212623380				Twitter for Android
jsonES1.csv	2021-06-22 13:26:11					es				847562318	@SinAzucarOrg Me voy a comer 3 kilos de jamón. Que es comida real y está genial. Esto es, de nuevo, una simplificación, al igual que el propio nutriscore	replied_to																										0	13	SinAzucarOrg	8.01798e+17				8.01798e+17				Twitter for Android
jsonES1.csv	2021-08-11 23:10:59					es				497374065	@SinAzucarOrg Me quedo con el jamón Serrano, apunte le ponga la letra “Z” del #nutriscore	replied_to																	36	42	0.8399	Person	Serrano					0	13	SinAzucarOrg	8.01798e+17	78	89	nutriscore	8.01798e+17				Twitter for iPhone
jsonES1.csv	2021-04-19 22:10:21	Clara Gómez Donoso	Recent PhD graduate particularly interested in upstream determinants of health and policy implementation for chronic disease prevention.	Spain		es				1.00643e+18	@SinAzucarOrg Lo del nutriscore no hay por donde cogerlo	replied_to																										0	13	SinAzucarOrg	8.01798e+17				8.01798e+17				Twitter for iPhone
jsonES1.csv	2021-06-16 22:10:47	Néstor Durán	Entre trayectos se tropieza uno con las mejores casualidades. (Muchas gracias amiga)	Zaragoza, España		pt				1.29279e+18	@SinAzucarOrg @agarzon O éstas\n#Nutriscore https://t.co/oLqMoTEVa0	replied_to												43	66	https://t.co/oLqMoTEVa0	https://twitter.com/Villaca59686203/status/1405256563745558532/photo/1	pic.twitter.com/oLqMoTEVa0						domain	10	Person	Named people in the world like Nelson Mandela	0	13	SinAzucarOrg	8.01798e+17	31	42	Nutriscore	8.01798e+17				Twitter for Android
jsonES1.csv	2021-05-08 10:12:15					es				8.05467e+17	@RuizSisniega @agarzon @LuisPlanas @laSextaTV Teniendo en cuenta que defienden el nutriscore...	replied_to																						domain	10	Person	Named people in the world like Nelson Mandela	0	13	RuizSisniega	410949894				410949894				Twitter for Android
jsonES1.csv	2021-10-30 11:10:03					es				520767149	@recomtogadaraya Venga. Sin comparar. El chorizonutricionalmente hablando es de los peores alimentos. De hecho nl hay peor. Si tienes el nutriscore del chorizo natural siente libre de compartirlo. A ver si sale una "A" 😉 https://t.co/yH6PRMrofs	replied_to	ES	España	Feature	1.05758	41.1022	1.19115	41.1898	city	31d6ba09e3108530	Reus	Reus, España	221	244	https://t.co/yH6PRMrofs	https://twitter.com/ganso75/status/1454375032084471810/photo/1	pic.twitter.com/yH6PRMrofs										0	16	recomtogadaraya	3172324479				3172324479				Twitter for Android
jsonES1.csv	2021-10-30 11:05:14					es				520767149	@recomtogadaraya Justamente esa es la principal queja frente al nutriscore. Los procesados obtienen mejor puntuacion porque en el proceso le quitan parte de las grasas naturales para hacerlos "light" o "ligeros" o tener mejor puntuacion. ¿Procesan el chorizo para añadirle grasa??????	replied_to	ES	España	Feature	-3.87402	37.6287	-3.61106	37.9541	city	eaa9968c2be92860	Jaén	Jaén, España															0	16	recomtogadaraya	3172324479				520767149				Twitter for Android
jsonES1.csv	2021-06-16 18:54:36	Agustin Herrero	Trabajo en Cooperativas Agro-alimentarias	Madrid		es				7.13418e+17	@quiquepeinado Pues que el Nutriscore es una mierda diseñada para beneficio de empresas de alimentación, no del consumidor. Eso es lo importante, no las guerras políticas ( todos lo han apoyado antes o después)	replied_to																	28	37	0.338	Organization	Nutriscore					0	14	quiquepeinado	189906799				189906799				Twitter for Android
jsonES1.csv	2021-07-08 17:52:38	Laura Villadiego	Freelance journalist based in Madrid. Formerly in SEA (2009-2019). Writing about labour issues, human rights and the environment. Fascinated with supply chains	Madrid		es				573162625	@ptarra La verdad es que en otros temas como el Nutriscore o la publicidad de juegos de azar tampoco se está luciendo mucho...	replied_to																	48	57	0.3177	Person	Nutriscore	domain	66	Interests and Hobbies Category	A grouping of interests and hobbies entities, like Novelty Food or Destinations	0	7	ptarra	358245186				358245186				Twitter for Android
jsonES1.csv	2021-09-10 12:23:59	Ministerio de Agricultura, Pesca y Alimentación	Perfil oficial del Ministerio de Agricultura, Pesca y Alimentación del Gobierno de España. 🇪🇺🇪🇸 #UnaPACparaTODOS #AlimentáisNuestraVida	España	es	es	392190512			14764527	@perijoves Me llamaba la atención el contraste del "no gluten" con el nutriscore. Vamos, el marketing de estas compañías. Nutricionalmente, pues si estás todo el día picando de ellos no sería lo más saludable, como cualquier alimento de este tipo.	replied_to	ES	España	Feature	0.153375	40.2034	0.32228	40.3934	city	a27bfeffbee94b80	Alcalà de Xivert	Alcalà de Xivert, España											domain	66	Interests and Hobbies Category	A grouping of interests and hobbies entities, like Novelty Food or Destinations	0	10	perijoves	264300174				264300174				Twitter for Android
jsonES1.csv	2021-05-09 13:15:22					es				2198165738	@NutriRebel Debe ser por el moho 😂\n\nQué barbaridad el nutriscore. Sólo porque su algoritmo concluye que tiene mucha grasa saturada (supongo)	replied_to																										0	11	NutriRebel	9.89175e+17				9.89175e+17				Twitter for Android
jsonES1.csv	2021-08-04 15:12:51					es				1187972214	@Mixwell Nutriscore B, después que si hay obesidad en España putos gordos diabéticos	replied_to																	54	59	0.9914	Place	España	domain	10	Person	Named people in the world like Nelson Mandela	0	8	Mixwell	941648953				941648953				Twitter for Android
jsonES1.csv	2021-06-17 13:26:22	Manuel Pérez 😷 ó 🚑 🇪🇺🇪🇸	Manchego (nací en #Tomelloso ). Racionalista. Anduve por el mundo y ya estoy de vuelta. ¡Ah!, por supuesto, no soy objetivo. Faltaría más. #mientras_observo	De acá para allá		es				66646655	@Lluarquesa @rauru_org @vicdeprado @SinAzucarOrg @Dalek_fan A ver explicado está el problema es que no aporta nada y viendo que la población de este magnífico país en líneas generales no se caracteriza por tener un alto grado de conocimiento sobre cualquier cosa... Nutriscore en la práctica va a ser una herramienta para blanquear mierda.	replied_to																										0	11	Lluarquesa	190221709				190221709				Twitter for Android
jsonES1.csv	2021-08-23 15:29:02					es				53108535	@JuanmiRP91 A ver si me entero. Yo que soy absolutamente profano en el tema de la nutrición, quiero comprar de forma saludable y voy a por mi paquetito de cacao en polvo. Me fío del etiquetado NutriScore y compro cacao con azúcar porque es más sano que sin azúcar.\n¿Correcto?	replied_to																										0	11	JuanmiRP91	308670873				308670873				Twitter for Android
jsonES1.csv	2021-08-23 18:47:59					es				53108535	@JuanmiRP91 @SinAzucarOrg Vuelvo a hacer la pregunta de otra forma a ver si así me responde directamente. NutriScore indica que un producto con 25% cacao y 75% azúcar es más sano que un producto que es 100% cacao, ¿eso es real?	replied_to	ES	España	Feature	-5.82098	43.4417	-5.56291	43.5779	city	731c9d11275a5436	Gijón	Gijón, España															0	11	JuanmiRP91	308670873				308670873				Twitter for Android
jsonES1.csv	2021-08-23 19:13:36	Miguel Ángel Barberá	Delegado de ventas. Narrador del Carrusel Deportivo local en Radio Elche y Elche TV.			es				53108535	@JuanmiRP91 @SinAzucarOrg El consumidor de a pie va a ir a comprar los productos marcados con una A en el NutriScore pensando que así realiza una compra mas sana y eso no es verdad. No mira que sea o no de un mismo tipo. Si ve una "hamburguesa vegana" ultraprocesada" marcada con una A y ve después un	replied_to	ES	España	Feature	1.93746	41.2635	2.00243	41.296	city	f187cccea5a90392	Castelldefels	Castelldefels, España											domain	65	Interests and Hobbies Vertical	Top level interests and hobbies groupings, like Food or Travel	0	11	JuanmiRP91	308670873				53108535				Twitter for Android
jsonES1.csv	2021-10-12 08:07:41	Super Falete 🇳🇵	Es muy duro tener superpoderes y seguir una dieta.\nCreador de contenido.	Show me the money!	es	es	264300174		replied_to	891423564	@juan_revenga @WHO Ya se ha demostrado lo ineficaz y influenciada por las grandes industrias y lobbies que es nutriscore.	replied_to	ES	España	Feature	-6.0488	37.3488	-6.02024	37.3795	city	260f5fd28d44a040	San Juan de Aznalfarache	San Juan de Aznalfarache, España															0	13	juan_revenga	239914756				239914756				Twitter for iPhone
jsonES1.csv	2021-07-10 06:21:46					es				29221053	@jomasarod @lauravilladiego @FernandoVallada Que comemos demasiada carne está claro. Que el ministro de consumo se ha ganado a pulso no tener autoridad en la materia, también. Baila al son de otros int€r€$€$. https://t.co/eMvu6t5qjq	replied_to												209	232	https://t.co/eMvu6t5qjq	http://www.publico.es/sociedad/alimentacion-saludable-consumo-preve-sistema-nutriscore-reduzca-3-mortalidad-asociada-obesidad.html	publico.es/sociedad/alime…										0	10	jomasarod	8.26158e+17				8.26158e+17				Twitter for Android
jsonES1.csv	2021-08-05 23:24:32					es				2653059364	@JGlezluis @sergiofdezp75 @snickers_es Partiendo de la base de que snickers tiene nutriscore Z	replied_to																						domain	45	Brand Vertical	Top level entities that describe a Brands industry	0	10	JGlezluis	392190512				392190512				Twitter for iPhone
jsonES1.csv	2021-08-23 16:37:52	World Health Organization (WHO)	We are the #UnitedNations’ health agency - #HealthForAll.\n▶️ Always check our latest tweets on #COVID19 for updated advice/information.	Geneva, Switzerland		es				53108535	@Jesus_2nd_vers @JuanmiRP91 Pero NutriScore me dice que es más sano 🤨 A mí y a cualquiera que se fíe de ese etiquetado 🤷‍♂️	replied_to	ES	España	Feature	-0.782491	38.1278	-0.510153	38.3446	city	3178a2f5b3c63ea4	Elche	Elche, España						33	42	0.6317	Person	NutriScore					0	15	Jesus_2nd_vers	223563856				223563856				Twitter for Android
jsonES1.csv	2021-06-18 18:44:55	Bea Redfield	A veces twitteo cosas con sentido.\n\n𝘈𝘳𝘴 𝘎𝘳𝘢𝘵𝘪𝘢 𝘈𝘳𝘵𝘪𝘴	Lost		es				3214663845	@GanchitoC Pero si el nutriscore es como el radarcovid cambiado de nombre, es para la cepa de progres excepcionalmente tontos.	replied_to																										0	10	GanchitoC	1.32145e+18				1.32145e+18				Twitter for Android
jsonES1.csv	2021-06-22 16:22:17					es				1040317068	@europapress Lo del nutriscore la verdad que hace más fácil hacer una compra saludable. Para cuándo un indicador similar en las declaraciones de los políticos? Con sus parámetros como demagogia, cinismo, populismo...	replied_to																						domain	47	Brand	Brands and Companies	0	12	europapress	121385551				121385551				Twitter for Android
jsonES1.csv	2021-10-29 10:16:29				es	es	239914756			2366038838	@duque_nacho @miguelangelara Y porque no centrarse en banalidades como la subida de la luz, en como mitigar su impacto en la cesta de la compra..., cosas mundanas de la vida. Ademas en vez de prohibir porque no educar en una alimentación sana?? Ademas cada vez q se meten en un nutriscore o similar j... algo	replied_to	ES	España	Feature	-5.6313	42.5472	-5.53377	42.6401	city	a87ad701b9cd8f8a	León	León, España															0	12	duque_nacho	90672218				90672218				Twitter for Android
jsonES1.csv	2021-07-09 07:18:46					es				183297651	@Doble_Malta Cuidado, que viene el nutriscore a agujerear la capa de ozono con su nutritaladro, que todos sabemos que es el problema aquí.	replied_to																										0	12	Doble_Malta	252285035				252285035				Twitter for Android
jsonES1.csv	2021-11-27 14:15:54	Severino Pérez Sant.	Ingeniero Informático - Desarrollador .Net, Front y BackEnd en Aldaba.	A Coruña	en	es	1.3287e+18			66782184	@Charlie_Saias @emosqueira @_hectrol_ es una coña que por tener vitamina C se considere más sano cuando suelen sobrar vitaminas de otras fuentes y la cantidad de azúcar es lo peor del producto. Y además sube 2 rangos de nutriscore, no fuese a ser que 1 fuese demasiado poco. Desinformación	replied_to	ES	España	Feature	-8.47128	43.3014	-8.37434	43.3899	city	d16c1b8ae1635978	A Coruña	A Coruña, España															0	14	Charlie_Saias	1125551736				1125551736				Twitter for Android
jsonES1.csv	2021-06-16 20:09:19	M a e s e	Albéitar. Uno de los Hermanos Dalton. Twitter es como los San Fermines, unos corren delante de los toros y otros los apretamos por detrás. Devoto de Lali.	Donde un 18 de Julio		es				1.29279e+18	@Castro_Mas_Cota Los bocatas de jamón ibérico con chorrito de aceite de oliva virgen son comida basura para Nutriscore.	replied_to																										0	16	Castro_Mas_Cota	7.82552e+17				7.82552e+17				Twitter for Android
jsonES1.csv	2021-06-17 13:16:58					es				478458916	@CarmenRiolobos @agarzon @eldigitalCLM Y lo de nutriscore que ? tienes más cara que espalda.	replied_to																						domain	10	Person	Named people in the world like Nelson Mandela	0	15	CarmenRiolobos	106811959				106811959				Twitter for Android
jsonES1.csv	2021-06-18 08:47:43	Rosa Romero	Politóloga (UCM). Diputada PP. Presidenta Comisión Sanidad y Consumo Congreso. ExVicepresidenta 3ª del Congreso. Orgullo ser 1ª mujer Alcaldesa de Ciudad Real.	Ciudad Real/Madrid	es	es	410949894		quoted	3214663845	@ArturoVilla_ Nutriscore tiene el mismo futuro que radarcovid	replied_to																										0	13	ArturoVilla_	3402184198				3402184198				Twitter for Android
jsonES1.csv	2021-07-12 16:15:55	Joan Cartanyà	Des del 2008 cultivant plantes aromàtiques i promovent la recuperació del cultiu del safrà ecològic a Catalunya.	La Conca de Barberà		es				19399014	@Arregius @Uri85_ @Midietacojea Unos hablando de datos que aporta desde hace años @FAOenEspanol @opsoms y demás organismos y otros hablando de nutriscore… es muy fácil racionalizar el asesinato de miles de animales por un simple sabor y textura determinado cuando no se es la víctima verdad?	replied_to																										0	9	Arregius	419587693				419587693				Twitter for iPhone
jsonES1.csv	2021-05-20 18:55:49	Diego Maciá 😷 #VACUNADO	Me	Elche		en				538574076	@ArisChristod I gree with you, NutriScore damage the healthy image od EVOO by having the same classification as refined ones. They are absolutely different in terms of nutritional quality.	replied_to																										0	13	ArisChristod	276712971				276712971				Twitter for Android
jsonES1.csv	2021-10-20 19:02:51	No-Nutriscore Alliance	The Nutriscore is a truly unfair and discriminatory food labelling system, which misleads consumers, destroying entire European production chains. #NoNutriscore	Brussels, Belgium	es	es	8.01798e+17			374087271	@AntoniValcarcel En el Nutriscore como esta valorado el jamón? Pues eso.	replied_to	ES	España	Feature	-6.52559	38.3729	-6.3952	38.4941	city	6dcdccc89fa8b0d8	Zafra	Zafra, España						23	32	0.3796	Place	Nutriscore					0	16	AntoniValcarcel	210903328				210903328				Twitter for Android
jsonES1.csv	2021-06-21 11:34:30					es				255620705	@al3x_hh Y aunque sepas como va es una mierda el nutriscore… A día de hoy no he logrado ver AOVE en letras verdes… Sólo miran la cantidad de grasas y no la calidad… \nComo dices hay que aprender a leer etiquetado, porque visto está que nos pueden engañar como les da la gana 🥲	replied_to																										0	8	al3x_hh	457633436				457633436				Twitter for iPhone
jsonES1.csv	2021-06-17 12:58:47	Average depression haver	¯\_(ツ)_/¯	Asturias, de momento		es				7.2715e+17	@agarzon Pero no sé podría hacer algo por mejorarlo?. Porque para eso no se necesita la ayuda de la derecha, ya se sabe que el "nutriscore" es un mal sistema, no?. Pues empezad a hacer algo con ello.	replied_to																						domain	10	Person	Named people in the world like Nelson Mandela	0	8	agarzon	11904592				11904592				Twitter for Android
jsonES1.csv	2021-06-16 19:41:11					es				1.29279e+18	@agarzon Pero ésto lo dijo usted, ¿No? Hace 4 meses: Nutriscore (sistema de etiquetado francés para evaluar la calidad alimenticia), califica al aceite de oliva español como "comida basura", y abogaba por sacarlo de ese etiquetado. https://t.co/x2jMFxqA9Q	replied_to												232	255	https://t.co/x2jMFxqA9Q	https://twitter.com/Villaca59686203/status/1405218913970003972/photo/1	pic.twitter.com/x2jMFxqA9Q						domain	10	Person	Named people in the world like Nelson Mandela	0	8	agarzon	11904592				11904592				Twitter for Android
jsonES1.csv	2021-06-16 19:50:42	Juan Carlos Fraga	Socio 2456	Corunna, Galicia		es				1.29279e+18	@agarzon A ver si a lo que se refería Riolobos o Villalobos o como se llame, es a que abogaba por la creación de un sistema de etiquetado similar, PERO ESPAÑOL, NO FRANCÉS, que no rebajase la calidad de los productos españoles, como hace Nutriscore (introducido por USTED y su ministerio).	replied_to																	38	45	0.7964	Person	Riolobos	domain	10	Person	Named people in the world like Nelson Mandela	0	8	agarzon	11904592				1.29279e+18				Twitter for Android
jsonES1.csv	2021-06-16 22:26:39					es				1.29279e+18	@_estoy_de_paso @agarzon ¡Que hace un año ya estaba implementado! Lo que dice esa PNL es que no se perjudique al campo español, porque los productos estrella españoles, como el aceite de oliva virgen o el jamón ibérico, #Nutriscore lo califica como comida basura. Evidentemente hay una intencionalidad. https://t.co/G4uWIxO4EK	replied_to												303	326	https://t.co/G4uWIxO4EK	https://twitter.com/Villaca59686203/status/1405260557037547525/photo/1	pic.twitter.com/G4uWIxO4EK						domain	10	Person	Named people in the world like Nelson Mandela	0	15	_estoy_de_paso	1.2505e+18	220	231	Nutriscore	1.2505e+18				Twitter for Android
jsonES1.csv	2021-07-09 14:41:52					es				84756122	#lascosasclaras164 \n\nMás contaminación da el turismo que la carne.\n\nInclusos los datos de la FAO indican que España no es el país que consume más carne.\n\nPreocúpense de la bollería, ultraprocesados y un nutriscore inútil																		93	95	0.933	Organization	FAO									0	18	lascosasclaras164					Twitter for Android
jsonES1.csv	2021-06-12 10:12:25	Hernán	'Y ahora silencio, mamarracho!'	Palma, España		es				361814138	#Entrevista | @agustin_herrero DG @CoopsAgroES \n"Hay que hacer una enorme campaña de comunicación y formación para que el consumidor interprete #Nutriscore correctamente" \n\n🎥 https://t.co/KyMHVZFSsD https://t.co/93ajWQs5IG													177	200	https://t.co/KyMHVZFSsD	https://www.revistaalimentaria.es/vernoticia.php?volver=&noticia=agustin-herrero-hay-que-hacer-una-enorme-campana-de-comunicacion-y-formacion-para-que-el-consumidor-interprete-nutriscore-correctamente	revistaalimentaria.es/vernoticia.php…										15	31	agustin_herrero	438196076	0	11	Entrevista					Twitter for iPhone
jsonES1.csv	2021-04-13 21:26:25					und				273084024	#Ciencia #Nutriscore https://t.co/5LE9gpnTSP	quoted												21	44	https://t.co/5LE9gpnTSP	https://twitter.com/NutriSeen/status/1382022223721066501	twitter.com/NutriSeen/stat…														0	8	Ciencia					Twitter for iPhone
[truncated: 10,358 more rows]
[truncated: 111 more columns]

## Sheet: CONVERT ALL DATA (2)
Source.Name	data__created_at	includes__users__name	includes__users__location	includes__tweets__author_id	includes__tweets__text	includes__tweets__referenced_tweets__type	data__author_id	data__text	Column 2 translation	Announcement2	Opinion2	EU Regulation2	Science/Knowledge2	data__referenced_tweets__type	includes__places__country_code	includes__places__country	includes__places__geo__type	includes__places__geo__bbox__001	includes__places__geo__bbox__002	includes__places__geo__bbox__003	includes__places__geo__bbox__004	includes__places__place_type	includes__places__id	includes__places__name	includes__places__full_name	data__entities__urls__start	data__entities__urls__end	data__entities__urls__url	data__entities__urls__expanded_url	data__entities__urls__display_url	data__entities__annotations__start	data__entities__annotations__end	data__entities__annotations__probability	data__entities__annotations__type	data__entities__annotations__normalized_text	data__context_annotations__|	data__context_annotations__|__id	data__context_annotations__|__name	data__context_annotations__|__description	data__entities__mentions__start	data__entities__mentions__end	data__entities__mentions__username	data__entities__mentions__id	data__entities__hashtags__start	data__entities__hashtags__end	data__entities__hashtags__tag	data__in_reply_to_user_id	data__geo__coordinates__type	data__geo__coordinates__coordinates__001
[truncated: 11,823 more rows]
[truncated: 113 more columns]
